# Supplementary material for: Synaptic targets of photoreceptors specialized to detect color and skylight polarization in Drosophila
Source: eLife journal article supplement (doi:10.7554/elife.71858), 2021-12-16

Supplementary File 2: Gallery plots of all seed column  
R7, R8, R7-DRA and R8-DRA target cells by type

**Contents**

|                                    |    |
|------------------------------------|----|
| Central seed column Dm9 . . . . .  | 5  |
| Central seed column Dm8 . . . . .  | 6  |
| Central seed column MeTu . . . . . | 9  |
| Central seed column R7 . . . . .   | 12 |
| Central seed column Tm5c . . . . . | 13 |
| Central seed column Tm20 . . . . . | 15 |
| Central seed column Mi15 . . . . . | 17 |
| Central seed column Mi4 . . . . .  | 18 |
| Central seed column ML1 . . . . .  | 19 |
| Central seed column Dm2 . . . . .  | 21 |
| Central seed column Dm11 . . . . . | 22 |
| Central seed column L3 . . . . .   | 23 |
| Central seed column Mi1 . . . . .  | 24 |

|                                                              |    |
|--------------------------------------------------------------|----|
| Central seed column R8 . . . . .                             | 25 |
| Central seed column Tm5a . . . . .                           | 26 |
| Central seed column Tm5b . . . . .                           | 27 |
| Central seed column Tm . . . . .                             | 28 |
| Central seed column Tm5b-like . . . . .                      | 31 |
| Central seed column Mi9 . . . . .                            | 32 |
| Central seed column L1 . . . . .                             | 33 |
| Central seed column aMe12 . . . . .                          | 34 |
| Central seed column Dm . . . . .                             | 35 |
| Central seed column ML-VPN1 . . . . .                        | 36 |
| Central seed column C2 . . . . .                             | 37 |
| Central seed column Mt-VPN . . . . .                         | 38 |
| Central seed column Mti . . . . .                            | 40 |
| Central seed column Tm5a-like . . . . .                      | 41 |
| Central seed column TmY10 . . . . .                          | 41 |
| Central seed column Mi10 . . . . .                           | 42 |
| Central seed column Mi . . . . .                             | 42 |
| Central seed column C3 . . . . .                             | 42 |
| Central seed column Identified $< 3$ synapses . . . . .      | 43 |
| Central seed column Unidentified $\geq 3$ synapses . . . . . | 47 |
| Central seed column Unidentified $< 3$ synapses . . . . .    | 48 |
| DRA seed column Dm-DRA1 . . . . .                            | 58 |



|                                     |    |
|-------------------------------------|----|
| DRA seed column Dm9 . . . . .       | 61 |
| DRA seed column MeTu-DRA . . . . .  | 62 |
| DRA seed column R7-DRA . . . . .    | 72 |
| DRA seed column Dm-DRA2 . . . . .   | 73 |
| DRA seed column Dm2 . . . . .       | 75 |
| DRA seed column R8-DRA . . . . .    | 76 |
| DRA seed column Mi15 . . . . .      | 77 |
| DRA seed column Mti-DRA-1 . . . . . | 78 |
| DRA seed column MeMe-DRA . . . . .  | 80 |
| DRA seed column L3 . . . . .        | 81 |
| DRA seed column VPN-DRA . . . . .   | 82 |
| DRA seed column L1 . . . . .        | 84 |
| DRA seed column Tm20 . . . . .      | 85 |
| DRA seed column Mti-DRA-2 . . . . . | 86 |
| DRA seed column Mi1 . . . . .       | 88 |
| DRA seed column MeTu . . . . .      | 89 |
| DRA seed column Tm5-like . . . . .  | 90 |
| DRA seed column Mi9 . . . . .       | 90 |
| DRA seed column Dm11 . . . . .      | 91 |
| DRA seed column aMe12 . . . . .     | 91 |
| DRA seed column TmY . . . . .       | 92 |
| DRA seed column ML-VPN2 . . . . .   | 92 |

|                                                         |     |
|---------------------------------------------------------|-----|
| DRA seed column C2 . . . . .                            | 93  |
| DRA seed column Identified $< 3$ synapses. . . . .      | 94  |
| DRA seed column Unidentified $\geq 3$ synapses. . . . . | 100 |
| DRA seed column Unidentified $< 3$ synapses. . . . .    | 101 |

# Central seed column Dm9 (6 cells)

skid = 11452427

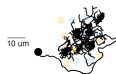

skid = 11452427

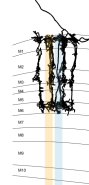

skid = 11447061

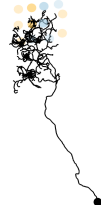

skid = 11447061

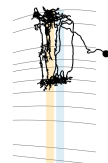

skid = 11450495

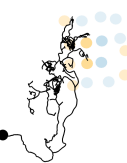

skid = 11450495

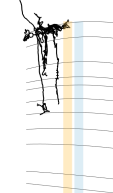

skid = 11484679

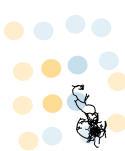

skid = 11484679

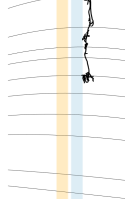

skid = 11444386

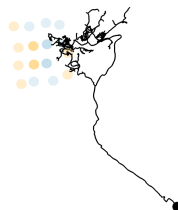

skid = 11444386

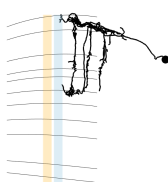

skid = 11454714

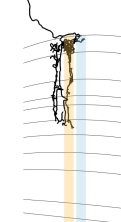

skid = 11454714

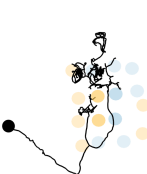

# Central seed column Dm8 (15 cells)

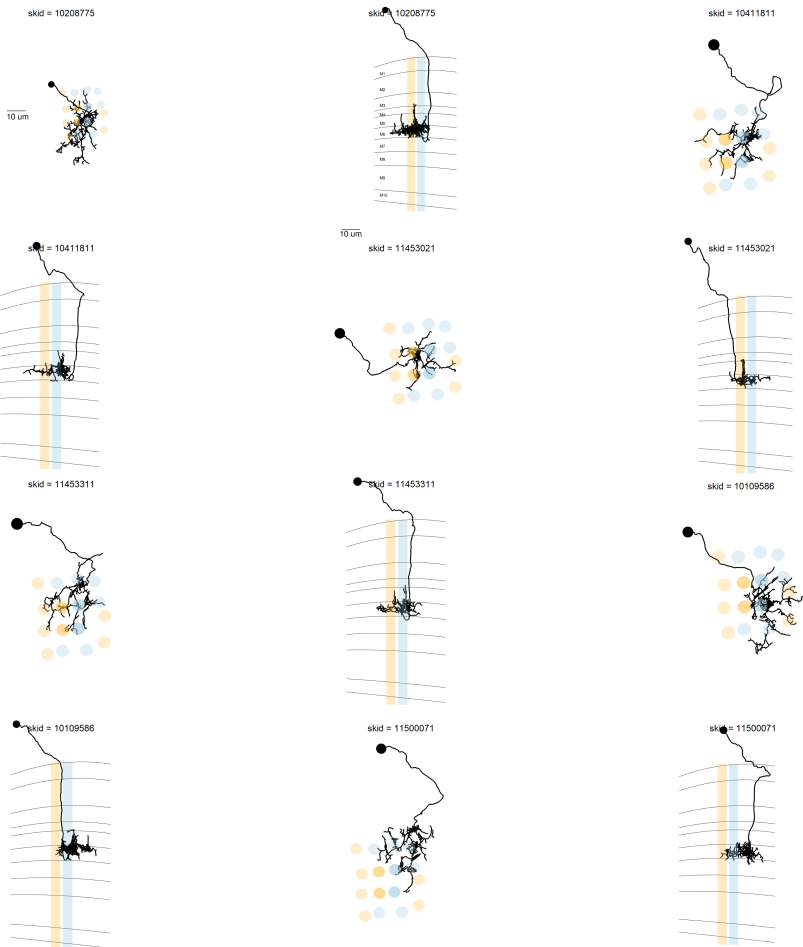

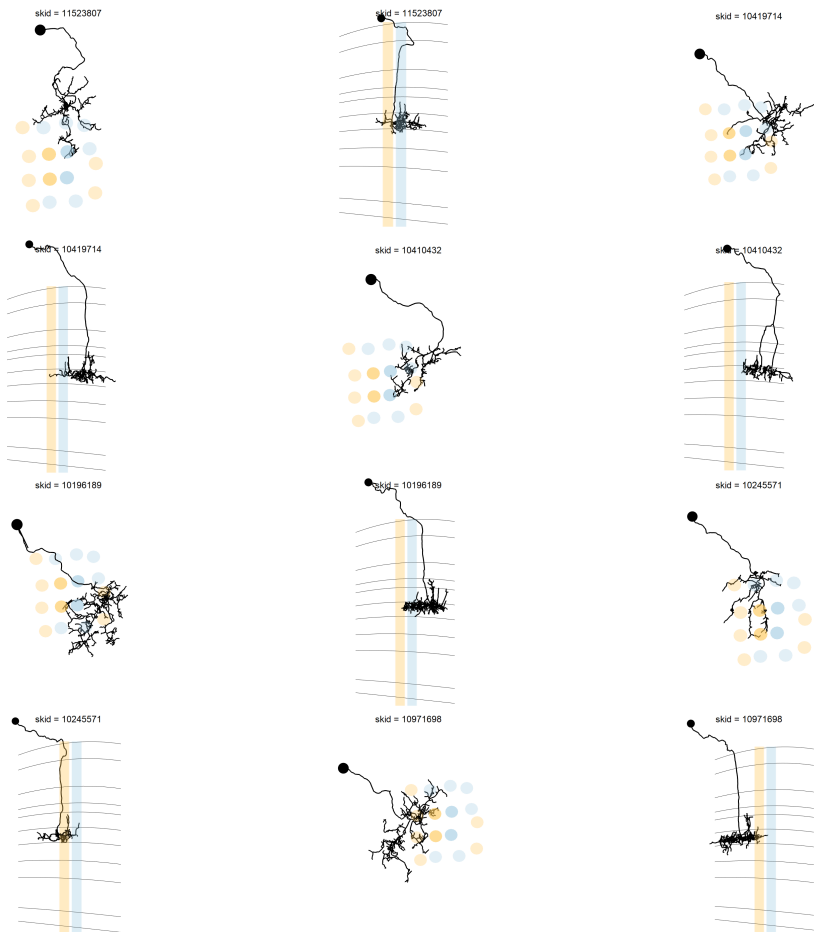

skid = 11445681

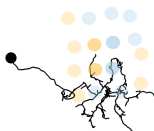

skid = 11445681

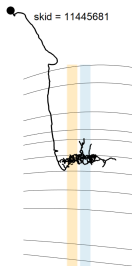

skid = 10995248

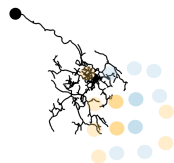

skid = 10995248

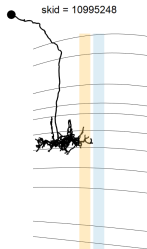

# Central seed column MeTu (7 cells)

skid = 10409863

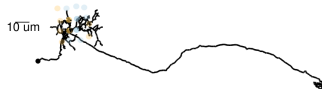

skid = 10409863

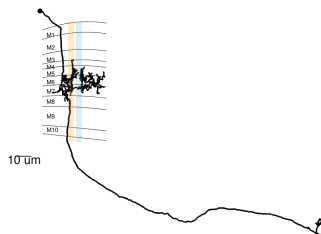

skid = 11455122

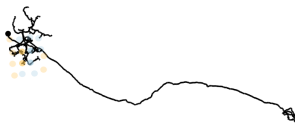

skid = 11455122

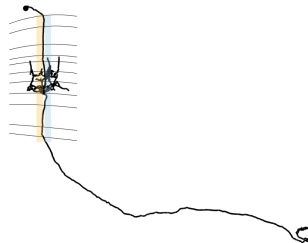

skid = 11455156

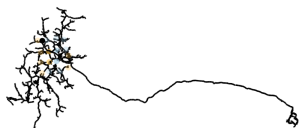

skid = 11455156

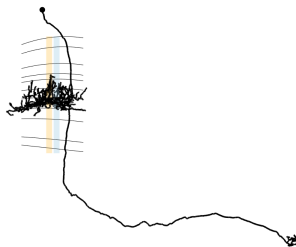

skid = 10409692

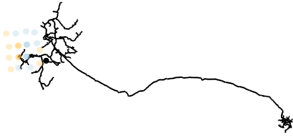

skid = 10409692

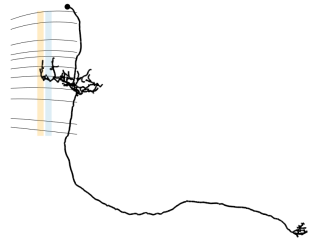

skid = 11448395

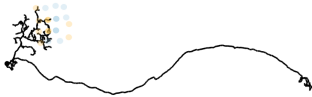

skid = 11448395

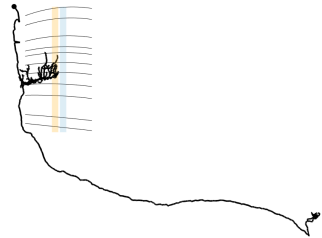

skid = 11455112

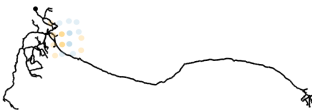

skid = 11455112

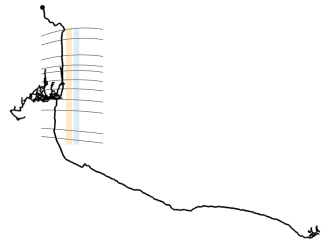



skid = 11499693

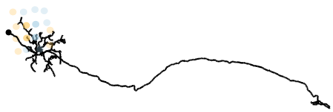

skid = 11499693

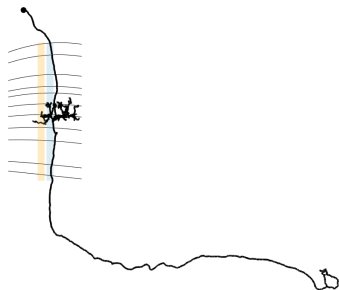

# Central seed column R7 (5 cells)

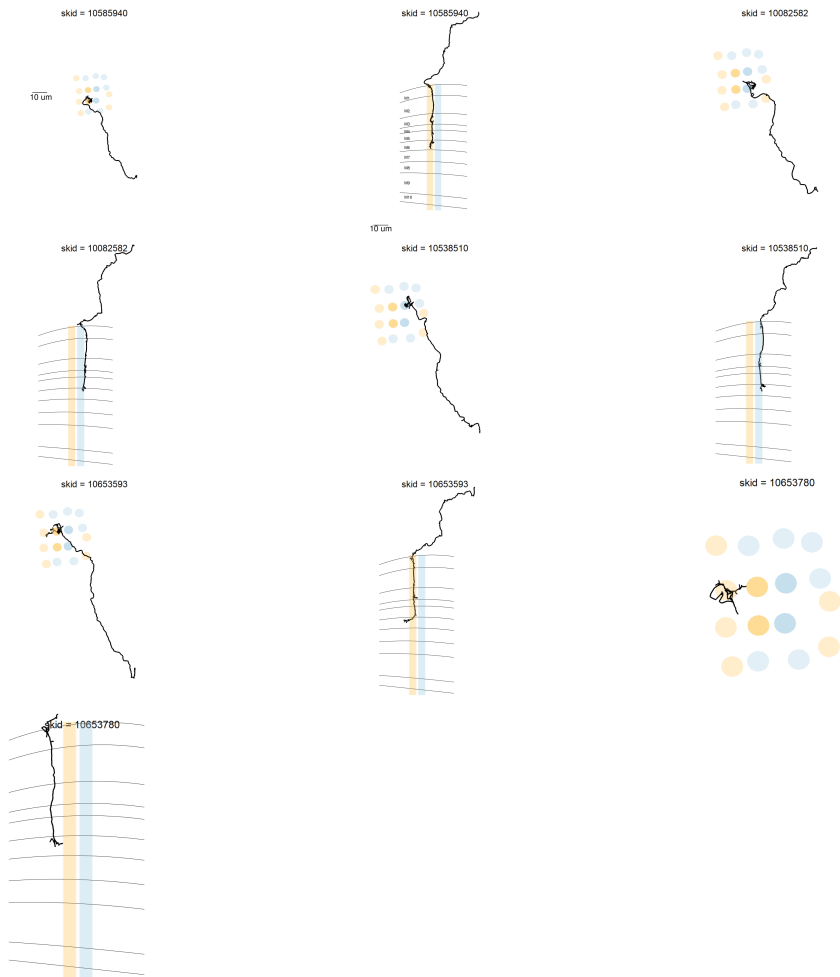

# Central seed column Tm5c (6 cells)

skid = 11450505

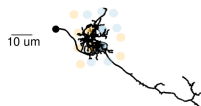

skid = 11450505

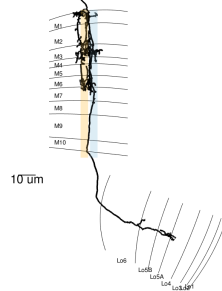

skid = 11470102

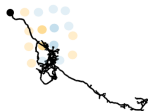

skid = 11470102

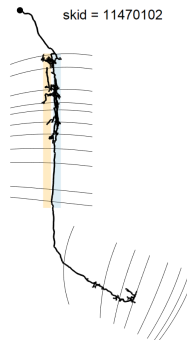

skid = 11449560

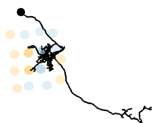

skid = 11449560

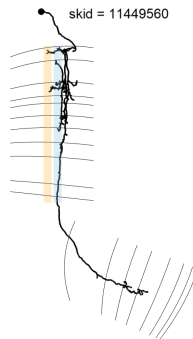

skid = 11574443

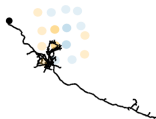

skid = 11473478

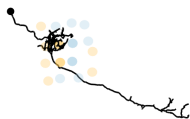

skid = 11485094

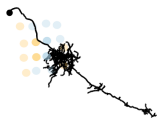

skid = 11574443

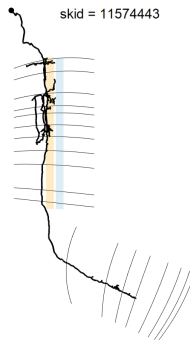

skid = 11473478

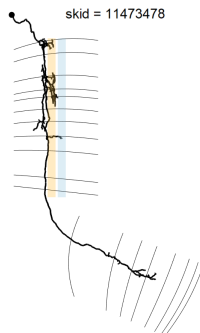

skid = 11485094

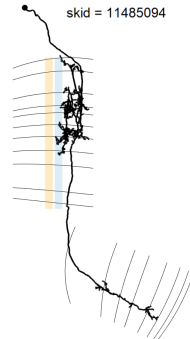

# Central seed column Tm20 (4 cells)

skid = 11444392

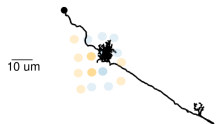

skid = 11444392

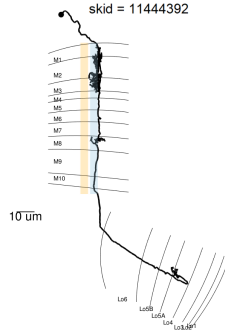

skid = 11450552

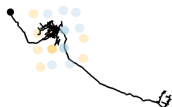

skid = 11450552

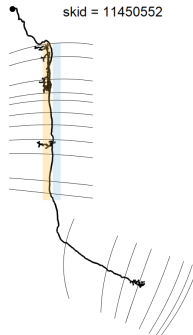

skid = 10423774

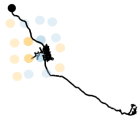

skid = 11473668

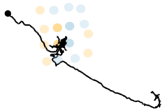

skid = 10423774

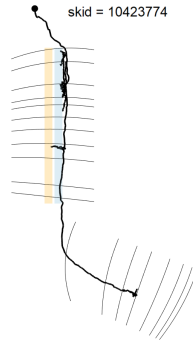

skid = 11473668

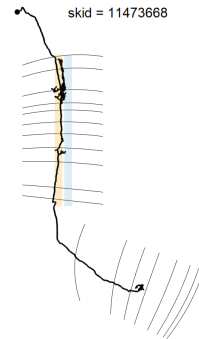

# Central seed column Mi15 (4 cells)

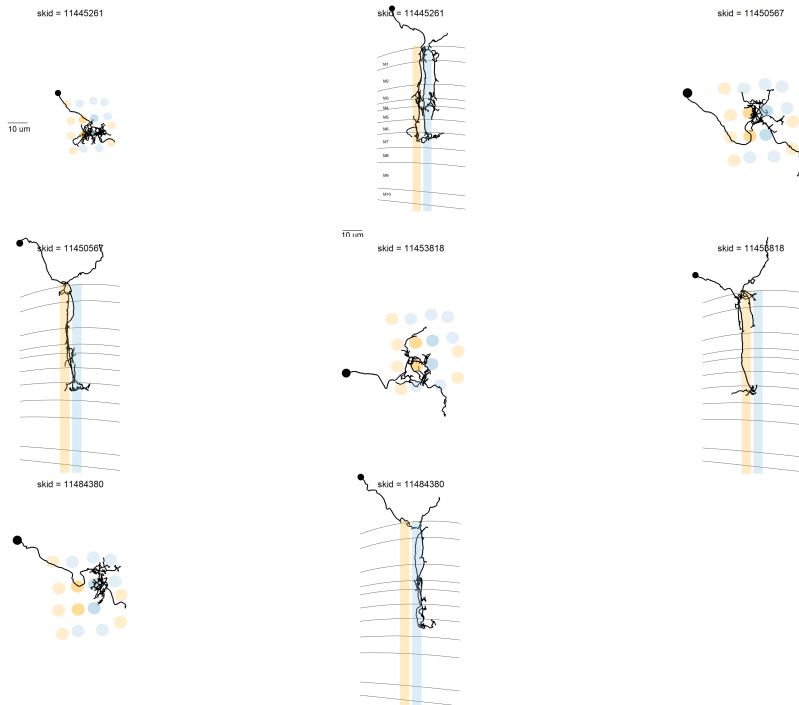

# Central seed column Mi4 (4 cells)

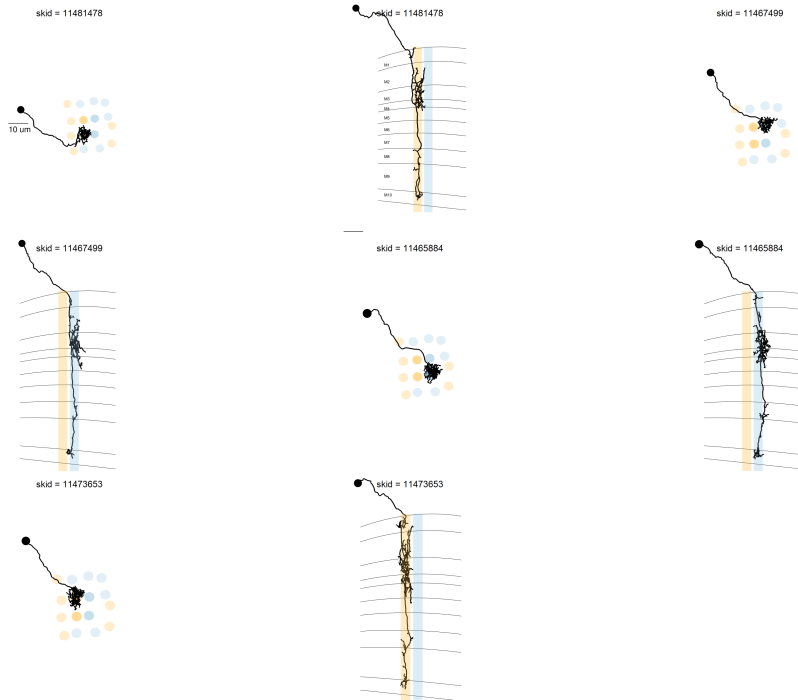



## Central seed column ML1 (4 cells)

skid = 11472157

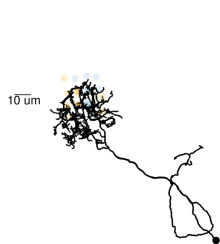

skid = 11472157

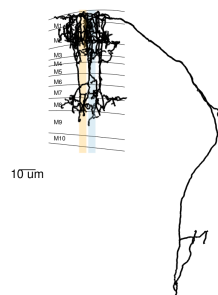

skid = 11458490

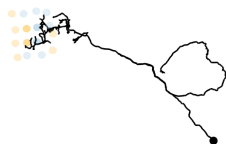

skid = 11458490

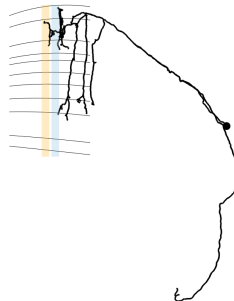

skid = 11471219

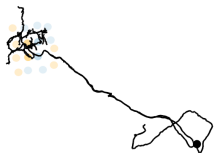

skid = 11471219

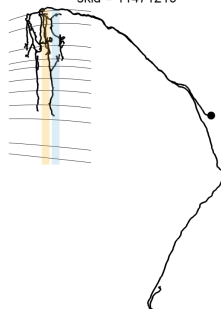

skid = 11458826

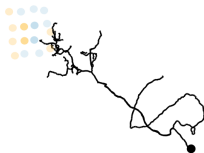

skid = 11458826

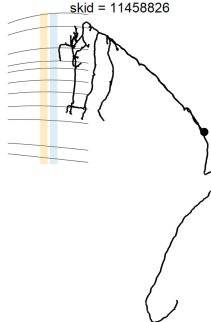

# Central seed column Dm2 (4 cells)

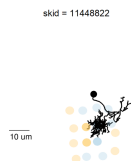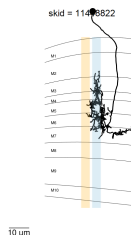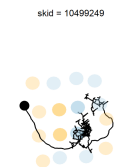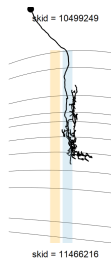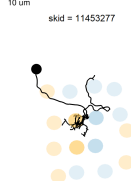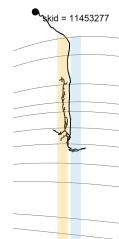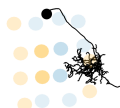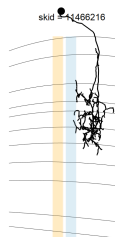

## Central seed column Dm11 (2 cells)

skid = 11450453

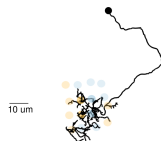

skid = 11450453

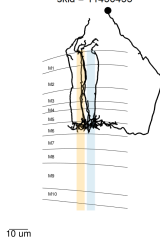

skid = 11444398

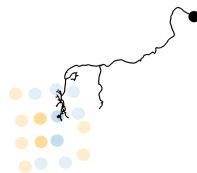

skid = 11444398

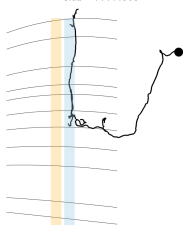

# Central seed column L3 (4 cells)

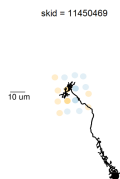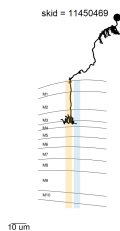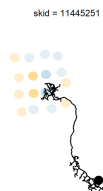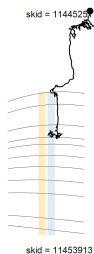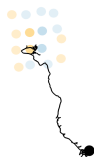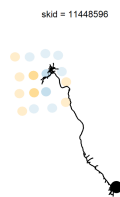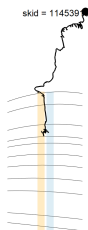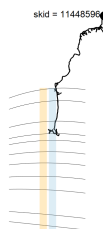

# Central seed column Mi1 (4 cells)

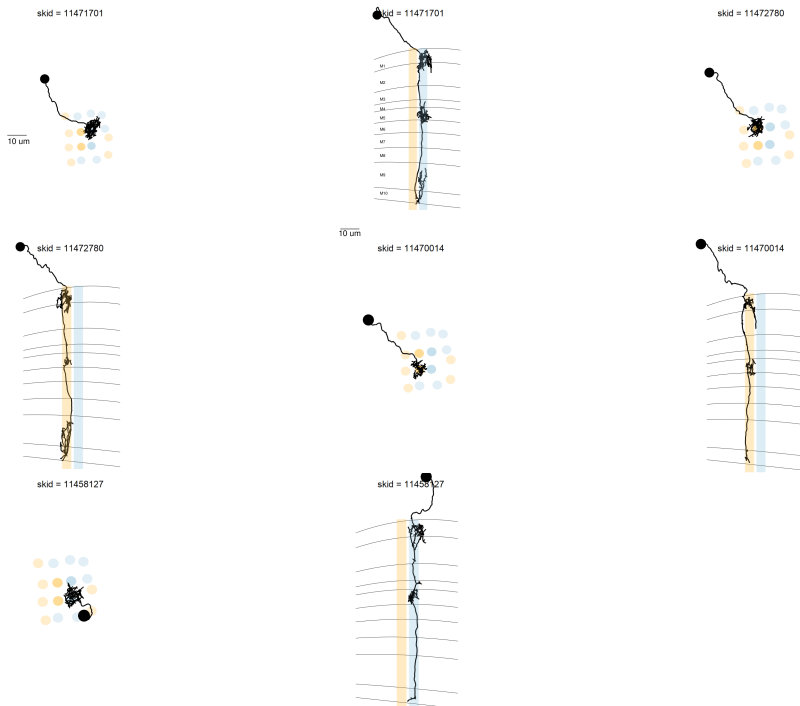

# Central seed column R8 (4 cells)

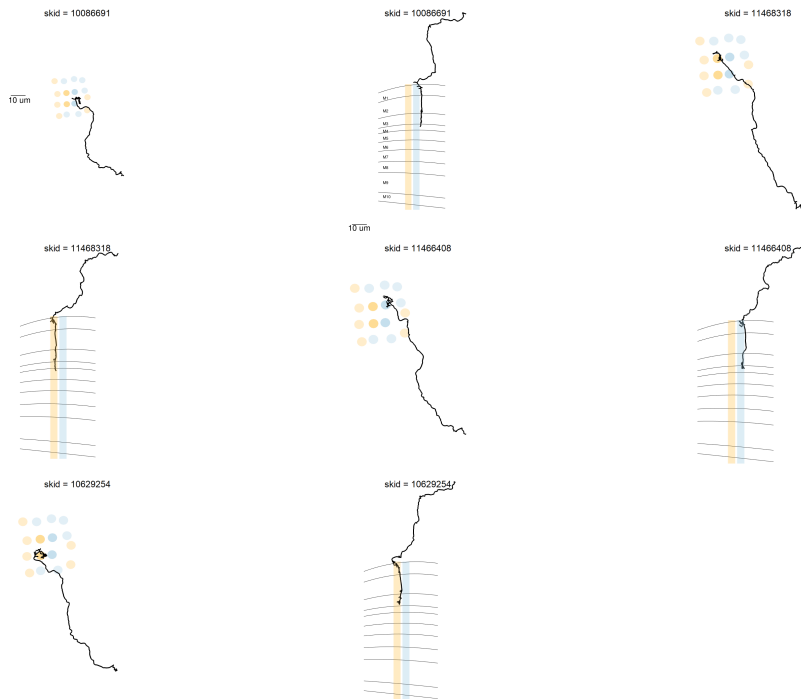

# Central seed column Tm5a (2 cells)

skid = 11447183

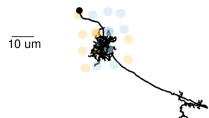

skid = 11447183

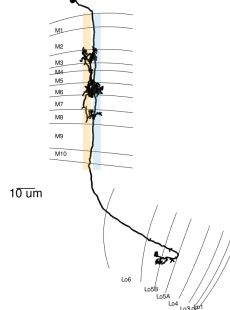

skid = 11453106

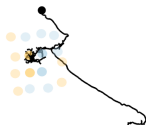

skid = 11453106

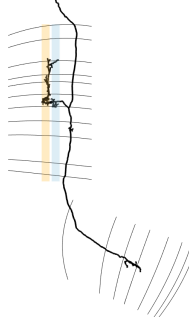



# Central seed column Tm5b (2 cells)

skid = 10356412

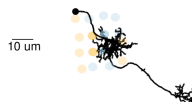

skid = 11448827

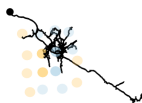

skid = 10356412

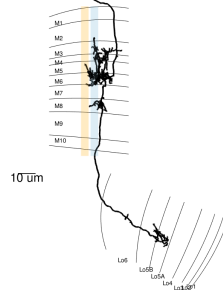

skid = 11448827

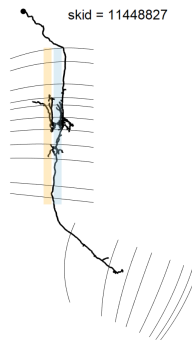

Central seed column Tm (9 cells)

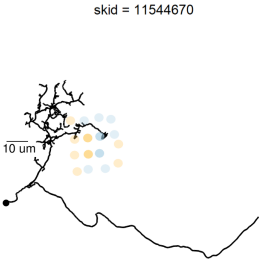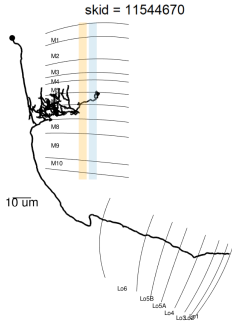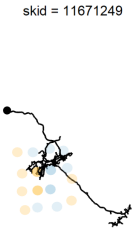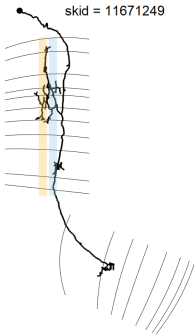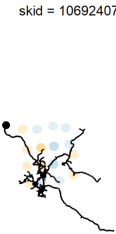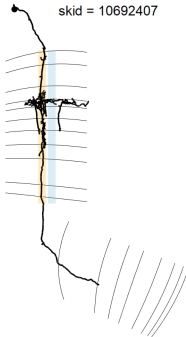

skid = 11474295

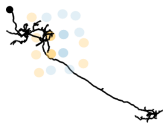

skid = 11458216

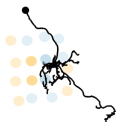

skid = 11455043

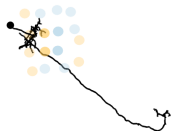

skid = 11474295

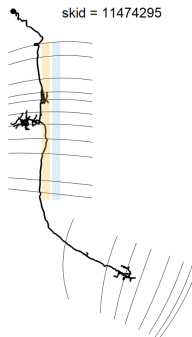

skid = 11458216

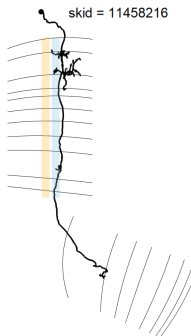

skid = 11455043

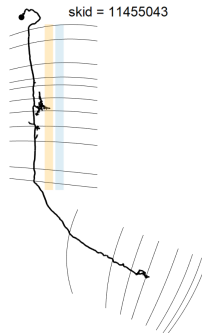

skid = 11445920

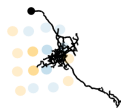

skid = 11459160

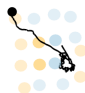

skid = 11450247

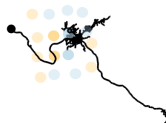

skid = 11445920

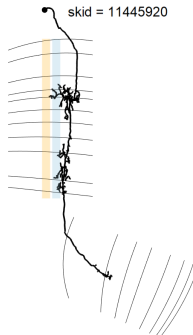

skid = 11459160

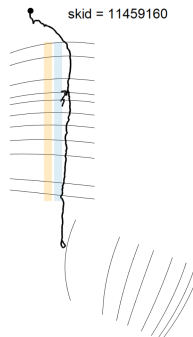

skid = 11450247

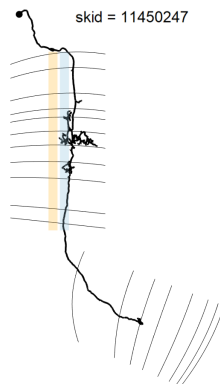

# Central seed column Tm5b-like (3 cells)

skid = 11447920

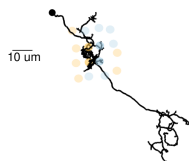

skid = 11447920

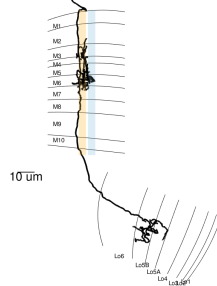

skid = 11447510

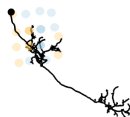

skid = 11447510

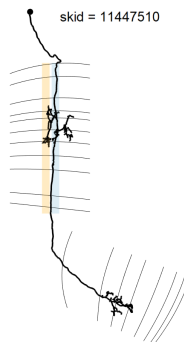

skid = 11468646

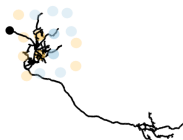

skid = 11468646

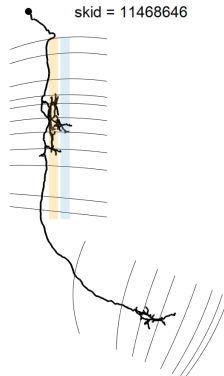

# Central seed column Mi9 (4 cells)

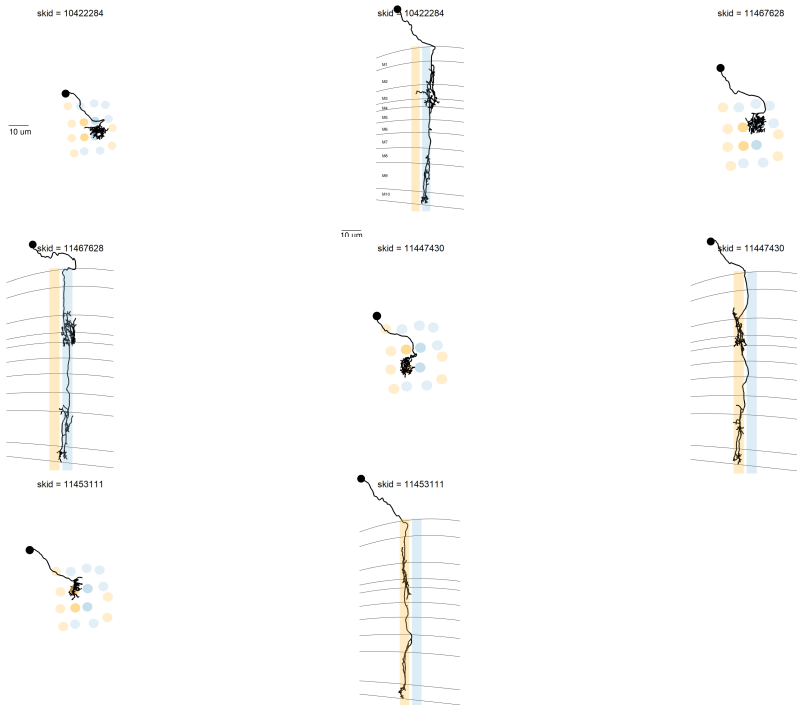

# Central seed column L1 (4 cells)

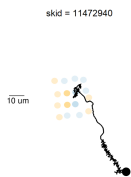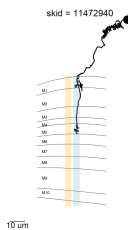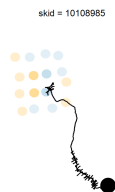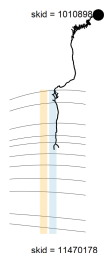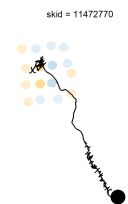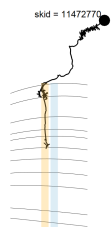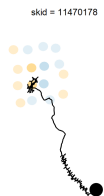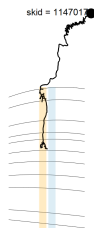

# Central seed column aMe12 (3 cells)

skid = 7038035

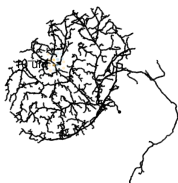

skid = 7038035

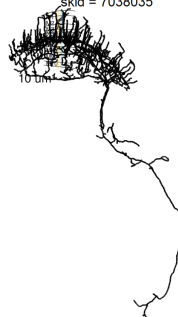

skid = 28841

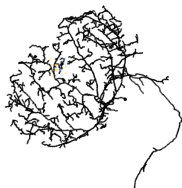

skid = 28841

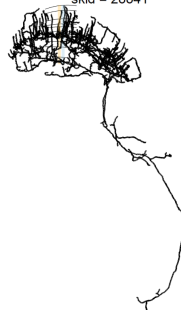

skid = 164544

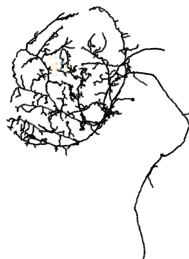

skid = 164544

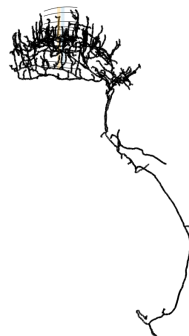



# Central seed column Dm (5 cells)

skid = 11511057

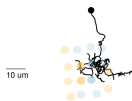

skid = 11511057

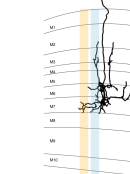

skid = 11448962

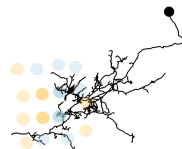

skid = 11448962

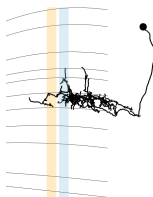

skid = 11474156

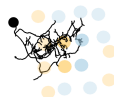

skid = 11474156

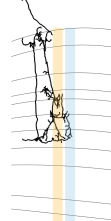

skid = 10106710

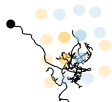

skid = 10106710

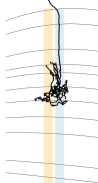

skid = 11455001

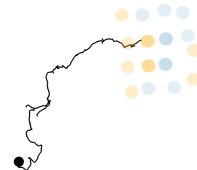

skid = 11455001

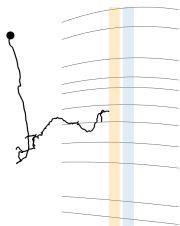

# Central seed column ML-VPN1 (3 cells)

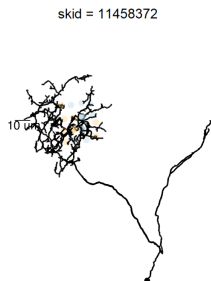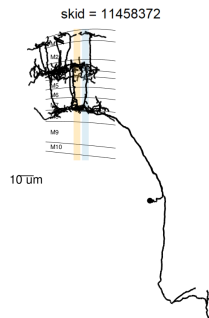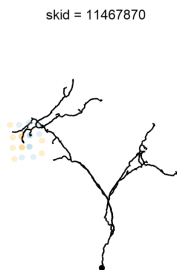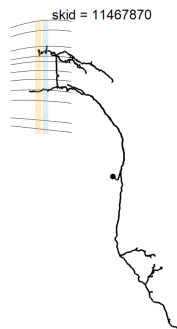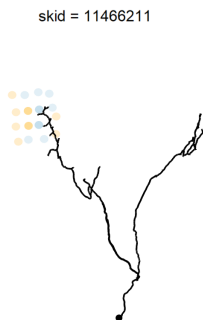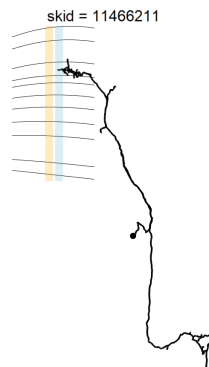

## Central seed column C2 (2 cells)

skid = 11453787

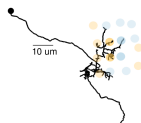

skid = 11453787

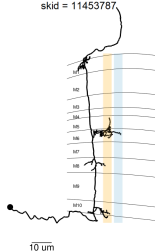

skid = 11456776

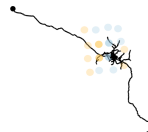

skid = 11456776

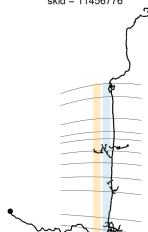

## Central seed column Mt-VPN (4 cells)

skid = 11453464

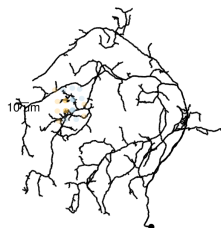

skid = 11453464

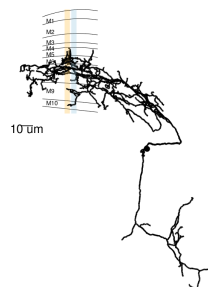

skid = 11469481

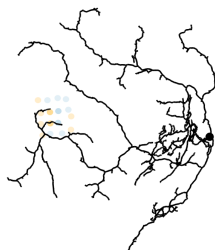

skid = 11469481

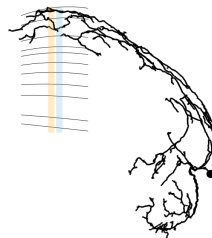

skid = 14286406

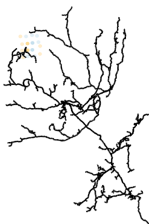

skid = 14286406

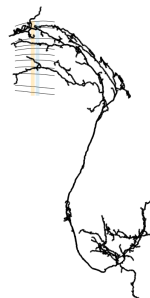

skid = 3509520

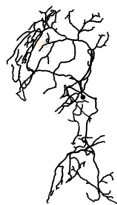

skid = 3509520

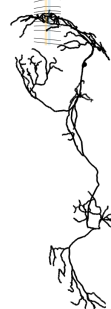

## Central seed column Mti (3 cells)

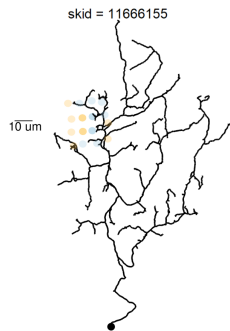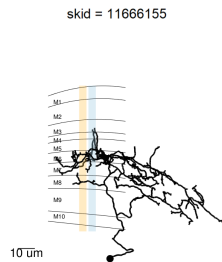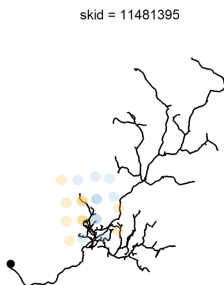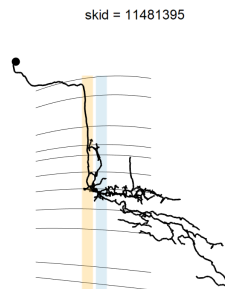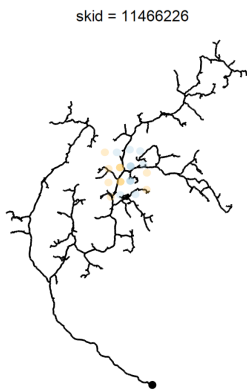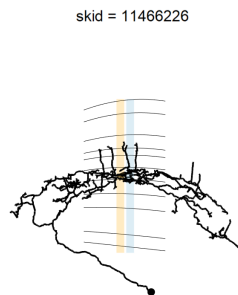

## Central seed column Tm5a-like (1 cell)

skid = 11481724

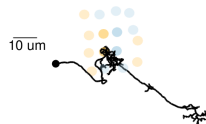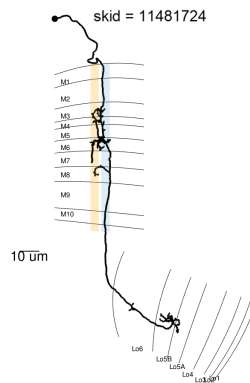

## Central seed column TmY10 (1 cell)

skid = 11449411

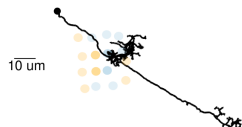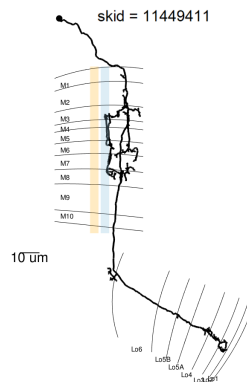

## Central seed column Mi10 (1 cell)

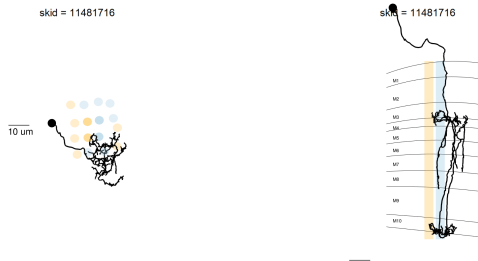

## Central seed column Mi (1 cell)

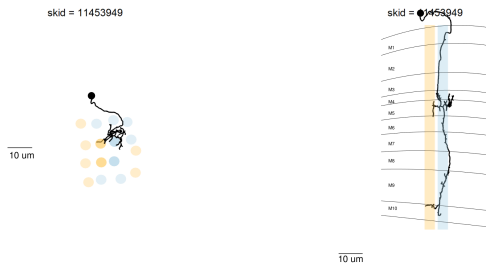

## Central seed column C3 (1 cell)

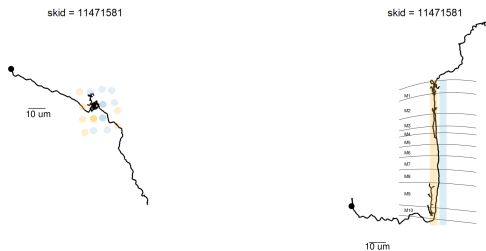



# Central seed column Identified < 3 synapses (26 cells)

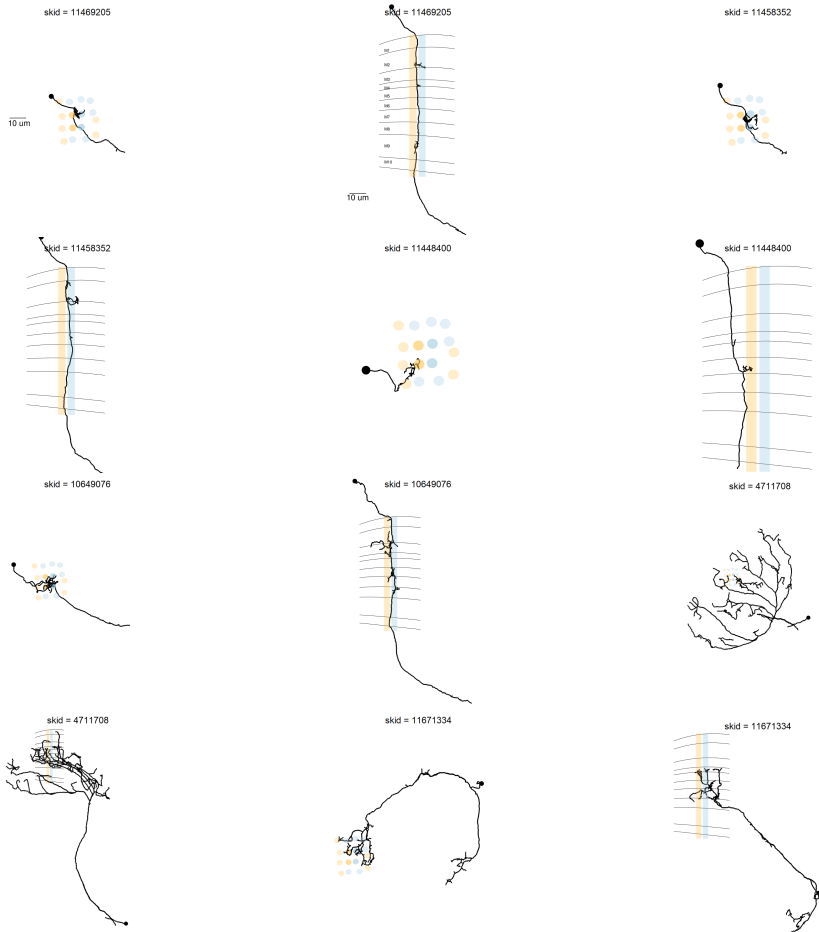

skid = 14838259

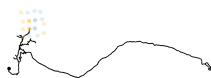

skid = 14838259

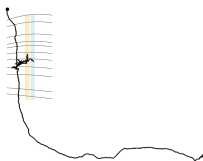

skid = 11449694

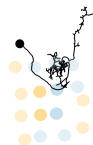

skid = 11449694

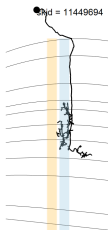

skid = 10562974

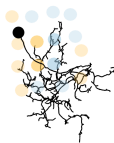

skid = 10562974

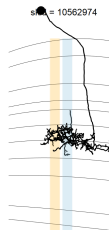

skid = 11472485

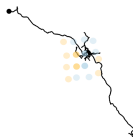

skid = 11472485

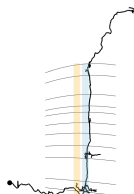

skid = 14359934

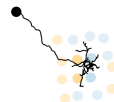

skid = 14359934

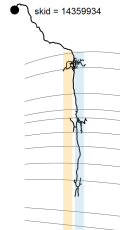

skid = 14653782

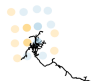

skid = 14653782

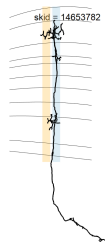

skid = 14767205

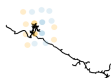

skid = 14767205

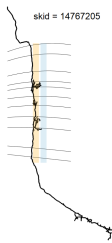

skid = 15805231

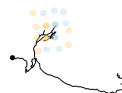

skid = 15805231

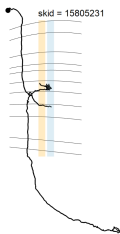

skid = 11749585

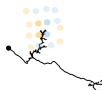

skid = 11749585

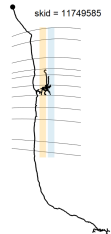

skid = 10657484

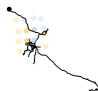

skid = 10657484

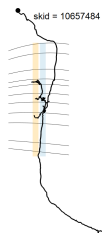

skid = 11454503

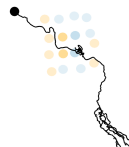

skid = 11454503

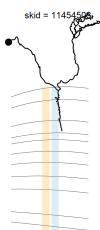

skid = 14746351

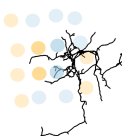

skid = 14746351

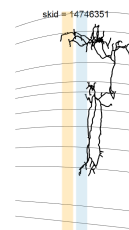

skid = 14880472

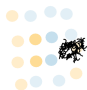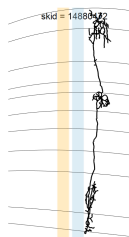

skid = 14880472

skid = 10656250

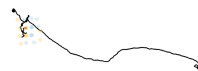

skid = 10656250

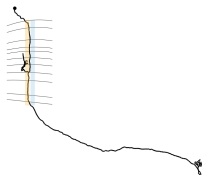

skid = 14624795

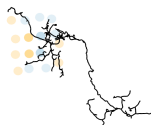

skid = 14624795

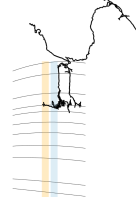

skid = 11723759

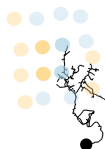

skid = 11723759

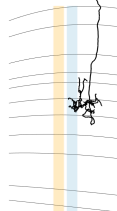

skid = 10638022

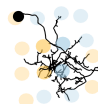

skid = 10638022

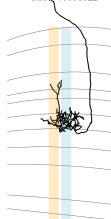

skid = 10537970

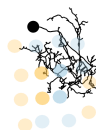

skid = 10537970

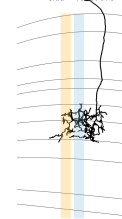

## Central seed column Unidentified $\geq 3$ synapses (2 cells)

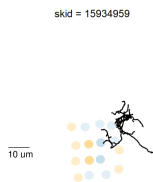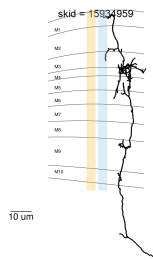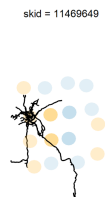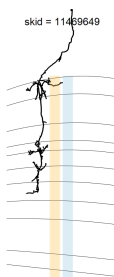

# Central seed column Unidentified < 3 synapses (62 cells)

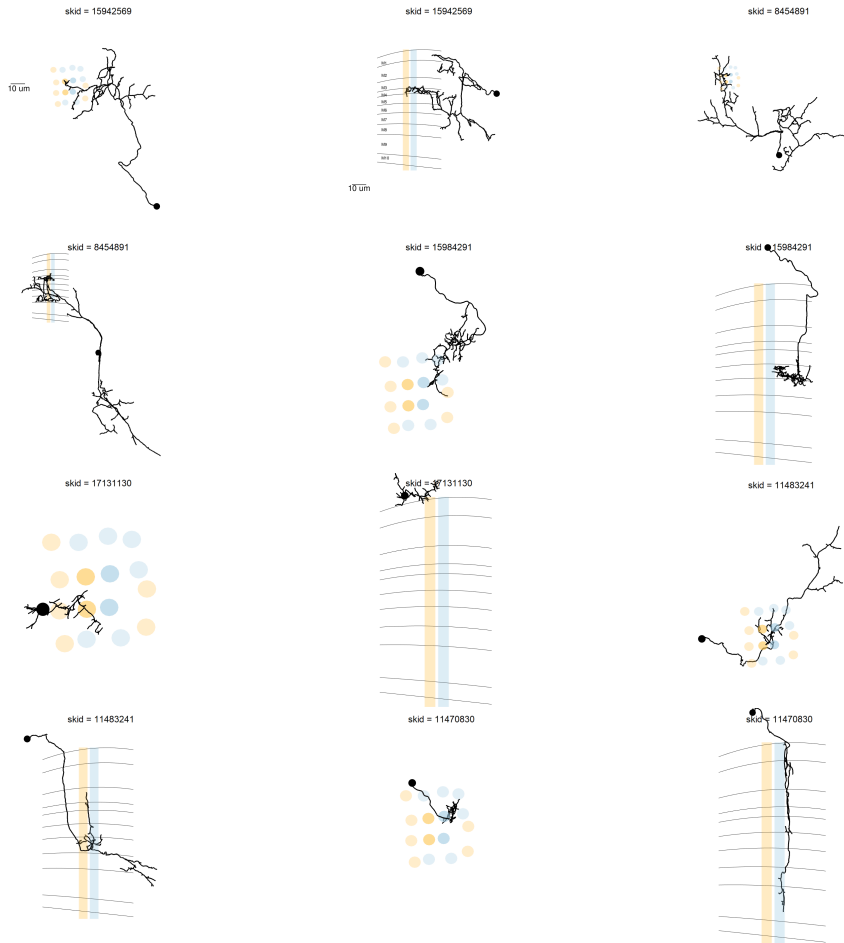

skid = 11326961

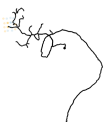

skid = 11326961

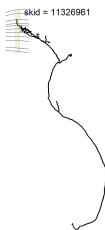

skid = 10563216

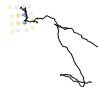

skid = 10563216

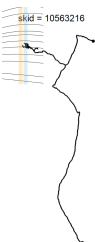

skid = 17131176

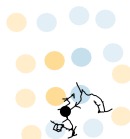

skid = 17131176

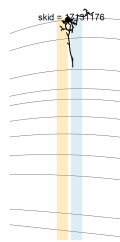

skid = 15901692

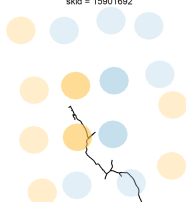

skid = 15901692

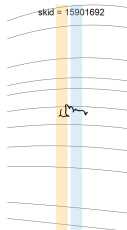

skid = 11598592

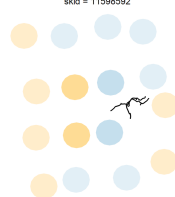

skid = 11598592

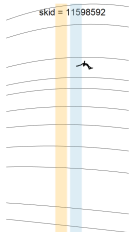

skid = 11512293

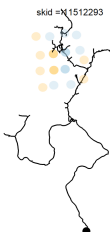

skid = 11512293

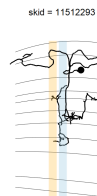

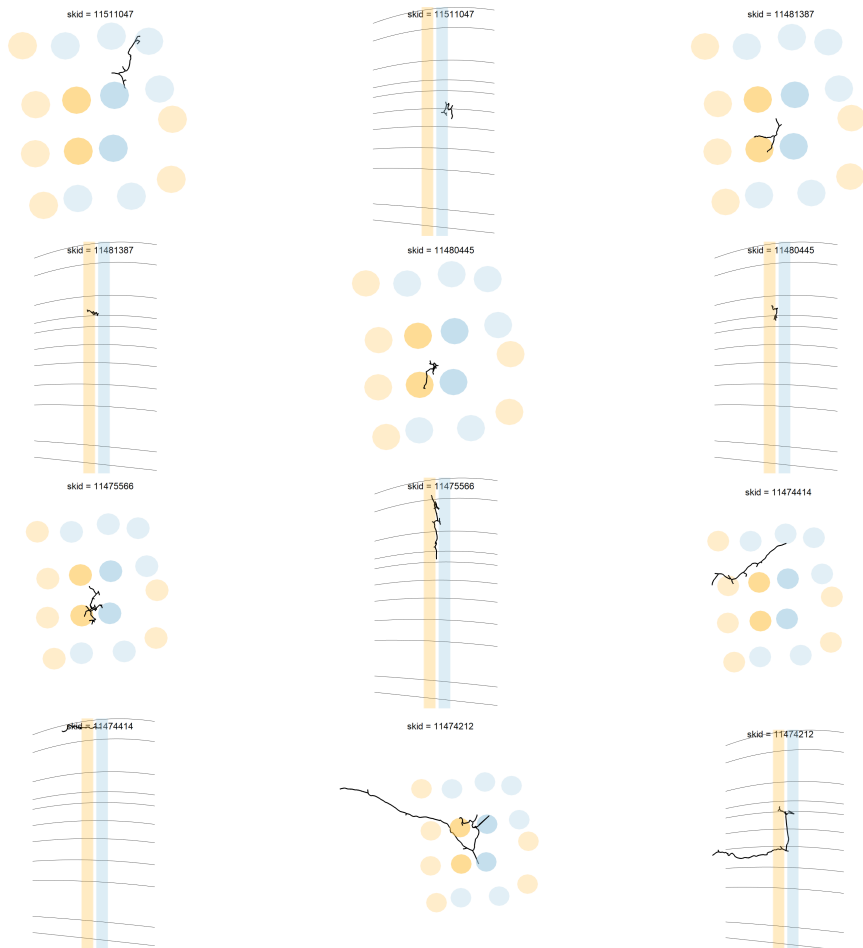



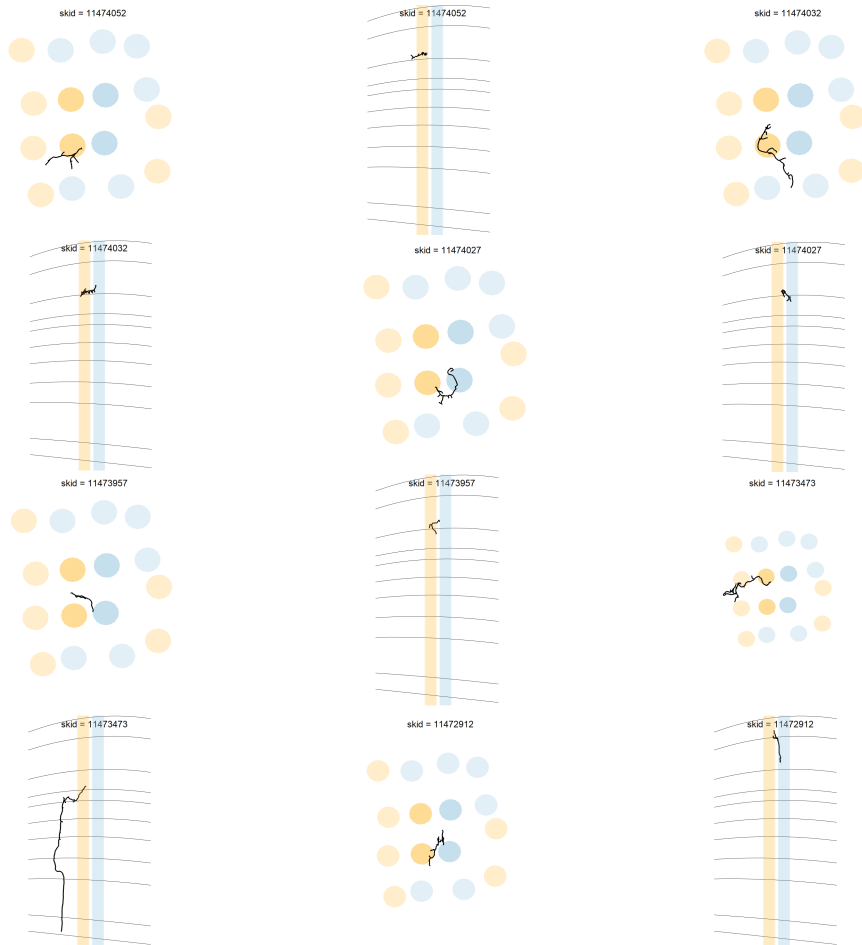

skid = 11471812

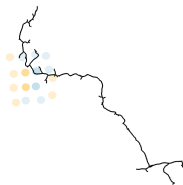

skid = 11471812

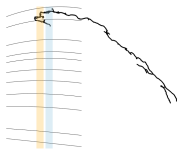

skid = 11471527

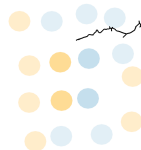

skid = 11471527

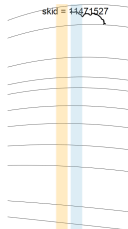

skid = 11469560

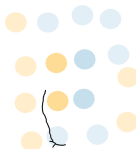

skid = 11469591

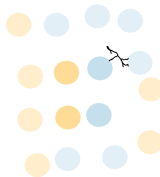

skid = 11469560

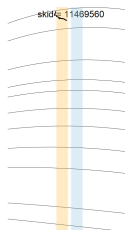

skid = 11469591

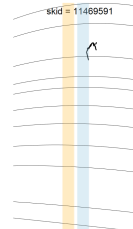

skid = 11468661

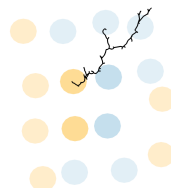

skid = 11468661

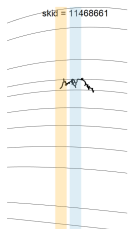

skid = 11467898

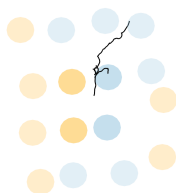

skid = 11467898

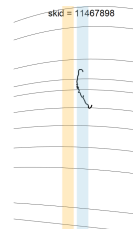

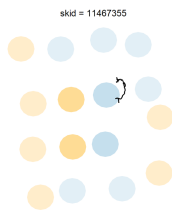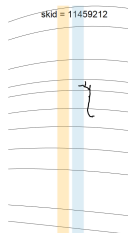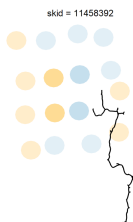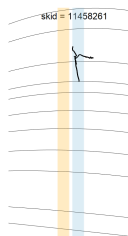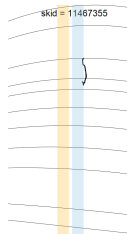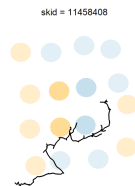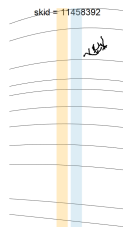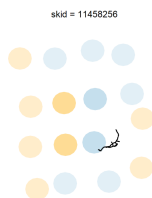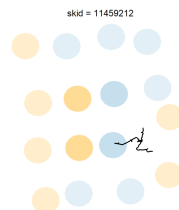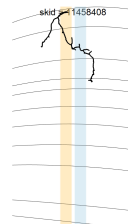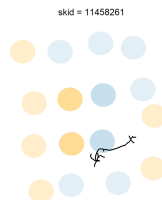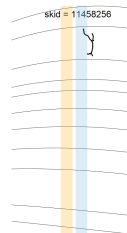

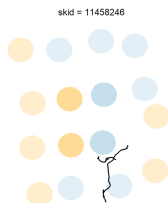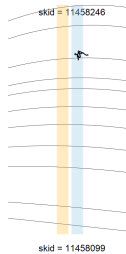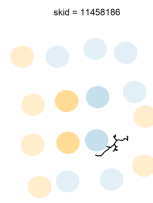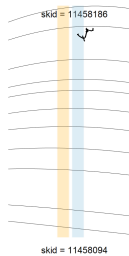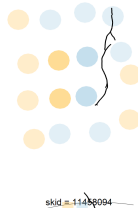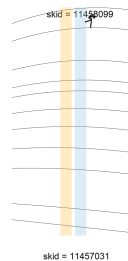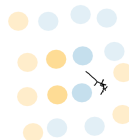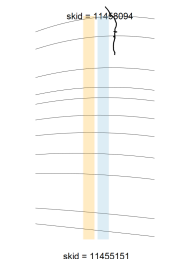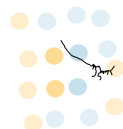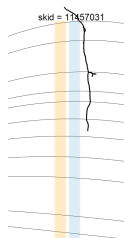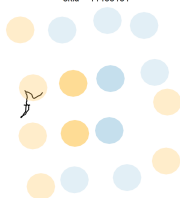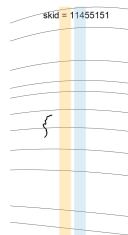

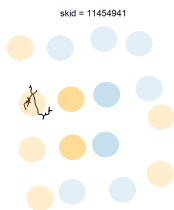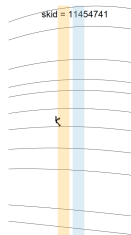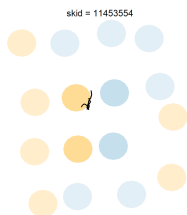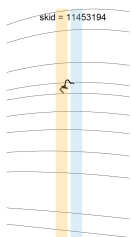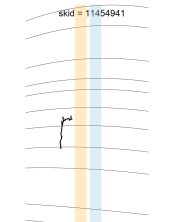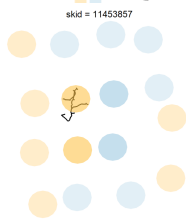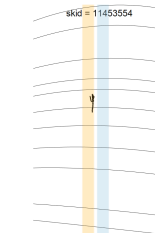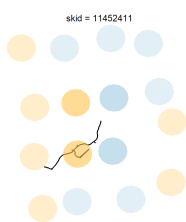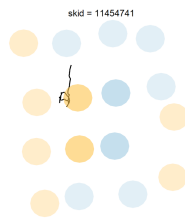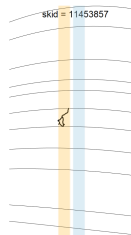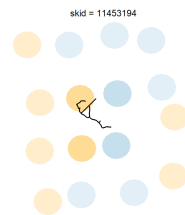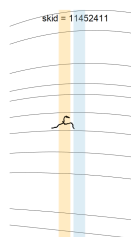

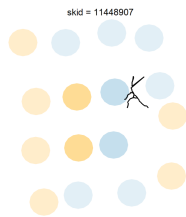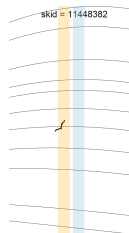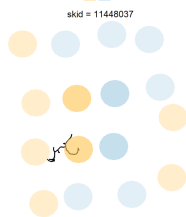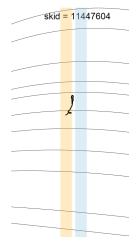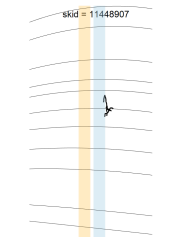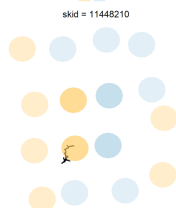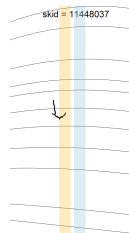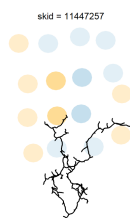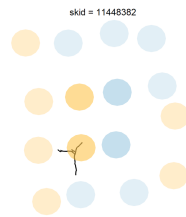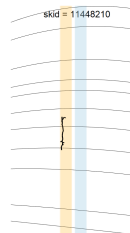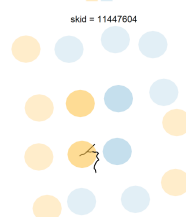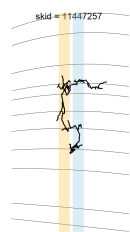

skid = 11446423

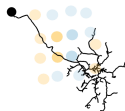

skid = 11446423

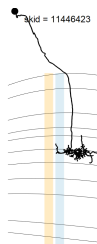

skid = 15901648

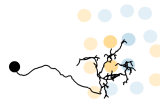

skid = 15901648

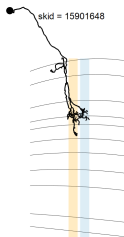

# DRA seed column Dm-DRA1 (20 cells)

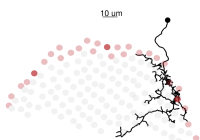

skid = 10440160

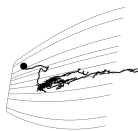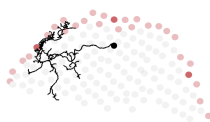

skid = 11896101

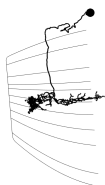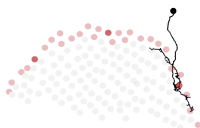

skid = 16766812

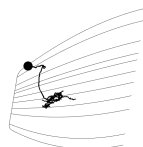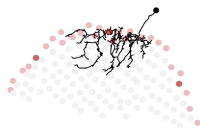

skid = 12106449

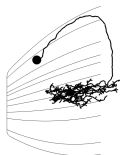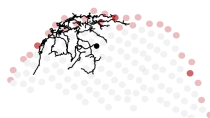

skid = 10247370

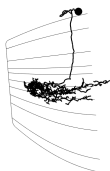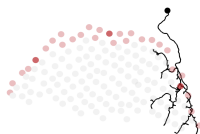

skid = 17156427

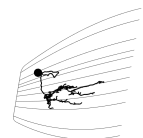



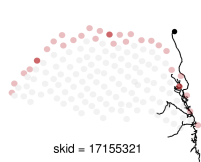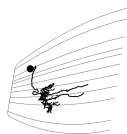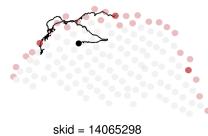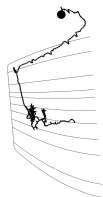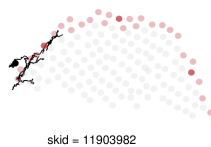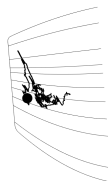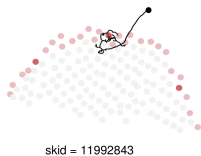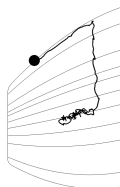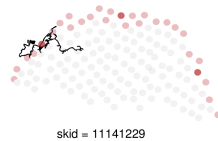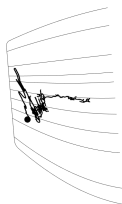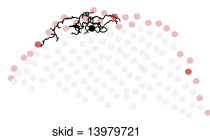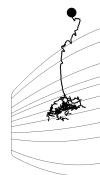

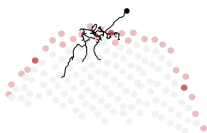

skid = 11993798

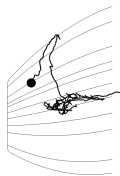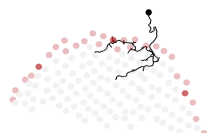

skid = 11993076

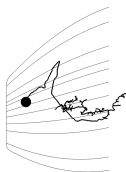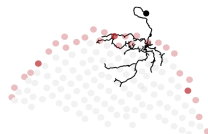

skid = 13607720

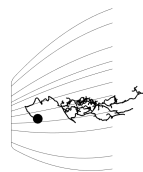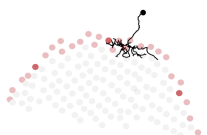

skid = 11769714

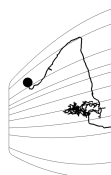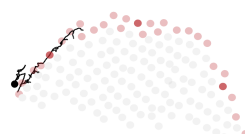

skid = 15976817

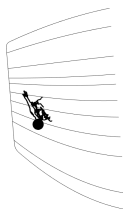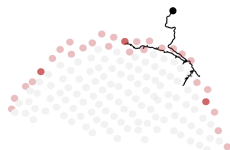

skid = 11993695

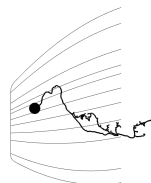

# DRA seed column Dm9 (6 cells)

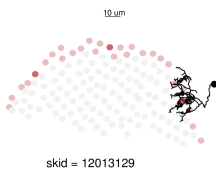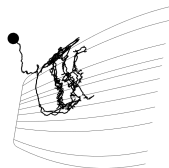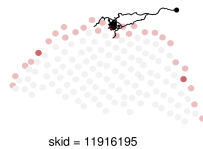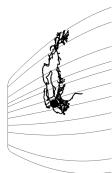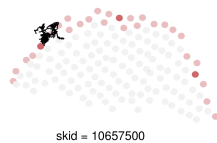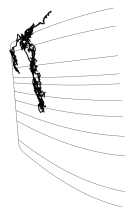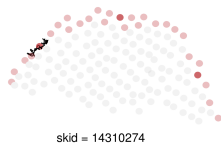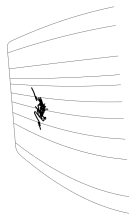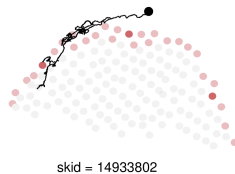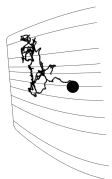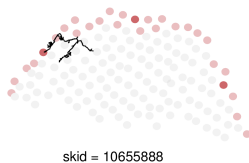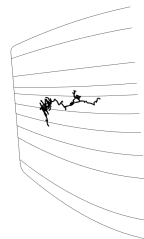

# DRA seed column MeTu-DRA (30 cells)

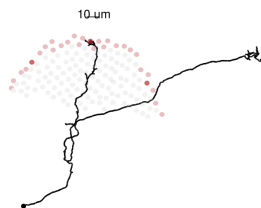

skid = 11995073

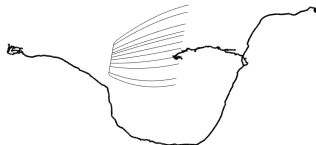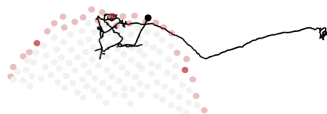

skid = 11994448

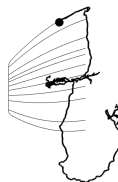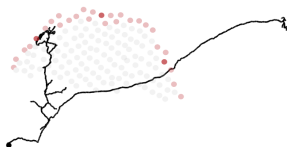

skid = 11908710

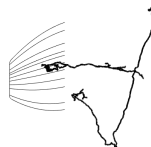

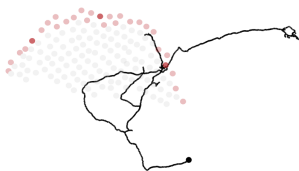

skid = 11695293

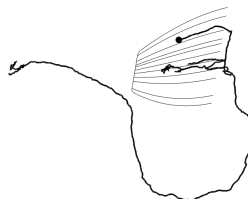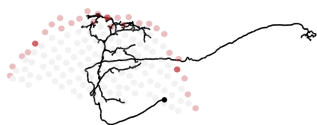

skid = 15749047

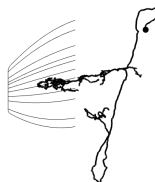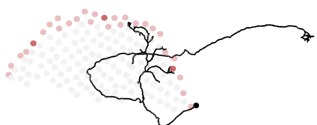

skid = 12106383

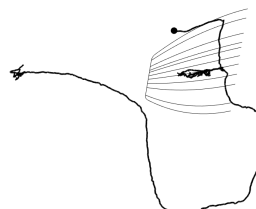

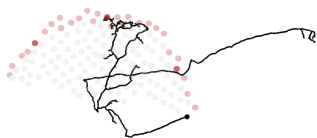

skid = 11994563

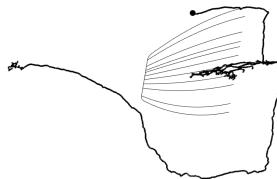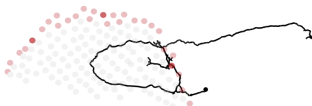

skid = 10438339

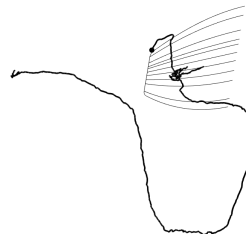

Lorem ipsum

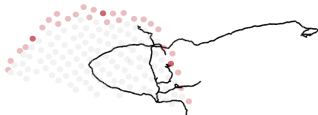

skid = 15952007

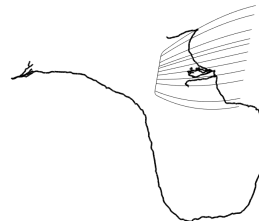

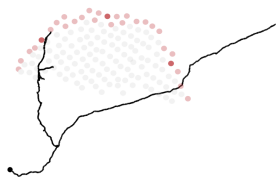

skid = 13136156

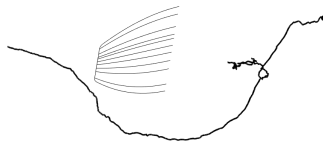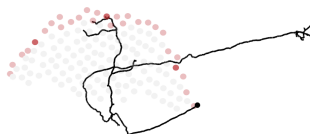

skid = 11995102

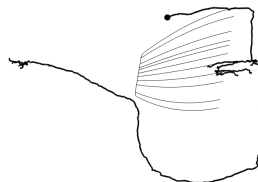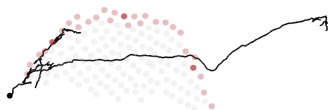

skid = 15616477

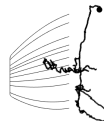

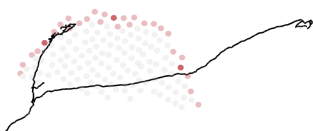

skid = 15600898

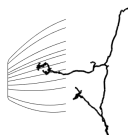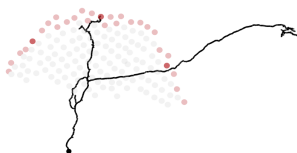

skid = 11993030

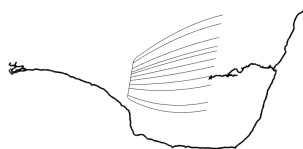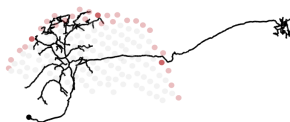

skid = 15698953

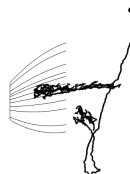



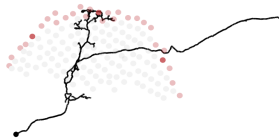

skid = 12127369

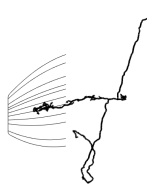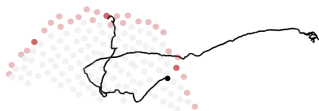

skid = 11993382

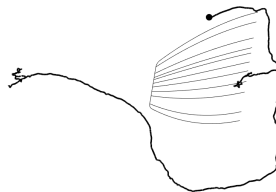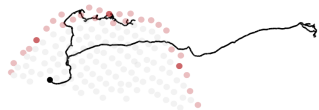

skid = 11992932

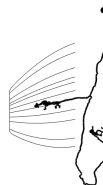

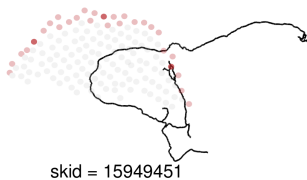

skid = 15949451

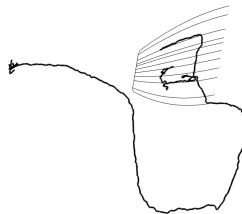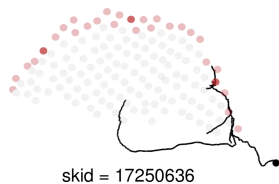

skid = 17250636

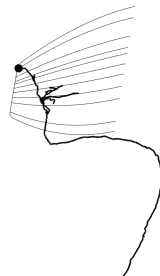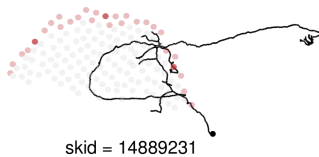

skid = 14889231

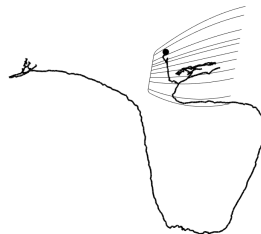

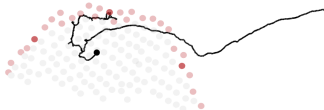

skid = 11995358

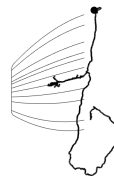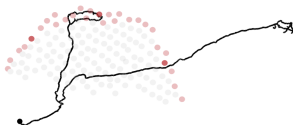

skid = 11993352

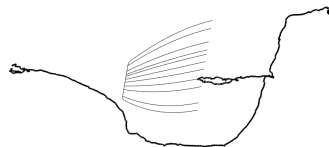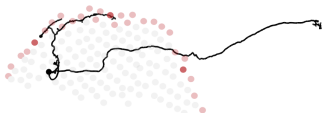

skid = 11993314

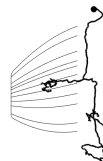

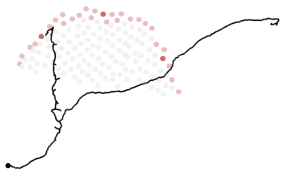

skid = 11908743

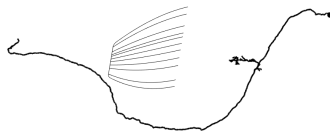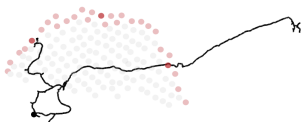

skid = 14864504

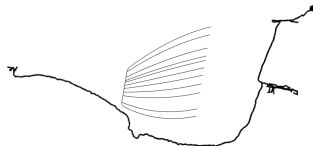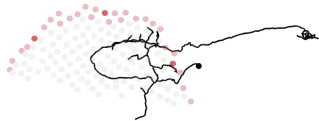

skid = 14936634

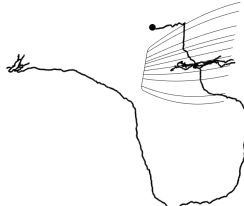

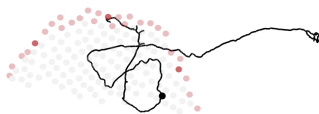

skid = 11993064

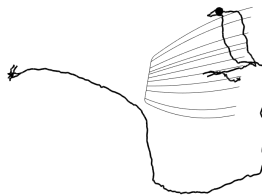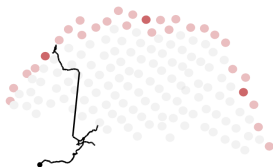

skid = 11908668

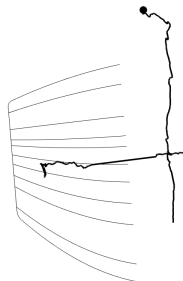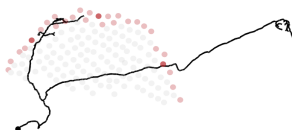

skid = 11903992

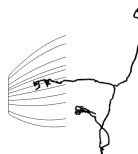

## DRA seed column R7-DRA (3 cells)

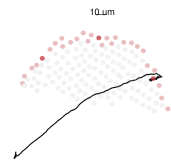

skid = 11728779

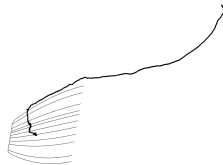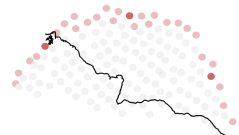

skid = 10300949

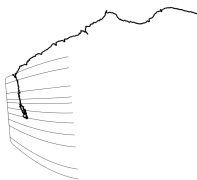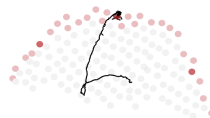

skid = 10191735

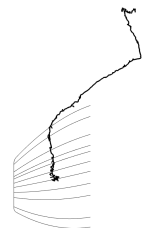

# DRA seed column Dm-DRA2 (9 cells)

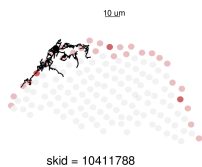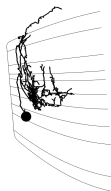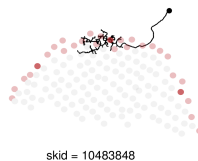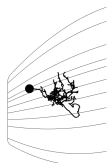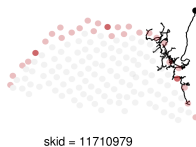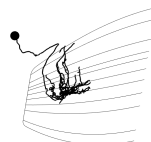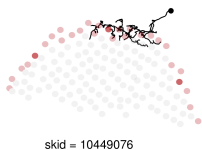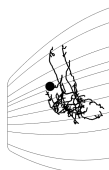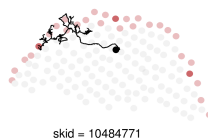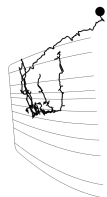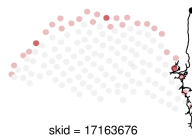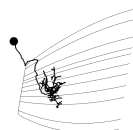

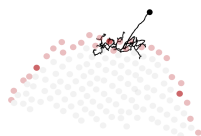

skid = 13262259

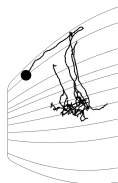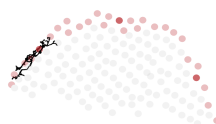

skid = 14311483

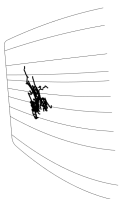



## DRA seed column Dm2 (4 cells)

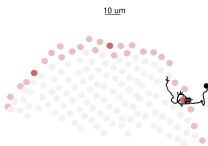

skid = 17162382

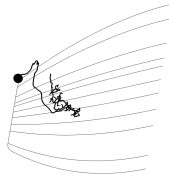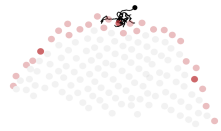

skid = 11918130

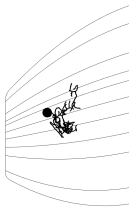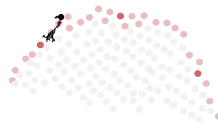

skid = 14065353

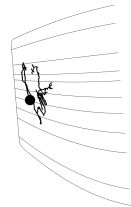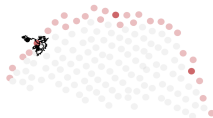

skid = 10655668

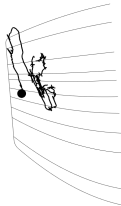

## DRA seed column R8-DRA (3 cells)

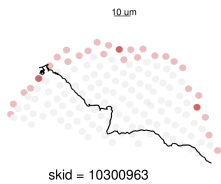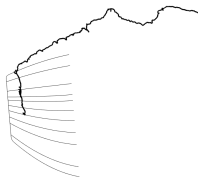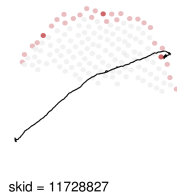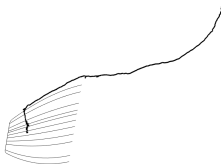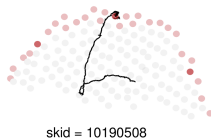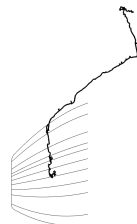

## DRA seed column Mi15 (4 cells)

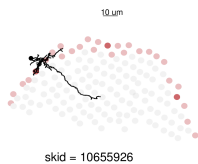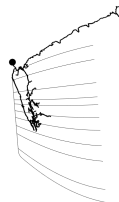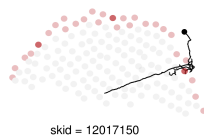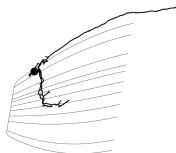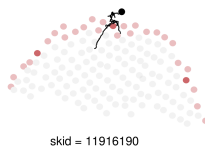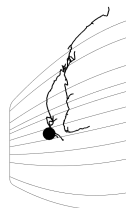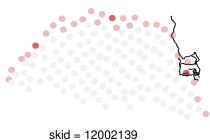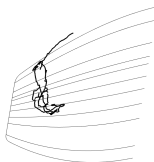

# DRA seed column Mti-DRA-1 (6 cells)

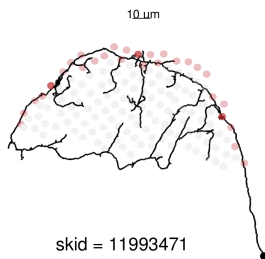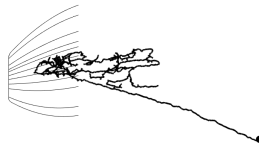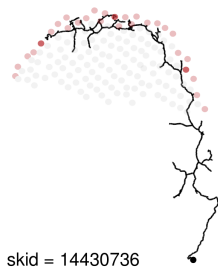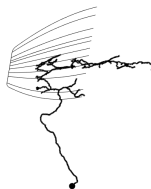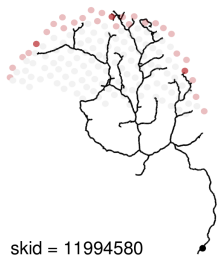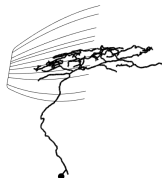

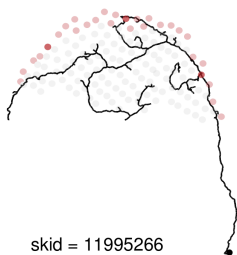

skid = 11995266

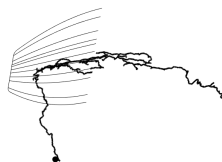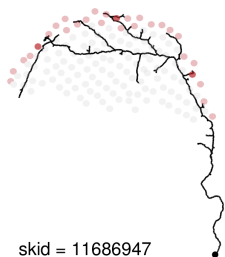

skid = 11686947

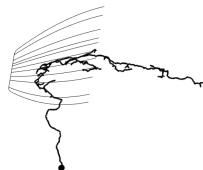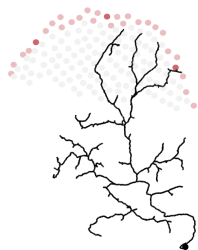

skid = 10474753

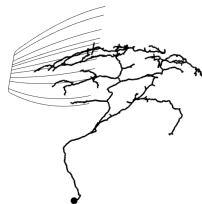

## DRA seed column MeMe-DRA (2 cells)

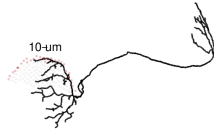

skid = 10439442

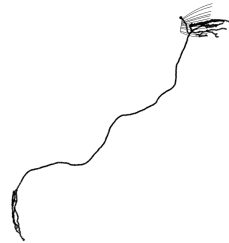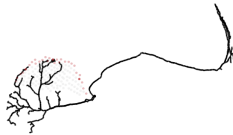

skid = 11993543

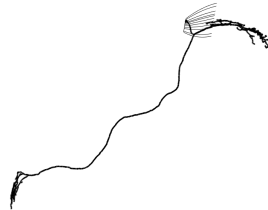

## DRA seed column L3 (3 cells)

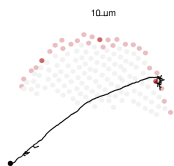

skid = 12018069

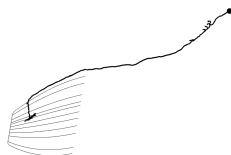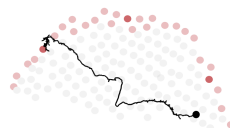

skid = 10653985

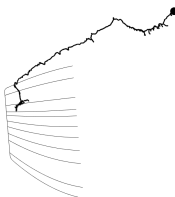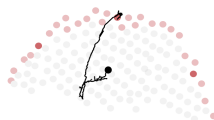

skid = 11917227

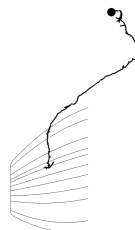

## DRA seed column VPN-DRA (6 cells)

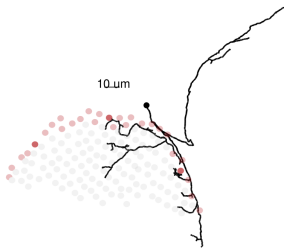

skid = 11992907

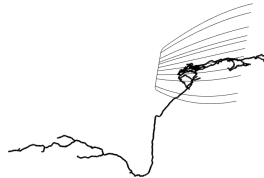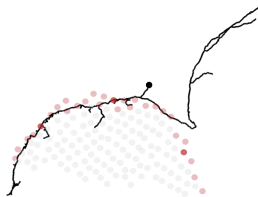

skid = 11904073

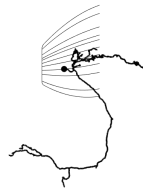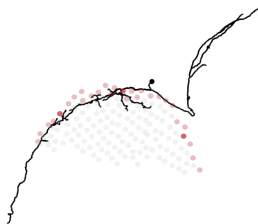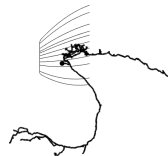



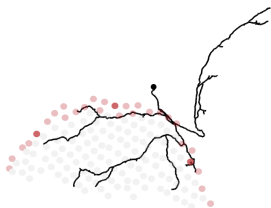

skid = 17165715

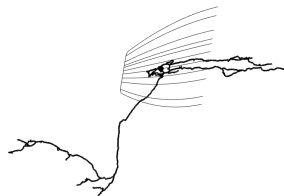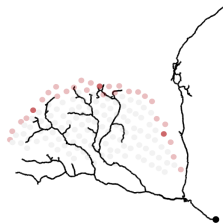

skid = 15969128

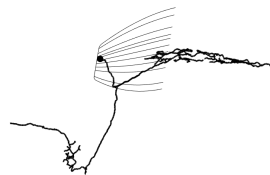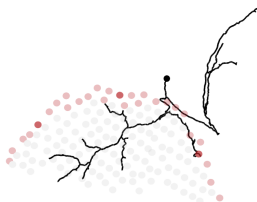

skid = 16886430

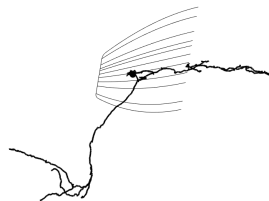

## DRA seed column L1 (3 cells)

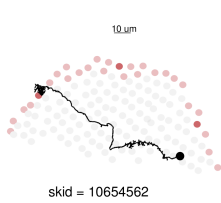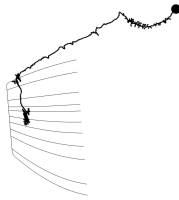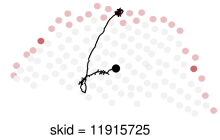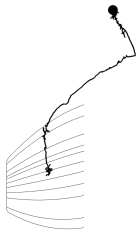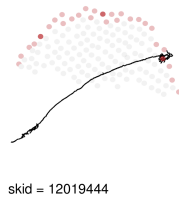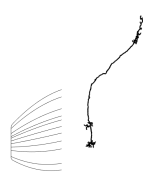

# DRA seed column Tm20 (3 cells)

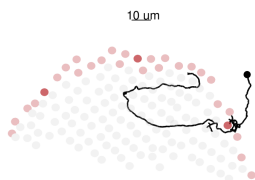

skid = 12018769

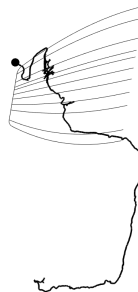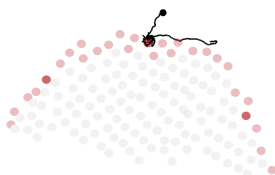

skid = 11918619

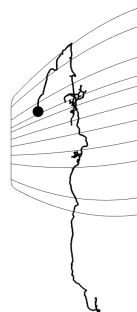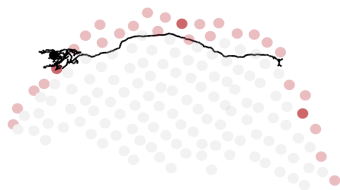

skid = 10655481

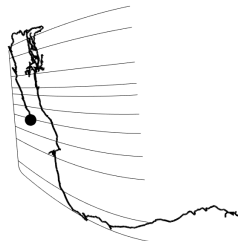

## DRA seed column Mti-DRA-2 (4 cells)

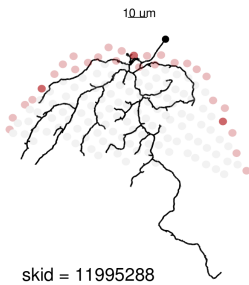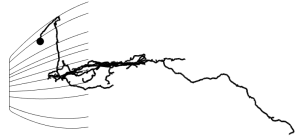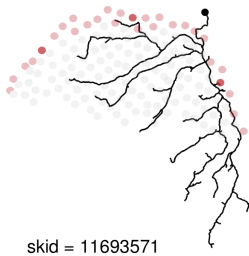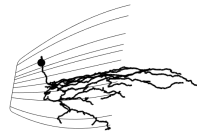

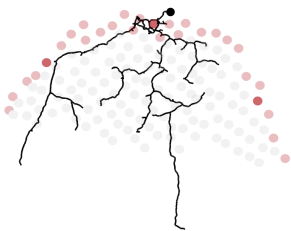

skid = 11993444

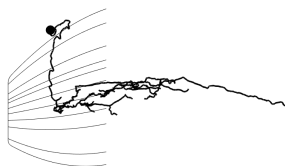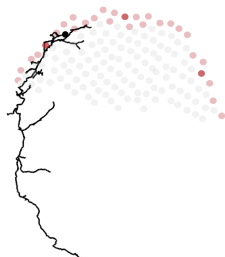

skid = 11903802

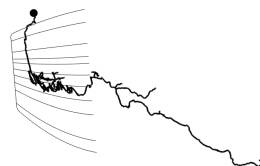

## DRA seed column Mi1 (3 cells)

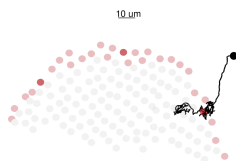

skid = 11829850

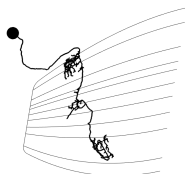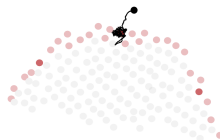

skid = 13294451

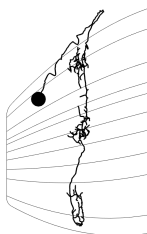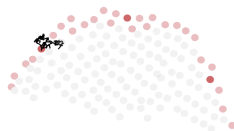

skid = 14811021

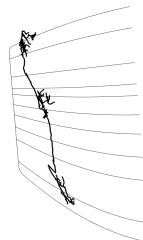

## DRA seed column MeTu (2 cells)

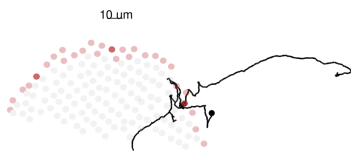

skid = 16730682

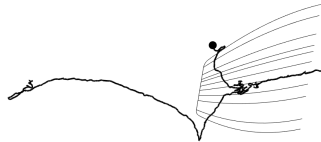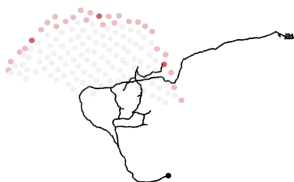

skid = 14888320

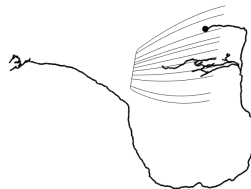

## DRA seed column Tm5-like (1 cell)

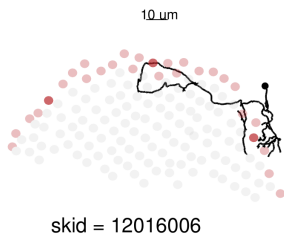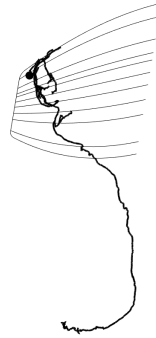

## DRA seed column Mi9 (2 cells)

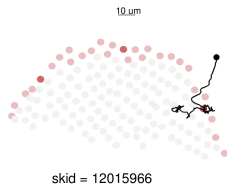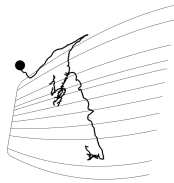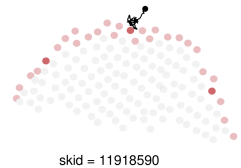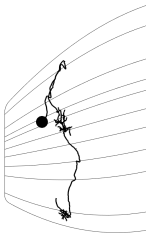



## DRA seed column Dm11 (1 cell)

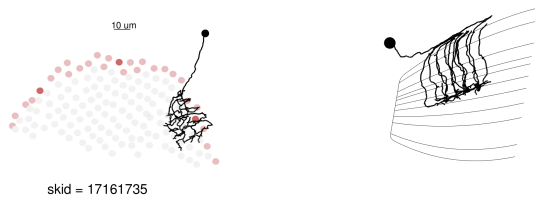

## DRA seed column aMe12 (1 cell)

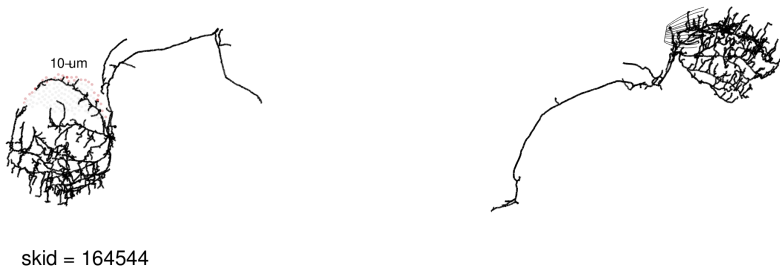

## DRA seed column TmY (1 cell)

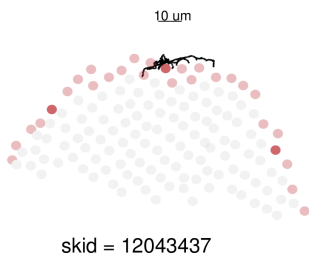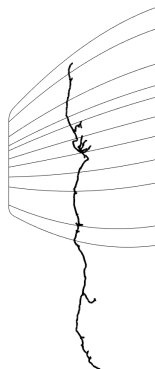

## DRA seed column ML-VPN2 (1 cell)

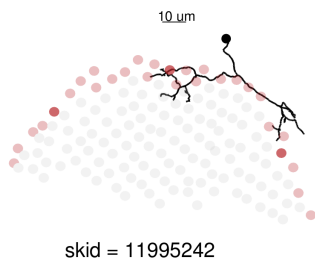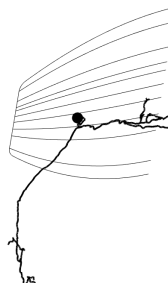

DRA seed column C2 (1 cell)

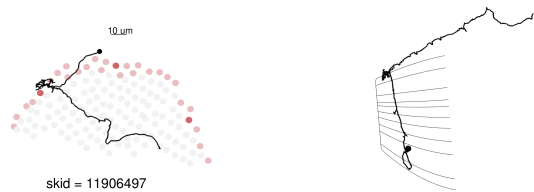

# DRA seed column Identified < 3 synapses (33 cells)

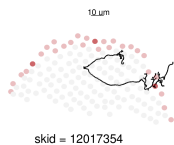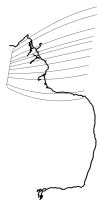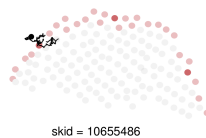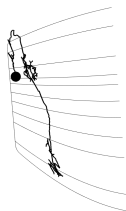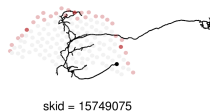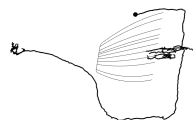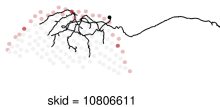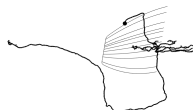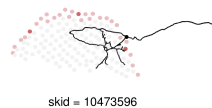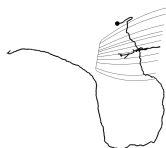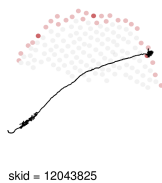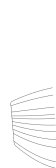

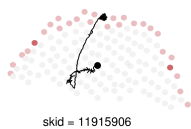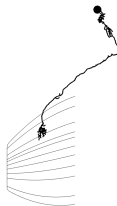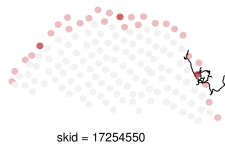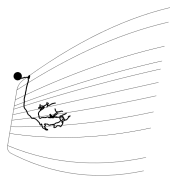

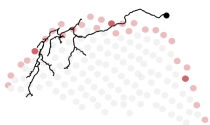

skid = 16110049

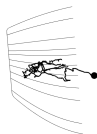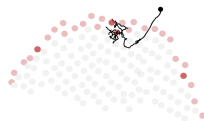

skid = 11993803

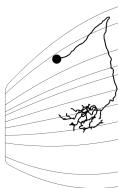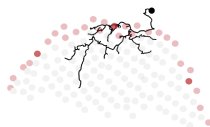

skid = 10479097

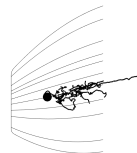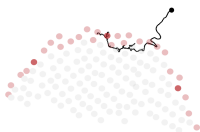

skid = 11981475

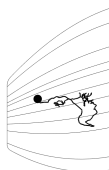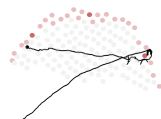

skid = 12044212

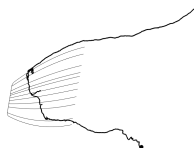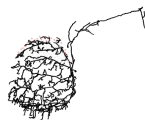

skid = 28841

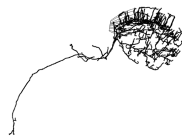

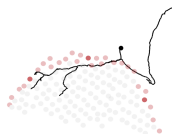

skid = 15997281

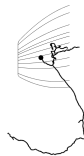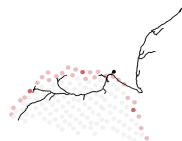

skid = 16215491

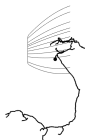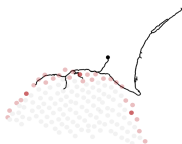

skid = 15984100

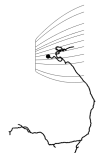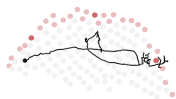

skid = 17252541

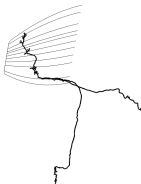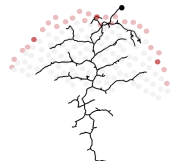

skid = 12109026

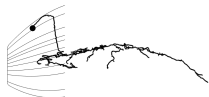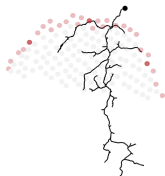

skid = 11993432

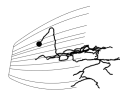

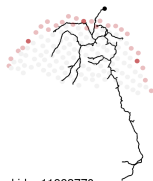

skid = 11992770

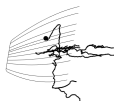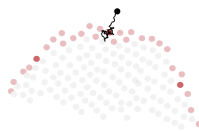

skid = 11947152

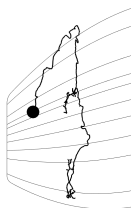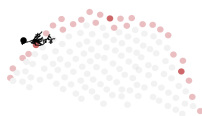

skid = 12045602

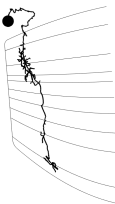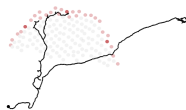

skid = 10820916

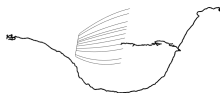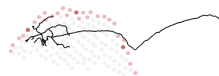

skid = 15978559

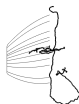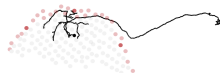

skid = 14726392

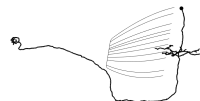



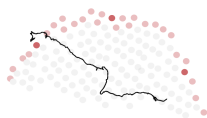

skid = 15970720

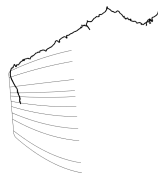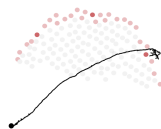

skid = 17253295

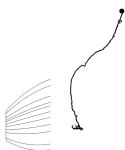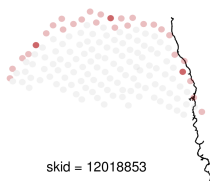

skid = 12018853

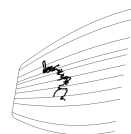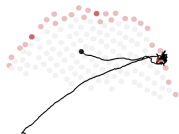

skid = 12002622

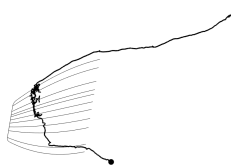

## DRA seed column Unidentified $\geq 3$ synapses (2 cells)

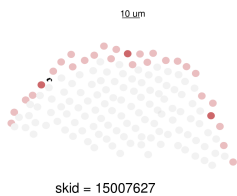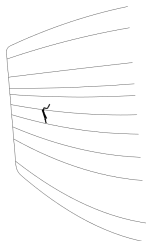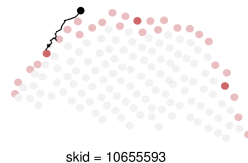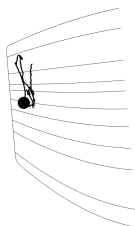

# DRA seed column Unidentified < 3 synapses (57 cells)

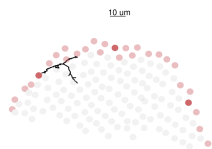

skid = 15767887

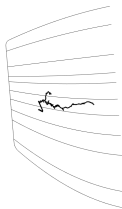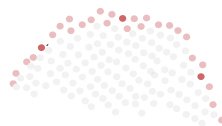

skid = 14867403

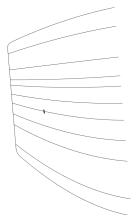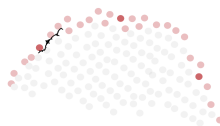

skid = 14788295

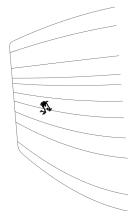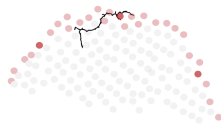

skid = 11994900

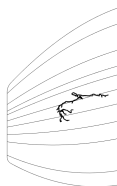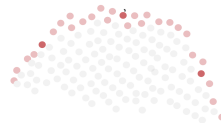

skid = 11947309

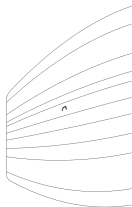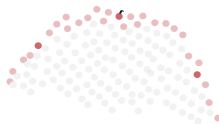

skid = 11918118

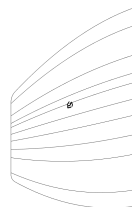

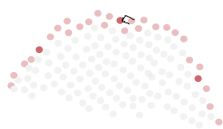

skid = 11918096

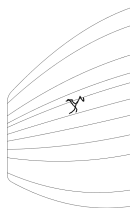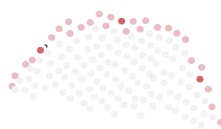

skid = 11904798

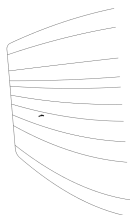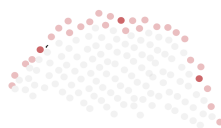

skid = 11903817

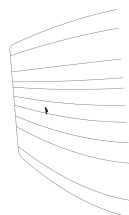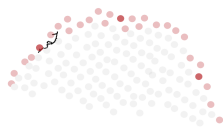

skid = 14991388

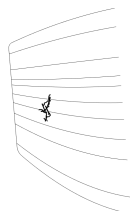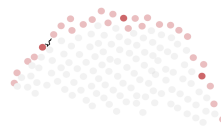

skid = 14798840

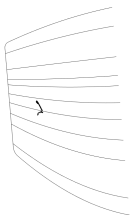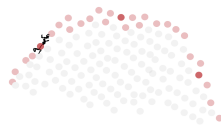

skid = 14315233

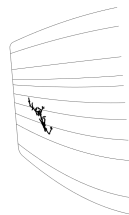

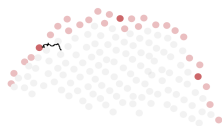

skid = 14081456

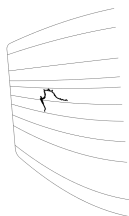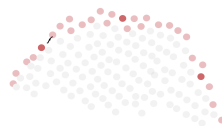

skid = 13938781

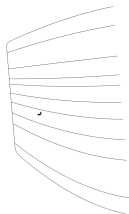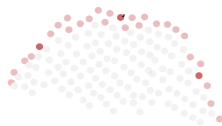

skid = 13433447

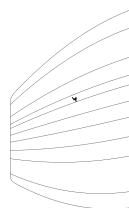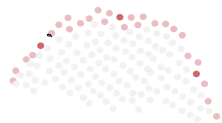

skid = 13179812

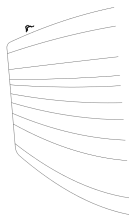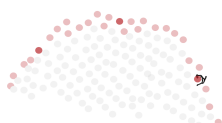

skid = 12019262

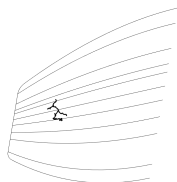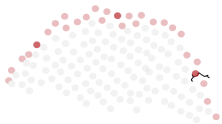

skid = 12019255

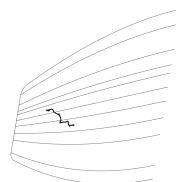

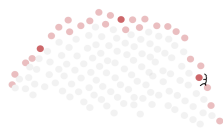

skid = 12018754

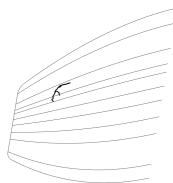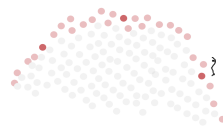

skid = 12017796

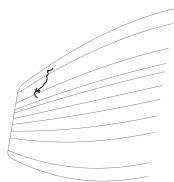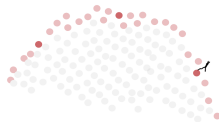

skid = 12017522

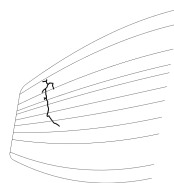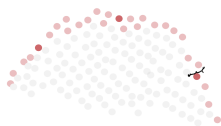

skid = 12017235

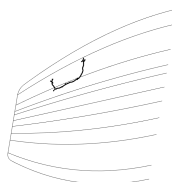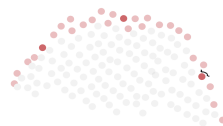

skid = 12017106

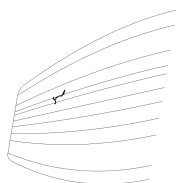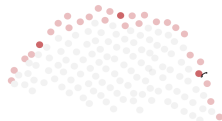

skid = 12016872

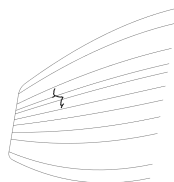

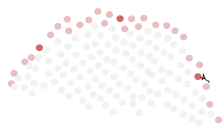

skid = 12016412

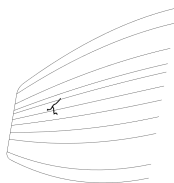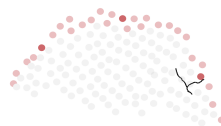

skid = 12015889

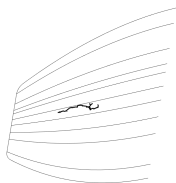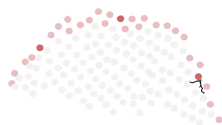

skid = 12015017

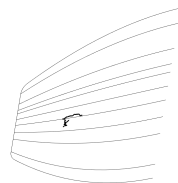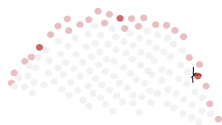

skid = 12014000

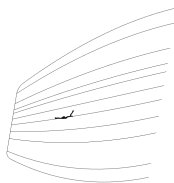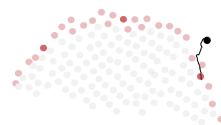

skid = 12013714

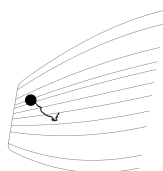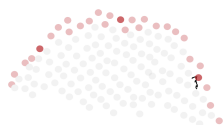

skid = 12002538

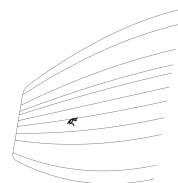

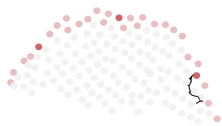

skid = 12002236

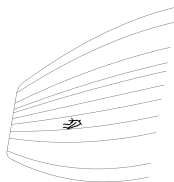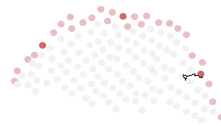

skid = 12002169

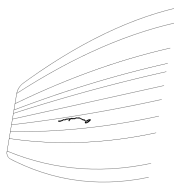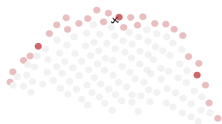

skid = 11995170

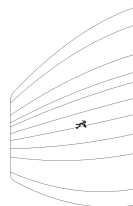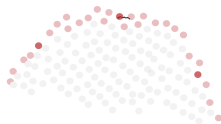

skid = 11995068

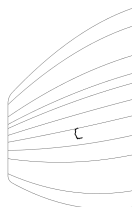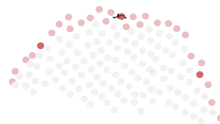

skid = 11995027

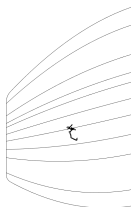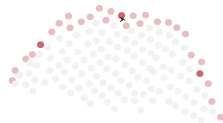

skid = 11994591

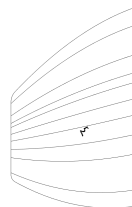



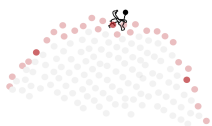

skid = 11994243

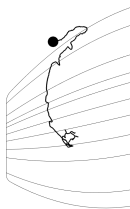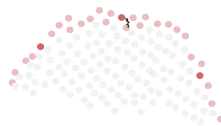

skid = 11993823

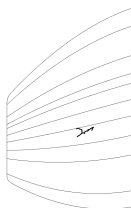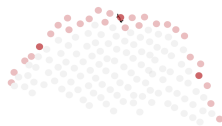

skid = 11992864

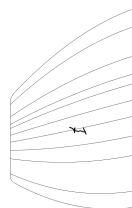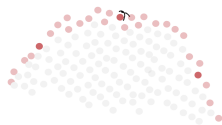

skid = 11981309

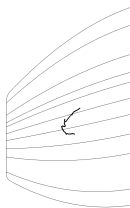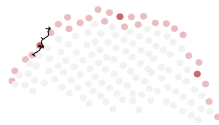

skid = 11908910

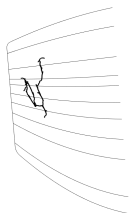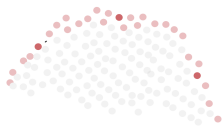

skid = 11908663

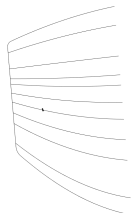

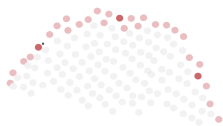

skid = 11904701

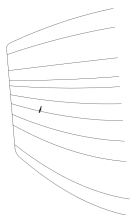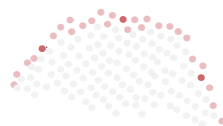

skid = 11904394

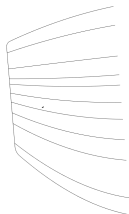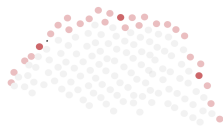

skid = 11904240

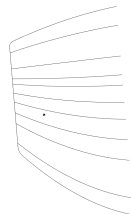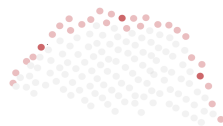

skid = 11904202

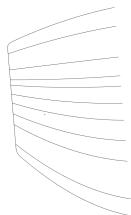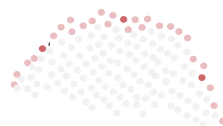

skid = 11904152

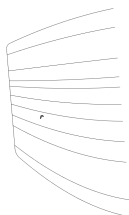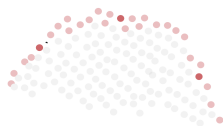

skid = 11904032

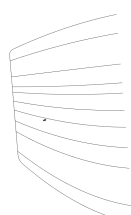

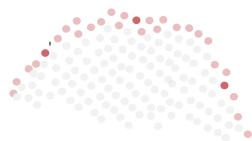

skid = 11902129

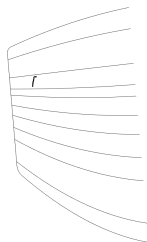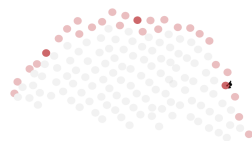

skid = 11829994

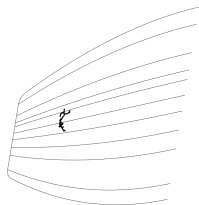

Supplement: supp [file elife-71858-supp-v2.zip]
