# Supplementary material for: Synaptic targets of photoreceptors specialized to detect color and skylight polarization in Drosophila
Source: eLife journal article supplement (doi:10.7554/elife.71858), 2021-12-16
Supplement: supp [file elife-71858-supp-v2.zip]

| Figure(s)       | Cross or Genotype                                                                                                                                                              | Additional information                                                                                 |
|-----------------|--------------------------------------------------------------------------------------------------------------------------------------------------------------------------------|--------------------------------------------------------------------------------------------------------|
| Figure1-Di      | pJFRC19-13XLexAop2-IVS-myr::GFP in su(Hw)attP8, pJFRC21-10XUAS-IVS-mCD8::RFP in attP18/w1118; R21B12-p65ADZp in attP40/Rh6-nlsLexAGADfl in attP40; R20E07-ZpGDBD in attP2/+    | Split-GAL4 is SS01015<br>anti-dsRed, anti-GFP<br>SlowFade mounting<br>40x objective                    |
| Figure1-Dii     | pJFRC19-13XLexAop2-IVS-myr::GFP in su(Hw)attP8, pJFRC21-10XUAS-IVS-mCD8::RFP in attP18/w1118; R21B12-p65ADZpattP40/Rh3-nlsLexAGADfl in attP40 in attP40; R20E07-ZpGDBD attP2/+ | Split-GAL4 is SS01015<br>anti-dsRed, anti-GFP<br>SlowFade mounting<br>40x objective                    |
| Figure2-Diii    | S003159 (VT043162-p65ADZp in attP40; R20E07-ZpGDBD in attP2) crossed to MCFO-1<br>MCFO stock names are as in Nern et al (2015) Table S2.)                                      | 63x objective<br>DPX mounting<br>anti-Brp (mAb Nc82) reference                                         |
| Figure3-Aii,Aiv | R41C05 crossed to MCFO-7                                                                                                                                                       | 63x objective<br>anti-Brp (mAb Nc82) reference<br>DPX mounting                                         |
| Figure3-Bii,Biv | VT014206 crossed to MCFO-7                                                                                                                                                     | 63x objective<br>anti-Brp (mAb Nc82) reference<br>DPX mounting                                         |
| Figure3-Ciii    | SS02425 (R26H07-p65ADZp in attP40; VT010253-ZpGDBD in attP2) crossed to MCFO-1                                                                                                 | 63x objective<br>anti-Brp (mAb Nc82) reference<br>DPX mounting                                         |
| Figure4-Dv      | SS02978(R42E06-p65ADZp in attP40; VT064564-ZpGdbd-ZpGDBD in attP2) crossed to MCFO-1                                                                                           | 63x objective<br>anti-Brp (mAb Nc82) reference<br>DPX mounting                                         |
| Figure4-Dvi     | SS02978 crossed to pJFRC51-3XUAS-IVS-Syt::smHA in su(Hw)attP1, pJFRC225-5XUAS-IVS-myr::smFLAG in VK00005                                                                       | 63x objective<br>anti-Brp (mAb Nc82) reference<br>DPX mounting                                         |
| Figure5-Ci,Cii  | SS28175 (R51E06-p65ADZp in attP40; R15D05-ZpGDBD in attP2) crossed to pJFRC51-3XUAS-IVS-Syt::smHA in su(Hw)attP1, pJFRC225-5XUAS-IVS-myr::smFLAG in VK00005                    | overlay of a registered image with the template used for registration<br>63x objective<br>DPX mounting |

|                             |                                                                                                                                                                                                                                                                                    |                                                                                                                                                              |
|-----------------------------|------------------------------------------------------------------------------------------------------------------------------------------------------------------------------------------------------------------------------------------------------------------------------------|--------------------------------------------------------------------------------------------------------------------------------------------------------------|
|                             |                                                                                                                                                                                                                                                                                    |                                                                                                                                                              |
| Figure5-Ciii                | SS28175 crossed to MCFO-1                                                                                                                                                                                                                                                          | overlay of a registered image with the template used for registration<br>63x objective<br>DPX mounting                                                       |
| Figure5-Civ                 | SS28175 crossed to MCFO-1                                                                                                                                                                                                                                                          | overlay of a registered image with the template used for registration (the MCFO labeled cells are from the same optic lobe)<br>63x objective<br>DPX mounting |
| Figure5-Cv                  | ML-VPN1: SS28175 crossed to MCFO-1 and L2 neuron terminals in the medulla:<br>SS00801 (R53G02-p65ADZp in attP40; R29G11-ZpGDBD in attP2) crossed to<br>pJFRC51-3XUAS-IVS-Syt::smHA in su(Hw)attP1, pJFRC225-5XUAS-IVS-myr::smFLAG in VK00005 (only synaptotagmin-HA pattern shown) | overlay of registered images showing a single ML-VPN1 cell and L2 terminals in the medulla<br><br>63x objectives<br>DPX mounting                             |
| Figure5-Cvi                 | pJFRC19-13XLexAop2-IVS-myr::GFP in su(Hw)attP8, pJFRC21-10XUAS-IVS-mCD8::RFP in attP18/w1118; R51E06-p65ADZpattP40/Rh6-nlsLexAGADfl in attP40; R15D05-ZpGDBD_attP2/+                                                                                                               | Split-GAL4 is S28175 anti-dsRed, anti-chaoptin (mAb 24B10), native GFP for Rh6 marker<br>40x objective<br>SlowFade mounting                                  |
| Figure5-figure supplement 1 | pJFRC19-13XLexAop2-IVS-myr::GFP in su(Hw)attP8, pJFRC21-10XUAS-IVS-mCD8::RFP in attP18/w1118; R51E06-p65ADZpattP40/Rh5-nlsLexAGADfl in attP40; R15D05-ZpGDBD_attP2/+                                                                                                               | Split-GAL4 is S28175 anti-dsRed, anti-chaoptin (mAb 24B10), native GFP for Rh5 marker<br>40x objective<br>SlowFade mounting                                  |
| Figure7-Aiv                 | ortC2b<br>-Gal4;ortC2b<br>-Gal4 crossed to MCFO-1                                                                                                                                                                                                                                  | 63x objective<br>VECTASHIELD mounting                                                                                                                        |
| Figure7-Civ                 | ortC2b<br>-Gal4;ortC2b<br>-Gal4 crossed to MCFO-1                                                                                                                                                                                                                                  | 63x objective<br>VECTASHIELD mounting                                                                                                                        |
| Figure8-Aii                 | R56F07 crossed to MCFO-1                                                                                                                                                                                                                                                           | anti-cadherin (mAb DN-Ex #8) reference<br>63x objective<br>VECTASHIELD mounting                                                                              |
| Figure8-Avi                 | R56F07 crossed to MCFO-1                                                                                                                                                                                                                                                           | Photoreceptor neurons labeled with anti-chaoptin (mAb 24B10) anti-cadherin (mAb DN-Ex #8)                                                                    |

|                             |                                                                                                                                  |                                                                                                                                     |
|-----------------------------|----------------------------------------------------------------------------------------------------------------------------------|-------------------------------------------------------------------------------------------------------------------------------------|
|                             |                                                                                                                                  | 63x objective<br>VECTASHIELD mounting                                                                                               |
| Figure8-Bii                 | OL0007B ((R35D04-p65ADZp in attP40; R65B05-ZpGDBD in attP2) crossed to MCFO-1<br><br>The image stack used is from Wu et al 2016. | 20x objective<br>anti-Brp (mAb Nc82) reference<br>DPX mounting                                                                      |
| Figure8-Bvi                 | OL0007B crossed to 20XUAS-CsChrimson-mVenus in attP18                                                                            | Photoreceptor neurons labeled with anti-chaoptin (mAb 24B10)<br>40x objective<br>SlowFade mounting                                  |
| Figure8-figure supplement 1 | 20XUAS-CsChrimson-mVenus in attP18/+; R24F06-p65ADZp in attP40/+; VT000770 -ZpGDBD in attP2/+                                    | Single image of this AD/DBD combination from split-GAL4 screening<br>anti-Brp (mAb Nc82) reference<br>20x objective<br>DPX mounting |
| Figure9 -Av                 | R70E04 crossed to MCFO-7                                                                                                         | anti-Brp (mAb Nc82) reference<br>20x objective<br>DPX mounting                                                                      |
| Figure9 -Av inset           | VT047171 crossed to MCFO-7                                                                                                       | anti-Brp (mAb Nc82) reference<br>63x objective<br>DPX mounting                                                                      |
| Figure9-Bv                  | R71A09 crossed to MCFO-7                                                                                                         | anti-Brp (mAb Nc82) reference<br>20x objective<br>DPX mounting                                                                      |
| Figure9-Cv                  | R72C08 crossed to MCFO-7                                                                                                         | anti-Brp (mAb Nc82) reference<br>20x objective<br>DPX mounting                                                                      |
