# Supplementary material for: Synaptic targets of photoreceptors specialized to detect color and skylight polarization in Drosophila
Source: eLife journal article supplement (doi:10.7554/elife.71858), 2021-12-16
Supplement: supp [file elife-71858-supp-v2.zip]

# Supplementary File 1: Tables of all seed column R7, R8, R7-DRA and R8-DRA target cells by type

## Contents

|                                        |   |
|----------------------------------------|---|
| R7 and R8 outgoing Dm9 . . . . .       | 3 |
| R7 and R8 outgoing Dm8 . . . . .       | 3 |
| R7 and R8 outgoing MeTu . . . . .      | 3 |
| R7 and R8 outgoing R7 . . . . .        | 4 |
| R7 and R8 outgoing Tm5c . . . . .      | 4 |
| R7 and R8 outgoing Tm20 . . . . .      | 4 |
| R7 and R8 outgoing Mi15 . . . . .      | 4 |
| R7 and R8 outgoing Mi4 . . . . .       | 4 |
| R7 and R8 outgoing ML1 . . . . .       | 5 |
| R7 and R8 outgoing Dm2 . . . . .       | 5 |
| R7 and R8 outgoing Dm11 . . . . .      | 5 |
| R7 and R8 outgoing L3 . . . . .        | 5 |
| R7 and R8 outgoing Mi1 . . . . .       | 5 |
| R7 and R8 outgoing R8 . . . . .        | 5 |
| R7 and R8 outgoing Tm5a . . . . .      | 6 |
| R7 and R8 outgoing Tm5b . . . . .      | 6 |
| R7 and R8 outgoing Tm . . . . .        | 6 |
| R7 and R8 outgoing Tm5b-like . . . . . | 6 |
| R7 and R8 outgoing Mi9 . . . . .       | 6 |
| R7 and R8 outgoing L1 . . . . .        | 7 |
| R7 and R8 outgoing aMe12 . . . . .     | 7 |
| R7 and R8 outgoing Dm . . . . .        | 7 |
| R7 and R8 outgoing ML-VPN1 . . . . .   | 7 |
| R7 and R8 outgoing C2 . . . . .        | 7 |
| R7 and R8 outgoing Mt-VPN . . . . .    | 7 |
| R7 and R8 outgoing Mti . . . . .       | 8 |
| R7 and R8 outgoing Tm5a-like . . . . . | 8 |
| R7 and R8 outgoing TmY10 . . . . .     | 8 |
| R7 and R8 outgoing Mi10 . . . . .      | 8 |

|                                                    |    |
|----------------------------------------------------|----|
| R7 and R8 outgoing Mi . . . . .                    | 8  |
| R7 and R8 outgoing C3 . . . . .                    | 8  |
| R7 and R8 outgoing Identified-<3 . . . . .         | 9  |
| R7 and R8 outgoing Unidentified->=3 . . . . .      | 9  |
| R7 and R8 outgoing Unidentified-<3 . . . . .       | 10 |
| R7 and R8 incoming Dm9 . . . . .                   | 11 |
| R7 and R8 incoming R8 . . . . .                    | 11 |
| R7 and R8 incoming R7 . . . . .                    | 11 |
| R7 and R8 incoming Mt-VPN . . . . .                | 11 |
| R7 and R8 incoming C2 . . . . .                    | 11 |
| R7 and R8 incoming L3 . . . . .                    | 11 |
| R7 and R8 incoming Identified-<3 . . . . .         | 12 |
| R7 and R8 incoming Unidentified-<3 . . . . .       | 12 |
| R7-DRA and R8-DRA outgoing Dm-DRA1 . . . . .       | 12 |
| R7-DRA and R8-DRA outgoing Dm9 . . . . .           | 13 |
| R7-DRA and R8-DRA outgoing MeTu-DRA . . . . .      | 13 |
| R7-DRA and R8-DRA outgoing R7-DRA . . . . .        | 13 |
| R7-DRA and R8-DRA outgoing Dm-DRA2 . . . . .       | 14 |
| R7-DRA and R8-DRA outgoing Dm2 . . . . .           | 14 |
| R7-DRA and R8-DRA outgoing R8-DRA . . . . .        | 14 |
| R7-DRA and R8-DRA outgoing Mi15 . . . . .          | 14 |
| R7-DRA and R8-DRA outgoing Mti-DRA-1 . . . . .     | 14 |
| R7-DRA and R8-DRA outgoing MeMe-DRA . . . . .      | 15 |
| R7-DRA and R8-DRA outgoing L3 . . . . .            | 15 |
| R7-DRA and R8-DRA outgoing VPN-DRA . . . . .       | 15 |
| R7-DRA and R8-DRA outgoing L1 . . . . .            | 15 |
| R7-DRA and R8-DRA outgoing Tm20 . . . . .          | 15 |
| R7-DRA and R8-DRA outgoing Mti-DRA-2 . . . . .     | 15 |
| R7-DRA and R8-DRA outgoing Mi1 . . . . .           | 16 |
| R7-DRA and R8-DRA outgoing MeTu . . . . .          | 16 |
| R7-DRA and R8-DRA outgoing Tm5-like . . . . .      | 16 |
| R7-DRA and R8-DRA outgoing Mi9 . . . . .           | 16 |
| R7-DRA and R8-DRA outgoing Dm11 . . . . .          | 16 |
| R7-DRA and R8-DRA outgoing aMe12 . . . . .         | 16 |
| R7-DRA and R8-DRA outgoing TmY . . . . .           | 16 |
| R7-DRA and R8-DRA outgoing ML-VPN2 . . . . .       | 17 |
| R7-DRA and R8-DRA outgoing C2 . . . . .            | 17 |
| R7-DRA and R8-DRA outgoing Identified-<3 . . . . . | 17 |

|                                                       |    |
|-------------------------------------------------------|----|
| R7-DRA and R8-DRA outgoing Unidentified->=3 . . . . . | 17 |
| R7-DRA and R8-DRA outgoing Unidentified-<3 . . . . .  | 18 |
| R7-DRA and R8-DRA incoming Dm9 . . . . .              | 19 |
| R7-DRA and R8-DRA incoming R8-DRA . . . . .           | 19 |
| R7-DRA and R8-DRA incoming R7-DRA . . . . .           | 19 |
| R7-DRA and R8-DRA incoming C2 . . . . .               | 19 |
| R7-DRA and R8-DRA incoming Mi15 . . . . .             | 19 |
| R7-DRA and R8-DRA incoming Identified-<3 . . . . .    | 19 |
| R7-DRA and R8-DRA incoming Unidentified-<3 . . . . .  | 20 |

## R7 and R8 outgoing Dm9

| name                     | skid     | pR7a | pR7b | yR7a | yR7b | pR8a | pR8b | yR8a | yR8b | total | %R7   | %R8  | %p    | %y    |
|--------------------------|----------|------|------|------|------|------|------|------|------|-------|-------|------|-------|-------|
| Putative Dm9 11452428 MF | 11452427 | 29   | 37   | 26   | 23   | 70   | 65   | 52   | 66   | 368   | 31.2  | 68.8 | 54.6  | 45.4  |
| Putative Dm9 11447062 CL | 11447061 | 16   | 0    | 11   | 0    | 0    | 0    | 12   | 0    | 39    | 69.2  | 30.8 | 41.0  | 59.0  |
| Putative Dm9 11450496 CL | 11450495 | 0    | 0    | 0    | 4    | 0    | 0    | 6    | 5    | 15    | 26.7  | 73.3 | 0.0   | 100.0 |
| Putative Dm9 11484680 MF | 11484679 | 8    | 0    | 0    | 0    | 0    | 0    | 0    | 0    | 8     | 100.0 | 0.0  | 100.0 | 0.0   |
| Putative Dm9 11444387 HL | 11444386 | 0    | 4    | 0    | 0    | 0    | 4    | 0    | 0    | 8     | 50.0  | 50.0 | 100.0 | 0.0   |
| Putative Dm9 11454715 CL | 11454714 | 0    | 0    | 0    | 2    | 0    | 3    | 0    | 2    | 7     | 28.6  | 71.4 | 42.9  | 57.1  |
| Total                    |          | 53   | 41   | 37   | 29   | 70   | 72   | 70   | 73   | 445   | 36.0  | 64.0 | 53.0  | 47.0  |

## R7 and R8 outgoing Dm8

| name                     | skid     | pR7a | pR7b | yR7a | yR7b | pR8a | pR8b | yR8a | yR8b | total | %R7 | %R8 | %p    | %y    |
|--------------------------|----------|------|------|------|------|------|------|------|------|-------|-----|-----|-------|-------|
| Putative Dm8 11453022 CL | 11453021 | 4    | 4    | 19   | 35   | 0    | 0    | 0    | 0    | 62    | 100 | 0   | 12.9  | 87.1  |
| Putative Dm8 10411812 MF | 10411811 | 21   | 40   | 0    | 0    | 0    | 0    | 0    | 0    | 61    | 100 | 0   | 100.0 | 0.0   |
| Putative Dm8 10208776 MF | 10208775 | 15   | 3    | 35   | 6    | 0    | 0    | 0    | 0    | 59    | 100 | 0   | 30.5  | 69.5  |
| Putative Dm8 11453312 CL | 11453311 | 9    | 17   | 8    | 15   | 0    | 0    | 0    | 0    | 49    | 100 | 0   | 53.1  | 46.9  |
| Putative Dm8 10109587 MF | 10109586 | 39   | 4    | 0    | 0    | 0    | 0    | 0    | 0    | 43    | 100 | 0   | 100.0 | 0.0   |
| Putative Dm8 11500072 HL | 11500071 | 1    | 17   | 0    | 0    | 0    | 0    | 0    | 0    | 18    | 100 | 0   | 100.0 | 0.0   |
| Putative Dm8 11448877 HL | 11523807 | 0    | 17   | 0    | 0    | 0    | 0    | 0    | 0    | 17    | 100 | 0   | 100.0 | 0.0   |
| Putative Dm8 10419715 MF | 10419714 | 14   | 0    | 0    | 2    | 0    | 0    | 0    | 0    | 16    | 100 | 0   | 87.5  | 12.5  |
| Putative Dm8 11447521 MF | 11447520 | 0    | 0    | 9    | 5    | 0    | 0    | 0    | 0    | 14    | 100 | 0   | 0.0   | 100.0 |
| Putative Dm8 10410433 MF | 10410432 | 10   | 3    | 0    | 0    | 0    | 0    | 0    | 0    | 13    | 100 | 0   | 100.0 | 0.0   |
| Putative Dm8 10196190 MF | 10196189 | 10   | 0    | 3    | 0    | 0    | 0    | 0    | 0    | 13    | 100 | 0   | 76.9  | 23.1  |
| Putative Dm8 10245572 MF | 10245571 | 0    | 0    | 2    | 9    | 0    | 0    | 0    | 0    | 11    | 100 | 0   | 0.0   | 100.0 |
| Putative Dm8 10971699 MF | 10971698 | 0    | 0    | 0    | 10   | 0    | 0    | 0    | 0    | 10    | 100 | 0   | 0.0   | 100.0 |
| Putative Dm8 11445682 MF | 11445681 | 7    | 0    | 0    | 0    | 0    | 0    | 0    | 0    | 7     | 100 | 0   | 100.0 | 0.0   |
| Putative Dm8 10995249 MF | 10995248 | 0    | 0    | 0    | 3    | 0    | 0    | 0    | 0    | 3     | 100 | 0   | 0.0   | 100.0 |
| Total                    |          | 130  | 105  | 76   | 85   | 0    | 0    | 0    | 0    | 396   | 100 | 0   | 59.3  | 40.7  |

## R7 and R8 outgoing MeTu

| name                      | skid     | pR7a | pR7b | yR7a | yR7b | pR8a | pR8b | yR8a | yR8b | total | %R7 | %R8 | %p   | %y    |
|---------------------------|----------|------|------|------|------|------|------|------|------|-------|-----|-----|------|-------|
| Putative MeTu 10409864 MF | 10409863 | 22   | 13   | 17   | 12   | 0    | 0    | 0    | 0    | 64    | 100 | 0   | 54.7 | 45.3  |
| Putative MeTu 11455123 CL | 11455122 | 0    | 21   | 4    | 14   | 0    | 0    | 0    | 0    | 39    | 100 | 0   | 53.8 | 46.2  |
| Putative MeTu 11455157 CL | 11455156 | 6    | 9    | 9    | 12   | 0    | 0    | 0    | 0    | 36    | 100 | 0   | 41.7 | 58.3  |
| Putative MeTu 10409693 MF | 10409692 | 11   | 0    | 6    | 0    | 0    | 0    | 0    | 0    | 17    | 100 | 0   | 64.7 | 35.3  |
| Putative MeTu 11448396 MF | 11448395 | 0    | 0    | 8    | 4    | 0    | 0    | 0    | 0    | 12    | 100 | 0   | 0.0  | 100.0 |
| Putative MeTu 11455113 CL | 11455112 | 0    | 0    | 0    | 4    | 0    | 0    | 0    | 0    | 4     | 100 | 0   | 0.0  | 100.0 |
| Putative MeTu 11499694 CL | 11499693 | 0    | 0    | 3    | 0    | 0    | 0    | 0    | 0    | 3     | 100 | 0   | 0.0  | 100.0 |
| Total                     |          | 39   | 43   | 47   | 46   | 0    | 0    | 0    | 0    | 175   | 100 | 0   | 46.9 | 53.1  |

## R7 and R8 outgoing R7

| name                           | skid     | pR7a | pR7b | yR7a | yR7b | pR8a | pR8b | yR8a | yR8b | total | %R7   | %R8   | %p    | %y    |
|--------------------------------|----------|------|------|------|------|------|------|------|------|-------|-------|-------|-------|-------|
| Putative R7 col G1 10585941 MF | 10585940 | 0    | 0    | 0    | 0    | 0    | 0    | 46   | 0    | 46    | 0.0   | 100.0 | 0.0   | 100.0 |
| Putative R7 col A1 10082583 MF | 10082582 | 0    | 0    | 0    | 0    | 39   | 0    | 0    | 0    | 39    | 0.0   | 100.0 | 100.0 | 0.0   |
| Putative R7 col I1 10538511 MF | 10538510 | 0    | 0    | 0    | 0    | 0    | 36   | 0    | 0    | 36    | 0.0   | 100.0 | 100.0 | 0.0   |
| Putative R7 col H1 10653594 MF | 10653593 | 0    | 0    | 0    | 0    | 0    | 0    | 0    | 36   | 36    | 0.0   | 100.0 | 0.0   | 100.0 |
| Putative R7 10653781 MF        | 10653780 | 0    | 0    | 0    | 3    | 0    | 0    | 0    | 0    | 3     | 100.0 | 0.0   | 0.0   | 100.0 |
| Total                          |          | 0    | 0    | 0    | 3    | 39   | 36   | 46   | 36   | 160   | 1.9   | 98.1  | 46.9  | 53.1  |

## R7 and R8 outgoing Tm5c

| name                      | skid     | pR7a | pR7b | yR7a | yR7b | pR8a | pR8b | yR8a | yR8b | total | %R7  | %R8  | %p    | %y    |
|---------------------------|----------|------|------|------|------|------|------|------|------|-------|------|------|-------|-------|
| Putative Tm5c 11450506 CL | 11450505 | 0    | 0    | 0    | 2    | 0    | 0    | 21   | 22   | 45    | 4.4  | 95.6 | 0.0   | 100.0 |
| Putative Tm5c 11470103 MF | 11470102 | 0    | 0    | 1    | 0    | 0    | 0    | 23   | 0    | 24    | 4.2  | 95.8 | 0.0   | 100.0 |
| Putative Tm5c 11449561 MF | 11449560 | 2    | 5    | 0    | 0    | 6    | 4    | 3    | 4    | 24    | 29.2 | 70.8 | 70.8  | 29.2  |
| Putative Tm5c 11574444 MF | 11574443 | 0    | 0    | 2    | 0    | 0    | 0    | 16   | 0    | 18    | 11.1 | 88.9 | 0.0   | 100.0 |
| Putative Tm5c 11473479 CL | 11473478 | 0    | 0    | 0    | 4    | 0    | 0    | 0    | 14   | 18    | 22.2 | 77.8 | 0.0   | 100.0 |
| Putative Tm5c 11485095 MF | 11485094 | 1    | 0    | 0    | 0    | 10   | 0    | 0    | 0    | 11    | 9.1  | 90.9 | 100.0 | 0.0   |
| Total                     |          | 3    | 5    | 3    | 6    | 16   | 4    | 63   | 40   | 140   | 12.1 | 87.9 | 20.0  | 80.0  |

## R7 and R8 outgoing Tm20

| name                             | skid     | pR7a | pR7b | yR7a | yR7b | pR8a | pR8b | yR8a | yR8b | total | %R7 | %R8  | %p    | %y    |
|----------------------------------|----------|------|------|------|------|------|------|------|------|-------|-----|------|-------|-------|
| Putative Tm20 col I1 11444393 HL | 11444392 | 0    | 2    | 0    | 0    | 0    | 35   | 0    | 0    | 37    | 5.4 | 94.6 | 100.0 | 0.0   |
| Putative Tm20 col H1 11450553 CL | 11450552 | 0    | 0    | 0    | 2    | 0    | 0    | 0    | 35   | 37    | 5.4 | 94.6 | 0.0   | 100.0 |
| Putative Tm20 col A1 10423775 MF | 10423774 | 3    | 0    | 0    | 0    | 32   | 0    | 0    | 0    | 35    | 8.6 | 91.4 | 100.0 | 0.0   |
| Putative Tm20 col G1 11473669 MF | 11473668 | 0    | 0    | 1    | 0    | 0    | 0    | 30   | 0    | 31    | 3.2 | 96.8 | 0.0   | 100.0 |
| Total                            |          | 3    | 2    | 1    | 2    | 32   | 35   | 30   | 35   | 140   | 5.7 | 94.3 | 51.4  | 48.6  |

## R7 and R8 outgoing Mi15

| name                      | skid     | pR7a | pR7b | yR7a | yR7b | pR8a | pR8b | yR8a | yR8b | total | %R7  | %R8  | %p    | %y    |
|---------------------------|----------|------|------|------|------|------|------|------|------|-------|------|------|-------|-------|
| Putative Mi15 11445262 MF | 11445261 | 5    | 0    | 2    | 0    | 13   | 0    | 22   | 0    | 42    | 16.7 | 83.3 | 42.9  | 57.1  |
| Putative Mi15 11450568 CL | 11450567 | 0    | 0    | 0    | 3    | 0    | 0    | 0    | 32   | 35    | 8.6  | 91.4 | 0.0   | 100.0 |
| Putative Mi15 11453819 CL | 11453818 | 0    | 0    | 2    | 0    | 0    | 0    | 25   | 2    | 29    | 6.9  | 93.1 | 0.0   | 100.0 |
| Putative Mi15 11484381 HL | 11484380 | 0    | 1    | 0    | 0    | 0    | 25   | 0    | 0    | 26    | 3.8  | 96.2 | 100.0 | 0.0   |
| Total                     |          | 5    | 1    | 4    | 3    | 13   | 25   | 47   | 34   | 132   | 9.8  | 90.2 | 33.3  | 66.7  |

## R7 and R8 outgoing Mi4

| name                            | skid     | pR7a | pR7b | yR7a | yR7b | pR8a | pR8b | yR8a | yR8b | total | %R7 | %R8 | %p  | %y  |
|---------------------------------|----------|------|------|------|------|------|------|------|------|-------|-----|-----|-----|-----|
| Putative Mi4 col G1 11481479 MF | 11481478 | 0    | 0    | 0    | 0    | 0    | 0    | 30   | 0    | 30    | 0   | 100 | 0   | 100 |
| Putative Mi4 col I1 11467500 HL | 11467499 | 0    | 0    | 0    | 0    | 0    | 29   | 0    | 0    | 29    | 0   | 100 | 100 | 0   |
| Putative Mi4 col A1 11465885 CL | 11465884 | 0    | 0    | 0    | 0    | 29   | 0    | 0    | 0    | 29    | 0   | 100 | 100 | 0   |
| Putative Mi4 col H1 11473654 CL | 11473653 | 0    | 0    | 0    | 0    | 0    | 0    | 0    | 28   | 28    | 0   | 100 | 0   | 100 |
| Total                           |          | 0    | 0    | 0    | 0    | 29   | 29   | 30   | 28   | 116   | 0   | 100 | 50  | 50  |

## R7 and R8 outgoing ML1

| name                     | skid     | pR7a | pR7b | yR7a | yR7b | pR8a | pR8b | yR8a | yR8b | total | %R7 | %R8 | %p    | %y   |
|--------------------------|----------|------|------|------|------|------|------|------|------|-------|-----|-----|-------|------|
| Putative ML1 11472158 CL | 11472157 | 0    | 0    | 0    | 0    | 11   | 4    | 13   | 13   | 41    | 0   | 100 | 36.6  | 63.4 |
| Putative ML1 11458491 CL | 11458490 | 0    | 0    | 0    | 0    | 13   | 12   | 4    | 0    | 29    | 0   | 100 | 86.2  | 13.8 |
| Putative ML1 11471220 CL | 11471219 | 0    | 0    | 0    | 0    | 0    | 13   | 4    | 7    | 24    | 0   | 100 | 54.2  | 45.8 |
| Putative ML1 11458827 CL | 11458826 | 0    | 0    | 0    | 0    | 5    | 0    | 0    | 0    | 5     | 0   | 100 | 100.0 | 0.0  |
| Total                    |          | 0    | 0    | 0    | 0    | 29   | 29   | 21   | 20   | 99    | 0   | 100 | 58.6  | 41.4 |

## R7 and R8 outgoing Dm2

| name                     | skid     | pR7a | pR7b | yR7a | yR7b | pR8a | pR8b | yR8a | yR8b | total | %R7  | %R8   | %p    | %y    |
|--------------------------|----------|------|------|------|------|------|------|------|------|-------|------|-------|-------|-------|
| Putative Dm2 11448823 HL | 11448822 | 0    | 12   | 0    | 0    | 0    | 24   | 0    | 0    | 36    | 33.3 | 66.7  | 100.0 | 0.0   |
| Putative Dm2 10499250 MF | 10499249 | 6    | 0    | 0    | 0    | 29   | 0    | 0    | 0    | 35    | 17.1 | 82.9  | 100.0 | 0.0   |
| Putative Dm2 11453278 CL | 11453277 | 0    | 0    | 0    | 3    | 0    | 0    | 0    | 15   | 18    | 16.7 | 83.3  | 0.0   | 100.0 |
| Putative Dm2 11466217 CL | 11466216 | 0    | 0    | 0    | 0    | 7    | 0    | 0    | 0    | 7     | 0.0  | 100.0 | 100.0 | 0.0   |
| Total                    |          | 6    | 12   | 0    | 3    | 36   | 24   | 0    | 15   | 96    | 21.9 | 78.1  | 81.2  | 18.8  |

## R7 and R8 outgoing Dm11

| name                      | skid     | pR7a | pR7b | yR7a | yR7b | pR8a | pR8b | yR8a | yR8b | total | %R7  | %R8  | %p    | %y   |
|---------------------------|----------|------|------|------|------|------|------|------|------|-------|------|------|-------|------|
| Putative Dm11 11450454 CL | 11450453 | 15   | 4    | 9    | 18   | 2    | 0    | 3    | 1    | 52    | 88.5 | 11.5 | 40.4  | 59.6 |
| Putative Dm11 11444399 HL | 11444398 | 0    | 9    | 0    | 0    | 0    | 2    | 0    | 0    | 11    | 81.8 | 18.2 | 100.0 | 0.0  |
| Total                     |          | 15   | 13   | 9    | 18   | 2    | 2    | 3    | 1    | 63    | 87.3 | 12.7 | 50.8  | 49.2 |

## R7 and R8 outgoing L3

| name                           | skid     | pR7a | pR7b | yR7a | yR7b | pR8a | pR8b | yR8a | yR8b | total | %R7  | %R8  | %p    | %y    |
|--------------------------------|----------|------|------|------|------|------|------|------|------|-------|------|------|-------|-------|
| Putative L3 col H1 11450470 CL | 11450469 | 0    | 0    | 0    | 12   | 0    | 0    | 0    | 7    | 19    | 63.2 | 36.8 | 0.0   | 100.0 |
| Putative L3 col A1 11445252 MF | 11445251 | 10   | 0    | 0    | 0    | 6    | 0    | 0    | 0    | 16    | 62.5 | 37.5 | 100.0 | 0.0   |
| Putative L3 col I1 11448597 HL | 11448596 | 0    | 9    | 0    | 0    | 0    | 6    | 0    | 0    | 15    | 60.0 | 40.0 | 100.0 | 0.0   |
| Putative L3 col G1 11453914 CL | 11453913 | 0    | 0    | 5    | 0    | 0    | 0    | 6    | 0    | 11    | 45.5 | 54.5 | 0.0   | 100.0 |
| Total                          |          | 10   | 9    | 5    | 12   | 6    | 6    | 6    | 7    | 61    | 59.0 | 41.0 | 50.8  | 49.2  |

## R7 and R8 outgoing Mi1

| name                            | skid     | pR7a | pR7b | yR7a | yR7b | pR8a | pR8b | yR8a | yR8b | total | %R7 | %R8 | %p    | %y    |
|---------------------------------|----------|------|------|------|------|------|------|------|------|-------|-----|-----|-------|-------|
| Putative Mi1 col I1 11471702 HL | 11471701 | 0    | 0    | 0    | 0    | 0    | 17   | 0    | 0    | 17    | 0   | 100 | 100.0 | 0.0   |
| Putative Mi1 col H1 11472781 CL | 11472780 | 0    | 0    | 0    | 0    | 0    | 0    | 0    | 14   | 14    | 0   | 100 | 0.0   | 100.0 |
| Putative Mi1 col G1 11470015 MF | 11470014 | 0    | 0    | 0    | 0    | 0    | 0    | 14   | 0    | 14    | 0   | 100 | 0.0   | 100.0 |
| Putative Mi1 col A1 11458128 CL | 11458127 | 0    | 0    | 0    | 0    | 14   | 0    | 0    | 0    | 14    | 0   | 100 | 100.0 | 0.0   |
| Total                           |          | 0    | 0    | 0    | 0    | 14   | 17   | 14   | 14   | 59    | 0   | 100 | 52.5  | 47.5  |

## R7 and R8 outgoing R8

| name                           | skid     | pR7a | pR7b | yR7a | yR7b | pR8a | pR8b | yR8a | yR8b | total | %R7   | %R8 | %p    | %y    |
|--------------------------------|----------|------|------|------|------|------|------|------|------|-------|-------|-----|-------|-------|
| Putative R8 col A1 10086692 MF | 10086691 | 20   | 0    | 0    | 0    | 1    | 0    | 0    | 0    | 21    | 95.2  | 4.8 | 100.0 | 0.0   |
| Putative R8 col H1 11468319 CL | 11468318 | 0    | 0    | 0    | 19   | 0    | 0    | 0    | 0    | 19    | 100.0 | 0.0 | 0.0   | 100.0 |
| Putative R8 col I1 11466409 HL | 11466408 | 0    | 11   | 0    | 0    | 0    | 0    | 0    | 0    | 11    | 100.0 | 0.0 | 100.0 | 0.0   |
| Putative R8 col G1 10629255 MF | 10629254 | 0    | 0    | 7    | 0    | 0    | 0    | 0    | 0    | 7     | 100.0 | 0.0 | 0.0   | 100.0 |
| Total                          |          | 20   | 11   | 7    | 19   | 1    | 0    | 0    | 0    | 58    | 98.3  | 1.7 | 55.2  | 44.8  |

## R7 and R8 outgoing Tm5a

| name                      | skid     | pR7a | pR7b | yR7a | yR7b | pR8a | pR8b | yR8a | yR8b | total | %R7 | %R8 | %p | %y  |
|---------------------------|----------|------|------|------|------|------|------|------|------|-------|-----|-----|----|-----|
| Putative Tm5a 11447184 MF | 11447183 | 0    | 0    | 29   | 0    | 0    | 0    | 0    | 0    | 29    | 100 | 0   | 0  | 100 |
| Putative Tm5a 11453107 CL | 11453106 | 0    | 0    | 0    | 24   | 0    | 0    | 0    | 0    | 24    | 100 | 0   | 0  | 100 |
| Total                     |          | 0    | 0    | 29   | 24   | 0    | 0    | 0    | 0    | 53    | 100 | 0   | 0  | 100 |

## R7 and R8 outgoing Tm5b

| name                      | skid     | pR7a | pR7b | yR7a | yR7b | pR8a | pR8b | yR8a | yR8b | total | %R7  | %R8  | %p    | %y   |
|---------------------------|----------|------|------|------|------|------|------|------|------|-------|------|------|-------|------|
| Putative Tm5b 11448828 HL | 11448827 | 0    | 19   | 0    | 0    | 0    | 1    | 0    | 6    | 26    | 73.1 | 26.9 | 76.9  | 23.1 |
| Putative Tm5b 10356413 MF | 10356412 | 20   | 0    | 0    | 0    | 2    | 0    | 0    | 0    | 22    | 90.9 | 9.1  | 100.0 | 0.0  |
| Total                     |          | 20   | 19   | 0    | 0    | 2    | 1    | 0    | 6    | 48    | 81.2 | 18.8 | 87.5  | 12.5 |

## R7 and R8 outgoing Tm

| name                    | skid     | pR7a | pR7b | yR7a | yR7b | pR8a | pR8b | yR8a | yR8b | total | %R7   | %R8   | %p    | %y    |
|-------------------------|----------|------|------|------|------|------|------|------|------|-------|-------|-------|-------|-------|
| Putative Tm 11544671 HL | 11544670 | 0    | 10   | 0    | 0    | 0    | 0    | 0    | 0    | 10    | 100.0 | 0.0   | 100.0 | 0.0   |
| Putative Tm 11671250 MF | 11671249 | 0    | 0    | 0    | 0    | 0    | 0    | 0    | 7    | 7     | 0.0   | 100.0 | 0.0   | 100.0 |
| Putative Tm 10692408 HL | 10692407 | 0    | 0    | 0    | 0    | 0    | 0    | 3    | 2    | 5     | 0.0   | 100.0 | 0.0   | 100.0 |
| Putative Tm 11474296 CL | 11474295 | 0    | 0    | 0    | 0    | 0    | 0    | 0    | 4    | 4     | 0.0   | 100.0 | 0.0   | 100.0 |
| Putative Tm 11458217 CL | 11458216 | 0    | 0    | 0    | 0    | 4    | 0    | 0    | 0    | 4     | 0.0   | 100.0 | 100.0 | 0.0   |
| Putative Tm 11455044 MF | 11455043 | 0    | 0    | 0    | 4    | 0    | 0    | 0    | 0    | 4     | 100.0 | 0.0   | 0.0   | 100.0 |
| Putative Tm 11445921 MF | 11445920 | 3    | 0    | 0    | 0    | 1    | 0    | 0    | 0    | 4     | 75.0  | 25.0  | 100.0 | 0.0   |
| Putative Tm 11459161 CL | 11459160 | 1    | 0    | 0    | 0    | 2    | 0    | 0    | 0    | 3     | 33.3  | 66.7  | 100.0 | 0.0   |
| Putative Tm 11450248 HL | 11450247 | 0    | 3    | 0    | 0    | 0    | 0    | 0    | 0    | 3     | 100.0 | 0.0   | 100.0 | 0.0   |
| Total                   |          | 4    | 13   | 0    | 4    | 7    | 0    | 3    | 13   | 44    | 47.7  | 52.3  | 54.5  | 45.5  |

## R7 and R8 outgoing Tm5b-like

| name                           | skid     | pR7a | pR7b | yR7a | yR7b | pR8a | pR8b | yR8a | yR8b | total | %R7  | %R8  | %p | %y  |
|--------------------------------|----------|------|------|------|------|------|------|------|------|-------|------|------|----|-----|
| Putative Tm5b-like 11447921 MF | 11447920 | 0    | 0    | 7    | 0    | 0    | 0    | 16   | 0    | 23    | 30.4 | 69.6 | 0  | 100 |
| Putative Tm5b-like 11447511 CL | 11447510 | 0    | 0    | 4    | 0    | 0    | 0    | 7    | 0    | 11    | 36.4 | 63.6 | 0  | 100 |
| Putative Tm5b-like 11468647 CL | 11468646 | 0    | 0    | 2    | 1    | 0    | 0    | 0    | 4    | 7     | 42.9 | 57.1 | 0  | 100 |
| Total                          |          | 0    | 0    | 13   | 1    | 0    | 0    | 23   | 4    | 41    | 34.1 | 65.9 | 0  | 100 |

## R7 and R8 outgoing Mi9

| name                            | skid     | pR7a | pR7b | yR7a | yR7b | pR8a | pR8b | yR8a | yR8b | total | %R7   | %R8   | %p    | %y    |
|---------------------------------|----------|------|------|------|------|------|------|------|------|-------|-------|-------|-------|-------|
| Putative Mi9 col A1 10422285 MF | 10422284 | 3    | 0    | 0    | 0    | 12   | 0    | 0    | 0    | 15    | 20.0  | 80.0  | 100.0 | 0.0   |
| Putative Mi9 col I1 11467629 HL | 11467628 | 0    | 0    | 0    | 0    | 0    | 14   | 0    | 0    | 14    | 0.0   | 100.0 | 100.0 | 0.0   |
| Putative Mi9 col G1 11447431 CL | 11447430 | 0    | 0    | 5    | 0    | 0    | 0    | 1    | 0    | 6     | 83.3  | 16.7  | 0.0   | 100.0 |
| Putative Mi9 col H1 11453112 CL | 11453111 | 0    | 0    | 0    | 4    | 0    | 0    | 0    | 0    | 4     | 100.0 | 0.0   | 0.0   | 100.0 |
| Total                           |          | 3    | 0    | 5    | 4    | 12   | 14   | 1    | 0    | 39    | 30.8  | 69.2  | 74.4  | 25.6  |

## R7 and R8 outgoing L1

| name                           | skid     | pR7a | pR7b | yR7a | yR7b | pR8a | pR8b | yR8a | yR8b | total | %R7  | %R8   | %p    | %y    |
|--------------------------------|----------|------|------|------|------|------|------|------|------|-------|------|-------|-------|-------|
| Putative L1 col I1 11472941 HL | 11472940 | 0    | 0    | 0    | 0    | 0    | 13   | 0    | 0    | 13    | 0.0  | 100.0 | 100.0 | 0.0   |
| Putative L1 col A1 10108986 MF | 10108985 | 2    | 0    | 0    | 0    | 8    | 0    | 0    | 0    | 10    | 20.0 | 80.0  | 100.0 | 0.0   |
| Putative L1 col H1 11472771 CL | 11472770 | 0    | 0    | 0    | 1    | 0    | 0    | 0    | 8    | 9     | 11.1 | 88.9  | 0.0   | 100.0 |
| Putative L1 col G1 11470179 MF | 11470178 | 0    | 0    | 0    | 0    | 0    | 0    | 6    | 0    | 6     | 0.0  | 100.0 | 0.0   | 100.0 |
| Total                          |          | 2    | 0    | 0    | 1    | 8    | 13   | 6    | 8    | 38    | 7.9  | 92.1  | 60.5  | 39.5  |

## R7 and R8 outgoing aMe12

| name                                                          | skid    | pR7a | pR7b | yR7a | yR7b | pR8a | pR8b | yR8a | yR8b | total | %R7  | %R8  | %p  | %y |
|---------------------------------------------------------------|---------|------|------|------|------|------|------|------|------|-------|------|------|-----|----|
| Putative aMe12 VPN ME.R to vACA OLCT bilateral 7038036 JS ECM | 7038035 | 2    | 0    | 0    | 0    | 15   | 0    | 0    | 0    | 17    | 11.8 | 88.2 | 100 | 0  |
| Putative aMe12 VPN ME.R to vACA OLCT bilateral 28842 AA GA    | 28841   | 1    | 1    | 0    | 0    | 0    | 11   | 0    | 0    | 13    | 15.4 | 84.6 | 100 | 0  |
| Total                                                         |         | 3    | 1    | 0    | 0    | 15   | 11   | 0    | 0    | 30    | 13.3 | 86.7 | 100 | 0  |

## R7 and R8 outgoing Dm

| name                    | skid     | pR7a | pR7b | yR7a | yR7b | pR8a | pR8b | yR8a | yR8b | total | %R7   | %R8  | %p    | %y    |
|-------------------------|----------|------|------|------|------|------|------|------|------|-------|-------|------|-------|-------|
| Putative Dm 11511058 MF | 11511057 | 0    | 4    | 0    | 0    | 0    | 4    | 0    | 0    | 8     | 50.0  | 50.0 | 100.0 | 0.0   |
| Putative Dm 11448963 MF | 11448962 | 2    | 4    | 0    | 0    | 0    | 2    | 0    | 0    | 8     | 75.0  | 25.0 | 100.0 | 0.0   |
| Putative Dm 11474157 CL | 11474156 | 0    | 0    | 0    | 1    | 0    | 0    | 0    | 5    | 6     | 16.7  | 83.3 | 0.0   | 100.0 |
| Putative Dm 10106711 MF | 10106710 | 1    | 0    | 3    | 0    | 0    | 0    | 0    | 0    | 4     | 100.0 | 0.0  | 25.0  | 75.0  |
| Putative Dm 11455002 MF | 11455001 | 0    | 0    | 0    | 3    | 0    | 0    | 0    | 3    | 3     | 100.0 | 0.0  | 0.0   | 100.0 |
| Total                   |          | 3    | 8    | 3    | 4    | 0    | 6    | 0    | 5    | 29    | 62.1  | 37.9 | 58.6  | 41.4  |

## R7 and R8 outgoing ML-VPN1

| name                         | skid     | pR7a | pR7b | yR7a | yR7b | pR8a | pR8b | yR8a | yR8b | total | %R7 | %R8 | %p    | %y  |
|------------------------------|----------|------|------|------|------|------|------|------|------|-------|-----|-----|-------|-----|
| Putative ML_VPN1 11458373 CL | 11458372 | 0    | 0    | 0    | 0    | 14   | 0    | 0    | 1    | 15    | 0   | 100 | 93.3  | 6.7 |
| Putative ML_VPN1 11467871 HL | 11467870 | 0    | 0    | 0    | 0    | 0    | 7    | 0    | 0    | 7     | 0   | 100 | 100.0 | 0.0 |
| Putative ML_VPN1 11466212 CL | 11466211 | 0    | 0    | 0    | 0    | 5    | 0    | 0    | 0    | 5     | 0   | 100 | 100.0 | 0.0 |
| Total                        |          | 0    | 0    | 0    | 0    | 19   | 7    | 0    | 1    | 27    | 0   | 100 | 96.3  | 3.7 |

## R7 and R8 outgoing C2

| name                    | skid     | pR7a | pR7b | yR7a | yR7b | pR8a | pR8b | yR8a | yR8b | total | %R7   | %R8  | %p    | %y   |
|-------------------------|----------|------|------|------|------|------|------|------|------|-------|-------|------|-------|------|
| Putative C2 11453788 CL | 11453787 | 0    | 6    | 9    | 4    | 0    | 0    | 0    | 0    | 19    | 100.0 | 0.0  | 31.6  | 68.4 |
| Putative C2 11456777 CL | 11456776 | 1    | 0    | 0    | 0    | 6    | 0    | 0    | 0    | 7     | 14.3  | 85.7 | 100.0 | 0.0  |
| Total                   |          | 1    | 6    | 9    | 4    | 6    | 0    | 0    | 0    | 26    | 76.9  | 23.1 | 50.0  | 50.0 |

## R7 and R8 outgoing Mt-VPN

| name                                  | skid     | pR7a | pR7b | yR7a | yR7b | pR8a | pR8b | yR8a | yR8b | total | %R7   | %R8   | %p  | %y  |
|---------------------------------------|----------|------|------|------|------|------|------|------|------|-------|-------|-------|-----|-----|
| Putative Mt_VPN 11453465 CL           | 11453464 | 0    | 0    | 5    | 6    | 0    | 0    | 0    | 0    | 11    | 100.0 | 0.0   | 0   | 100 |
| Putative Mt_VPN 11469482 HL           | 11469481 | 0    | 0    | 0    | 0    | 0    | 0    | 4    | 1    | 5     | 0.0   | 100.0 | 0   | 100 |
| Putative Mt_VPN 3401517 MR            | 14286406 | 0    | 0    | 1    | 0    | 0    | 0    | 3    | 0    | 4     | 25.0  | 75.0  | 0   | 100 |
| Putative Mt_VPN LP neuron 3509521 CPM | 3509520  | 0    | 0    | 0    | 0    | 0    | 3    | 0    | 0    | 3     | 0.0   | 100.0 | 100 | 0   |
| Total                                 |          | 0    | 0    | 6    | 6    | 0    | 3    | 7    | 1    | 23    | 52.2  | 47.8  | 13  | 87  |

## R7 and R8 outgoing Mti

| name                     | skid     | pR7a | pR7b | yR7a | yR7b | pR8a | pR8b | yR8a | yR8b | total | %R7  | %R8   | %p    | %y    |
|--------------------------|----------|------|------|------|------|------|------|------|------|-------|------|-------|-------|-------|
| Putative Mti 10289206 MF | 11666155 | 0    | 2    | 0    | 0    | 2    | 5    | 0    | 0    | 9     | 22.2 | 77.8  | 100.0 | 0.0   |
| Putative Mti 11481396 CL | 11481395 | 0    | 0    | 0    | 0    | 0    | 0    | 7    | 0    | 7     | 0.0  | 100.0 | 0.0   | 100.0 |
| Putative Mti 11466227 CL | 11466226 | 0    | 0    | 0    | 0    | 3    | 0    | 0    | 0    | 3     | 0.0  | 100.0 | 100.0 | 0.0   |
| Total                    |          | 0    | 2    | 0    | 0    | 5    | 5    | 7    | 0    | 19    | 10.5 | 89.5  | 63.2  | 36.8  |

## R7 and R8 outgoing Tm5a-like

| name                           | skid     | pR7a | pR7b | yR7a | yR7b | pR8a | pR8b | yR8a | yR8b | total | %R7 | %R8  | %p | %y  |
|--------------------------------|----------|------|------|------|------|------|------|------|------|-------|-----|------|----|-----|
| Putative Tm5a-like 11481725 MF | 11481724 | 0    | 0    | 1    | 0    | 0    | 0    | 16   | 0    | 17    | 5.9 | 94.1 | 0  | 100 |
| Total                          |          | 0    | 0    | 1    | 0    | 0    | 0    | 16   | 0    | 17    | 5.9 | 94.1 | 0  | 100 |

## R7 and R8 outgoing TmY10

| name                       | skid     | pR7a | pR7b | yR7a | yR7b | pR8a | pR8b | yR8a | yR8b | total | %R7  | %R8  | %p  | %y |
|----------------------------|----------|------|------|------|------|------|------|------|------|-------|------|------|-----|----|
| Putative TmY10 11449412 HL | 11449411 | 0    | 1    | 0    | 0    | 0    | 6    | 0    | 0    | 7     | 14.3 | 85.7 | 100 | 0  |
| Total                      |          | 0    | 1    | 0    | 0    | 0    | 6    | 0    | 0    | 7     | 14.3 | 85.7 | 100 | 0  |

## R7 and R8 outgoing Mi10

| name                      | skid     | pR7a | pR7b | yR7a | yR7b | pR8a | pR8b | yR8a | yR8b | total | %R7 | %R8 | %p | %y  |
|---------------------------|----------|------|------|------|------|------|------|------|------|-------|-----|-----|----|-----|
| Putative Mi10 11481717 MF | 11481716 | 0    | 0    | 0    | 0    | 0    | 0    | 5    | 0    | 5     | 0   | 100 | 0  | 100 |
| Total                     |          | 0    | 0    | 0    | 0    | 0    | 0    | 5    | 0    | 5     | 0   | 100 | 0  | 100 |

## R7 and R8 outgoing Mi

| name                    | skid     | pR7a | pR7b | yR7a | yR7b | pR8a | pR8b | yR8a | yR8b | total | %R7 | %R8 | %p   | %y   |
|-------------------------|----------|------|------|------|------|------|------|------|------|-------|-----|-----|------|------|
| Putative Mi 11453950 HL | 11453949 | 0    | 2    | 0    | 1    | 0    | 0    | 0    | 0    | 3     | 100 | 0   | 66.7 | 33.3 |
| Total                   |          | 0    | 2    | 0    | 1    | 0    | 0    | 0    | 0    | 3     | 100 | 0   | 66.7 | 33.3 |

## R7 and R8 outgoing C3

| name                    | skid     | pR7a | pR7b | yR7a | yR7b | pR8a | pR8b | yR8a | yR8b | total | %R7 | %R8 | %p | %y  |
|-------------------------|----------|------|------|------|------|------|------|------|------|-------|-----|-----|----|-----|
| Putative C3 11471582 CL | 11471581 | 0    | 0    | 0    | 0    | 0    | 0    | 0    | 3    | 3     | 0   | 100 | 0  | 100 |
| Total                   |          | 0    | 0    | 0    | 0    | 0    | 0    | 0    | 3    | 3     | 0   | 100 | 0  | 100 |



## R7 and R8 outgoing Identified-<3

| name                         | skid     | pR7a | pR7b | yR7a | yR7b | pR8a | pR8b | yR8a | yR8b | total | %R7   | %R8   | %p    | %y    |
|------------------------------|----------|------|------|------|------|------|------|------|------|-------|-------|-------|-------|-------|
| Putative Tm 11469206 HL      | 11469205 | 0    | 0    | 0    | 0    | 0    | 2    | 0    | 0    | 2     | 0.0   | 100.0 | 100.0 | 0.0   |
| Putative Tm 11458353 MF      | 11458352 | 0    | 0    | 0    | 0    | 2    | 0    | 0    | 0    | 2     | 0.0   | 100.0 | 100.0 | 0.0   |
| Putative Tm 11448401 MF      | 11448400 | 0    | 0    | 2    | 0    | 0    | 0    | 0    | 0    | 2     | 100.0 | 0.0   | 0.0   | 100.0 |
| Putative Tm 10649077 MF      | 10649076 | 0    | 0    | 0    | 0    | 0    | 0    | 2    | 0    | 2     | 0.0   | 100.0 | 0.0   | 100.0 |
| Putative Mt_VPN 4711709 ME   | 4711708  | 0    | 0    | 0    | 0    | 0    | 2    | 0    | 0    | 2     | 0.0   | 100.0 | 100.0 | 0.0   |
| Putative ML_VPN2 11474247 CL | 11671334 | 0    | 0    | 0    | 0    | 0    | 0    | 0    | 2    | 2     | 0.0   | 100.0 | 0.0   | 100.0 |
| Putative MeTu 14838260 AT    | 14838259 | 0    | 0    | 2    | 0    | 0    | 0    | 0    | 0    | 2     | 100.0 | 0.0   | 0.0   | 100.0 |
| Putative Dm2 11449695 HL     | 11449694 | 0    | 2    | 0    | 0    | 0    | 0    | 0    | 0    | 2     | 100.0 | 0.0   | 100.0 | 0.0   |
| Putative Dm11 11455072 HL    | 11455071 | 0    | 0    | 0    | 2    | 0    | 0    | 0    | 0    | 2     | 100.0 | 0.0   | 0.0   | 100.0 |
| Putative Dm 10562975 MF      | 10562974 | 0    | 2    | 0    | 0    | 0    | 0    | 0    | 0    | 2     | 100.0 | 0.0   | 100.0 | 0.0   |
| Putative C2 11472486 HL      | 11472485 | 0    | 0    | 0    | 0    | 0    | 2    | 0    | 0    | 2     | 0.0   | 100.0 | 100.0 | 0.0   |
| Putative Tm3 14359935 CL     | 14359934 | 0    | 0    | 1    | 0    | 0    | 0    | 0    | 0    | 1     | 100.0 | 0.0   | 0.0   | 100.0 |
| Putative Tm1 8942830690 CL   | 14653782 | 0    | 0    | 0    | 0    | 1    | 0    | 0    | 0    | 1     | 0.0   | 100.0 | 100.0 | 0.0   |
| Putative Tm 9725279989 CL    | 14767205 | 0    | 0    | 0    | 1    | 0    | 0    | 0    | 0    | 1     | 100.0 | 0.0   | 0.0   | 100.0 |
| Putative Tm 15805232 HL      | 15805231 | 0    | 0    | 1    | 0    | 0    | 0    | 0    | 0    | 1     | 100.0 | 0.0   | 0.0   | 100.0 |
| Putative Tm 11749586 HL      | 11749585 | 0    | 0    | 1    | 0    | 0    | 0    | 0    | 0    | 1     | 100.0 | 0.0   | 0.0   | 100.0 |
| Putative Tm 10657485 HL      | 10657484 | 0    | 0    | 1    | 0    | 0    | 0    | 0    | 0    | 1     | 100.0 | 0.0   | 0.0   | 100.0 |
| Putative Tm 10547529 MF      | 10547528 | 0    | 0    | 1    | 0    | 0    | 0    | 0    | 0    | 1     | 100.0 | 0.0   | 0.0   | 100.0 |
| Putative T1 11454504 MF      | 11454503 | 0    | 0    | 0    | 0    | 1    | 0    | 0    | 0    | 1     | 0.0   | 100.0 | 100.0 | 0.0   |
| Putative Mi14 8421422362 CL  | 14746351 | 0    | 0    | 0    | 0    | 1    | 0    | 0    | 0    | 1     | 0.0   | 100.0 | 100.0 | 0.0   |
| Putative Mi1 8809115577 CL   | 14880472 | 0    | 0    | 0    | 0    | 1    | 0    | 0    | 0    | 1     | 0.0   | 100.0 | 100.0 | 0.0   |
| Putative MeTu 10656251 MF    | 10656250 | 0    | 0    | 0    | 1    | 0    | 0    | 0    | 0    | 1     | 100.0 | 0.0   | 0.0   | 100.0 |
| Putative LaWF1 8286417189 CL | 14624795 | 0    | 0    | 0    | 0    | 0    | 1    | 0    | 0    | 1     | 0.0   | 100.0 | 100.0 | 0.0   |
| Putative Dm 11723760 MF      | 11723759 | 0    | 0    | 0    | 0    | 1    | 0    | 0    | 0    | 1     | 0.0   | 100.0 | 100.0 | 0.0   |
| Putative Dm 10638023 HL      | 10638022 | 0    | 0    | 1    | 0    | 0    | 0    | 0    | 0    | 1     | 100.0 | 0.0   | 0.0   | 100.0 |
| Putative Dm 10537971 MF      | 10537970 | 0    | 1    | 0    | 0    | 0    | 0    | 0    | 0    | 1     | 100.0 | 0.0   | 100.0 | 0.0   |
| Total                        |          | 0    | 5    | 10   | 4    | 7    | 7    | 2    | 2    | 37    | 51.4  | 48.6  | 51.4  | 48.6  |

## R7 and R8 outgoing Unidentified->=3

| name               | skid     | pR7a | pR7b | yR7a | yR7b | pR8a | pR8b | yR8a | yR8b | total | %R7 | %R8 | %p    | %y    |
|--------------------|----------|------|------|------|------|------|------|------|------|-------|-----|-----|-------|-------|
| Neuron 15934960 HL | 15934959 | 0    | 0    | 0    | 0    | 0    | 5    | 0    | 0    | 5     | 0   | 100 | 100.0 | 0.0   |
| neuron 11652951 HL | 11469649 | 0    | 0    | 0    | 0    | 0    | 0    | 2    | 1    | 3     | 0   | 100 | 0.0   | 100.0 |
| Total              |          | 0    | 0    | 0    | 0    | 0    | 5    | 2    | 1    | 8     | 0   | 100 | 62.5  | 37.5  |

## R7 and R8 outgoing Unidentified-<3

| name                  | skid     | pR7a | pR7b | yR7a | yR7b | pR8a | pR8b | yR8a | yR8b | total | %R7   | %R8   | %p    | %y    |
|-----------------------|----------|------|------|------|------|------|------|------|------|-------|-------|-------|-------|-------|
| neuron 8674787766 HL  | 15942569 | 0    | 0    | 0    | 0    | 0    | 0    | 0    | 2    | 2     | 0.0   | 100.0 | 0.0   | 100.0 |
| neuron 8454892 SMA    | 8454891  | 0    | 0    | 0    | 0    | 0    | 0    | 0    | 2    | 2     | 0.0   | 100.0 | 0.0   | 100.0 |
| Neuron 217388042 HL   | 15984291 | 0    | 2    | 0    | 0    | 0    | 0    | 0    | 0    | 2     | 100.0 | 0.0   | 100.0 | 0.0   |
| neuron 17131131 MF    | 17131130 | 0    | 0    | 0    | 0    | 0    | 0    | 2    | 0    | 2     | 0.0   | 100.0 | 0.0   | 100.0 |
| neuron 11483242 HL    | 11483241 | 0    | 0    | 0    | 0    | 0    | 0    | 2    | 0    | 2     | 0.0   | 100.0 | 0.0   | 100.0 |
| neuron 11470831 HL    | 11470830 | 0    | 0    | 0    | 0    | 0    | 2    | 0    | 0    | 2     | 0.0   | 100.0 | 100.0 | 0.0   |
| neuron 11326962 CL    | 11326961 | 0    | 0    | 1    | 0    | 0    | 0    | 1    | 0    | 2     | 50.0  | 50.0  | 0.0   | 100.0 |
| neuron 10563217 MF    | 10563216 | 0    | 2    | 0    | 0    | 0    | 0    | 0    | 0    | 2     | 100.0 | 0.0   | 100.0 | 0.0   |
| neuron 17159865       | 17159864 | 0    | 0    | 0    | 0    | 1    | 0    | 0    | 0    | 1     | 0.0   | 100.0 | 100.0 | 0.0   |
| neuron 17131177 MF    | 17131176 | 1    | 0    | 0    | 0    | 0    | 0    | 0    | 0    | 1     | 100.0 | 0.0   | 100.0 | 0.0   |
| Neuron 15901693       | 15901692 | 0    | 0    | 1    | 0    | 0    | 0    | 0    | 0    | 1     | 100.0 | 0.0   | 0.0   | 100.0 |
| Neuron 11598593       | 11598592 | 0    | 0    | 0    | 0    | 1    | 0    | 0    | 0    | 1     | 0.0   | 100.0 | 100.0 | 0.0   |
| neuron 11512294 HL    | 11512293 | 0    | 0    | 0    | 0    | 0    | 1    | 0    | 0    | 1     | 0.0   | 100.0 | 100.0 | 0.0   |
| neuron 11511048       | 11511047 | 0    | 1    | 0    | 0    | 0    | 0    | 0    | 0    | 1     | 100.0 | 0.0   | 100.0 | 0.0   |
| neuron 11481388       | 11481387 | 0    | 0    | 0    | 0    | 0    | 0    | 1    | 0    | 1     | 0.0   | 100.0 | 0.0   | 100.0 |
| neuron 11480446       | 11480445 | 0    | 0    | 0    | 0    | 0    | 0    | 1    | 0    | 1     | 0.0   | 100.0 | 0.0   | 100.0 |
| neuron 11475567       | 11475566 | 0    | 0    | 0    | 0    | 0    | 0    | 1    | 0    | 1     | 0.0   | 100.0 | 0.0   | 100.0 |
| neuron 11474876       | 11474875 | 0    | 0    | 0    | 0    | 0    | 0    | 1    | 0    | 1     | 0.0   | 100.0 | 0.0   | 100.0 |
| neuron 11474415       | 11474414 | 0    | 0    | 0    | 0    | 0    | 0    | 0    | 1    | 1     | 0.0   | 100.0 | 0.0   | 100.0 |
| neuron 11474213 CL    | 11474212 | 0    | 0    | 0    | 0    | 0    | 0    | 0    | 1    | 1     | 0.0   | 100.0 | 0.0   | 100.0 |
| neuron 11474053       | 11474052 | 0    | 0    | 0    | 0    | 0    | 0    | 1    | 0    | 1     | 0.0   | 100.0 | 0.0   | 100.0 |
| neuron 11474033       | 11474032 | 0    | 0    | 0    | 0    | 0    | 0    | 1    | 0    | 1     | 0.0   | 100.0 | 0.0   | 100.0 |
| neuron 11474028       | 11474027 | 0    | 0    | 0    | 0    | 0    | 0    | 1    | 0    | 1     | 0.0   | 100.0 | 0.0   | 100.0 |
| neuron 11473958       | 11473957 | 0    | 0    | 0    | 0    | 0    | 0    | 1    | 0    | 1     | 0.0   | 100.0 | 0.0   | 100.0 |
| neuron 11473474 CL    | 11473473 | 0    | 0    | 0    | 0    | 0    | 0    | 0    | 1    | 1     | 0.0   | 100.0 | 0.0   | 100.0 |
| neuron 11472913       | 11472912 | 0    | 0    | 0    | 0    | 0    | 0    | 1    | 0    | 1     | 0.0   | 100.0 | 0.0   | 100.0 |
| neuron 11472423       | 11472422 | 0    | 0    | 0    | 0    | 0    | 0    | 0    | 1    | 1     | 0.0   | 100.0 | 0.0   | 100.0 |
| neuron 11471813 HL    | 11471812 | 0    | 0    | 0    | 0    | 0    | 1    | 0    | 0    | 1     | 0.0   | 100.0 | 100.0 | 0.0   |
| neuron 11471528       | 11471527 | 0    | 0    | 0    | 0    | 0    | 1    | 0    | 0    | 1     | 0.0   | 100.0 | 100.0 | 0.0   |
| neuron 11469592       | 11469591 | 0    | 0    | 0    | 0    | 0    | 1    | 0    | 0    | 1     | 0.0   | 100.0 | 100.0 | 0.0   |
| neuron 11469561       | 11469560 | 0    | 0    | 0    | 0    | 0    | 0    | 1    | 0    | 1     | 0.0   | 100.0 | 0.0   | 100.0 |
| neuron 11468662       | 11468661 | 0    | 0    | 0    | 0    | 0    | 0    | 0    | 1    | 1     | 0.0   | 100.0 | 0.0   | 100.0 |
| neuron 11467899       | 11467898 | 0    | 0    | 0    | 0    | 0    | 1    | 0    | 0    | 1     | 0.0   | 100.0 | 100.0 | 0.0   |
| neuron 11467356       | 11467355 | 0    | 0    | 0    | 0    | 0    | 1    | 0    | 0    | 1     | 0.0   | 100.0 | 100.0 | 0.0   |
| neuron 11459213       | 11459212 | 0    | 0    | 0    | 0    | 1    | 0    | 0    | 0    | 1     | 0.0   | 100.0 | 100.0 | 0.0   |
| neuron 11459079       | 11459078 | 0    | 0    | 0    | 0    | 1    | 0    | 0    | 0    | 1     | 0.0   | 100.0 | 100.0 | 0.0   |
| neuron 11458409       | 11458408 | 0    | 0    | 0    | 0    | 1    | 0    | 0    | 0    | 1     | 0.0   | 100.0 | 100.0 | 0.0   |
| neuron 11458393 CL    | 11458392 | 0    | 0    | 0    | 0    | 1    | 0    | 0    | 0    | 1     | 0.0   | 100.0 | 100.0 | 0.0   |
| neuron 11458262       | 11458261 | 0    | 0    | 0    | 0    | 1    | 0    | 0    | 0    | 1     | 0.0   | 100.0 | 100.0 | 0.0   |
| neuron 11458257       | 11458256 | 0    | 0    | 0    | 0    | 1    | 0    | 0    | 0    | 1     | 0.0   | 100.0 | 100.0 | 0.0   |
| neuron 11458247       | 11458246 | 0    | 0    | 0    | 0    | 1    | 0    | 0    | 0    | 1     | 0.0   | 100.0 | 100.0 | 0.0   |
| neuron 11458187       | 11458186 | 0    | 0    | 0    | 0    | 1    | 0    | 0    | 0    | 1     | 0.0   | 100.0 | 100.0 | 0.0   |
| neuron 11458100       | 11458099 | 0    | 0    | 0    | 0    | 1    | 0    | 0    | 0    | 1     | 0.0   | 100.0 | 100.0 | 0.0   |
| neuron 11458095       | 11458094 | 0    | 0    | 0    | 0    | 1    | 0    | 0    | 0    | 1     | 0.0   | 100.0 | 100.0 | 0.0   |
| neuron 11457627 MF    | 11457626 | 0    | 0    | 0    | 0    | 1    | 0    | 0    | 0    | 1     | 0.0   | 100.0 | 100.0 | 0.0   |
| neuron 11457032 MF    | 11457031 | 0    | 0    | 0    | 0    | 1    | 0    | 0    | 0    | 1     | 0.0   | 100.0 | 100.0 | 0.0   |
| neuron 11455152       | 11455151 | 0    | 0    | 0    | 1    | 0    | 0    | 0    | 0    | 1     | 100.0 | 0.0   | 0.0   | 100.0 |
| neuron 11454942       | 11454941 | 0    | 0    | 0    | 1    | 0    | 0    | 0    | 0    | 1     | 100.0 | 0.0   | 0.0   | 100.0 |
| neuron 11454742       | 11454741 | 0    | 0    | 0    | 1    | 0    | 0    | 0    | 0    | 1     | 100.0 | 0.0   | 0.0   | 100.0 |
| neuron 11453858       | 11453857 | 0    | 0    | 0    | 1    | 0    | 0    | 0    | 0    | 1     | 100.0 | 0.0   | 0.0   | 100.0 |
| neuron 11453555       | 11453554 | 0    | 0    | 0    | 1    | 0    | 0    | 0    | 0    | 1     | 100.0 | 0.0   | 0.0   | 100.0 |
| neuron 11453195       | 11453194 | 0    | 0    | 0    | 1    | 0    | 0    | 0    | 0    | 1     | 100.0 | 0.0   | 0.0   | 100.0 |
| neuron 11452412       | 11452411 | 0    | 0    | 1    | 0    | 0    | 0    | 0    | 0    | 1     | 100.0 | 0.0   | 0.0   | 100.0 |
| neuron 11449753       | 11449752 | 0    | 1    | 0    | 0    | 0    | 0    | 0    | 0    | 1     | 100.0 | 0.0   | 100.0 | 0.0   |
| neuron 11448908       | 11448907 | 0    | 1    | 0    | 0    | 0    | 0    | 0    | 0    | 1     | 100.0 | 0.0   | 100.0 | 0.0   |
| neuron 11448383       | 11448382 | 0    | 0    | 1    | 0    | 0    | 0    | 0    | 0    | 1     | 100.0 | 0.0   | 0.0   | 100.0 |
| neuron 11448211       | 11448210 | 0    | 0    | 1    | 0    | 0    | 0    | 0    | 0    | 1     | 100.0 | 0.0   | 0.0   | 100.0 |
| neuron 11448038       | 11448037 | 0    | 0    | 1    | 0    | 0    | 0    | 0    | 0    | 1     | 100.0 | 0.0   | 0.0   | 100.0 |
| neuron 11447605       | 11447604 | 0    | 0    | 1    | 0    | 0    | 0    | 0    | 0    | 1     | 100.0 | 0.0   | 0.0   | 100.0 |
| neuron 11447258 HL    | 11447257 | 0    | 0    | 1    | 0    | 0    | 0    | 0    | 0    | 1     | 100.0 | 0.0   | 0.0   | 100.0 |
| neuron 11446424 HL    | 11446423 | 1    | 0    | 0    | 0    | 0    | 0    | 0    | 0    | 1     | 100.0 | 0.0   | 100.0 | 0.0   |
| Google: 9334377939 HL | 15901648 | 0    | 0    | 1    | 0    | 0    | 0    | 0    | 0    | 1     | 100.0 | 0.0   | 0.0   | 100.0 |
| Total                 |          | 2    | 7    | 9    | 6    | 14   | 8    | 15   | 9    | 70    | 34.3  | 65.7  | 44.3  | 55.7  |

## R7 and R8 incoming Dm9

| name                     | skid     | pR7a | pR7b | yR7a | yR7b | pR8a | pR8b | yR8a | yR8b | total | %R7  | %R8  | %p    | %y    |
|--------------------------|----------|------|------|------|------|------|------|------|------|-------|------|------|-------|-------|
| Putative Dm9 11452428 MF | 11452427 | 45   | 35   | 39   | 35   | 33   | 36   | 29   | 29   | 281   | 54.8 | 45.2 | 53.0  | 47.0  |
| Putative Dm9 11447062 CL | 11447061 | 2    | 0    | 9    | 0    | 0    | 0    | 7    | 0    | 18    | 61.1 | 38.9 | 11.1  | 88.9  |
| Putative Dm9 11450496 CL | 11450495 | 0    | 0    | 3    | 4    | 0    | 0    | 2    | 3    | 12    | 58.3 | 41.7 | 0.0   | 100.0 |
| Putative Dm9 11484680 MF | 11484679 | 4    | 0    | 0    | 0    | 5    | 0    | 0    | 0    | 9     | 44.4 | 55.6 | 100.0 | 0.0   |
| Putative Dm9 11454715 CL | 11454714 | 0    | 0    | 0    | 2    | 0    | 3    | 0    | 2    | 7     | 28.6 | 71.4 | 42.9  | 57.1  |
| Putative Dm9 11444387 HL | 11444386 | 0    | 4    | 0    | 0    | 0    | 2    | 0    | 0    | 6     | 66.7 | 33.3 | 100.0 | 0.0   |
| Total                    |          | 51   | 39   | 51   | 41   | 38   | 41   | 38   | 34   | 333   | 54.7 | 45.3 | 50.8  | 49.2  |

## R7 and R8 incoming R8

| name                           | skid     | pR7a | pR7b | yR7a | yR7b | pR8a | pR8b | yR8a | yR8b | total | %R7   | %R8 | %p    | %y    |
|--------------------------------|----------|------|------|------|------|------|------|------|------|-------|-------|-----|-------|-------|
| Putative R8 col G1 10629255 MF | 10629254 | 0    | 0    | 46   | 0    | 0    | 0    | 0    | 0    | 46    | 100.0 | 0.0 | 0.0   | 100.0 |
| Putative R8 col A1 10086692 MF | 10086691 | 39   | 0    | 0    | 0    | 1    | 0    | 0    | 0    | 40    | 97.5  | 2.5 | 100.0 | 0.0   |
| Putative R8 col I1 11466409 HL | 11466408 | 0    | 36   | 0    | 0    | 0    | 0    | 0    | 0    | 36    | 100.0 | 0.0 | 100.0 | 0.0   |
| Putative R8 col H1 11468319 CL | 11468318 | 0    | 0    | 0    | 36   | 0    | 0    | 0    | 0    | 36    | 100.0 | 0.0 | 0.0   | 100.0 |
| Total                          |          | 39   | 36   | 46   | 36   | 1    | 0    | 0    | 0    | 158   | 99.4  | 0.6 | 48.1  | 51.9  |

## R7 and R8 incoming R7

| name                           | skid     | pR7a | pR7b | yR7a | yR7b | pR8a | pR8b | yR8a | yR8b | total | %R7 | %R8 | %p    | %y    |
|--------------------------------|----------|------|------|------|------|------|------|------|------|-------|-----|-----|-------|-------|
| Putative R7 col A1 10082583 MF | 10082582 | 0    | 0    | 0    | 0    | 20   | 0    | 0    | 0    | 20    | 0   | 100 | 100.0 | 0.0   |
| Putative R7 col H1 10653594 MF | 10653593 | 0    | 0    | 0    | 0    | 0    | 0    | 0    | 19   | 19    | 0   | 100 | 0.0   | 100.0 |
| Putative R7 col I1 10538511 MF | 10538510 | 0    | 0    | 0    | 0    | 0    | 11   | 0    | 0    | 11    | 0   | 100 | 100.0 | 0.0   |
| Putative R7 col G1 10585941 MF | 10585940 | 0    | 0    | 0    | 0    | 0    | 0    | 7    | 0    | 7     | 0   | 100 | 0.0   | 100.0 |
| Total                          |          | 0    | 0    | 0    | 0    | 20   | 11   | 7    | 19   | 57    | 0   | 100 | 54.4  | 45.6  |

## R7 and R8 incoming Mt-VPN

| name                       | skid     | pR7a | pR7b | yR7a | yR7b | pR8a | pR8b | yR8a | yR8b | total | %R7 | %R8 | %p | %y  |
|----------------------------|----------|------|------|------|------|------|------|------|------|-------|-----|-----|----|-----|
| Putative Mt_VPN 3401517 MR | 14286406 | 0    | 0    | 2    | 0    | 0    | 0    | 3    | 0    | 5     | 40  | 60  | 0  | 100 |
| Total                      |          | 0    | 0    | 2    | 0    | 0    | 0    | 3    | 0    | 5     | 40  | 60  | 0  | 100 |

## R7 and R8 incoming C2

| name                    | skid     | pR7a | pR7b | yR7a | yR7b | pR8a | pR8b | yR8a | yR8b | total | %R7 | %R8 | %p | %y |
|-------------------------|----------|------|------|------|------|------|------|------|------|-------|-----|-----|----|----|
| Putative C2 11453788 CL | 11453787 | 0    | 2    | 1    | 2    | 0    | 0    | 0    | 0    | 5     | 100 | 0   | 40 | 60 |
| Total                   |          | 0    | 2    | 1    | 2    | 0    | 0    | 0    | 0    | 5     | 100 | 0   | 40 | 60 |

## R7 and R8 incoming L3

| name                           | skid     | pR7a | pR7b | yR7a | yR7b | pR8a | pR8b | yR8a | yR8b | total | %R7 | %R8 | %p  | %y |
|--------------------------------|----------|------|------|------|------|------|------|------|------|-------|-----|-----|-----|----|
| Putative L3 col A1 11445252 MF | 11445251 | 0    | 0    | 0    | 0    | 4    | 0    | 0    | 0    | 4     | 0   | 100 | 100 | 0  |
| Total                          |          | 0    | 0    | 0    | 0    | 4    | 0    | 0    | 0    | 4     | 0   | 100 | 100 | 0  |

## R7 and R8 incoming Identified-<3

| name                           | skid     | pR7a | pR7b | yR7a | yR7b | pR8a | pR8b | yR8a | yR8b | total | %R7   | %R8   | %p    | %y    |
|--------------------------------|----------|------|------|------|------|------|------|------|------|-------|-------|-------|-------|-------|
| Putative Dm8 10109587 MF       | 10109586 | 2    | 0    | 0    | 0    | 0    | 0    | 0    | 0    | 2     | 100.0 | 0.0   | 100.0 | 0.0   |
| Putative R7 10653781 MF        | 10653780 | 0    | 0    | 0    | 2    | 0    | 0    | 0    | 0    | 2     | 100.0 | 0.0   | 0.0   | 100.0 |
| Putative L3 col I1 11448597 HL | 11448596 | 0    | 0    | 0    | 0    | 0    | 2    | 0    | 0    | 2     | 0.0   | 100.0 | 100.0 | 0.0   |
| Putative C2 11472486 HL        | 11472485 | 0    | 0    | 0    | 0    | 0    | 2    | 0    | 0    | 2     | 0.0   | 100.0 | 100.0 | 0.0   |
| Putative Mi15 11453819 CL      | 11453818 | 0    | 0    | 0    | 0    | 0    | 0    | 2    | 0    | 2     | 0.0   | 100.0 | 0.0   | 100.0 |
| Putative L3 col H1 11450470 CL | 11450469 | 0    | 0    | 0    | 0    | 0    | 0    | 0    | 2    | 2     | 0.0   | 100.0 | 0.0   | 100.0 |
| Putative Mi15 11450568 CL      | 11450567 | 0    | 0    | 0    | 0    | 0    | 0    | 0    | 2    | 2     | 0.0   | 100.0 | 0.0   | 100.0 |
| Putative C2 11456777 CL        | 11456776 | 1    | 0    | 0    | 0    | 0    | 0    | 0    | 0    | 1     | 100.0 | 0.0   | 100.0 | 0.0   |
| Putative Mi15 11484381 HL      | 11484380 | 0    | 1    | 0    | 0    | 0    | 0    | 0    | 0    | 1     | 100.0 | 0.0   | 100.0 | 0.0   |
| Putative Tm5b-like 11447921 MF | 11447920 | 0    | 0    | 0    | 0    | 0    | 0    | 1    | 0    | 1     | 0.0   | 100.0 | 0.0   | 100.0 |
| Putative Dm11 11450454 CL      | 11450453 | 0    | 0    | 0    | 0    | 0    | 0    | 0    | 1    | 1     | 0.0   | 100.0 | 0.0   | 100.0 |
| Total                          |          | 3    | 1    | 0    | 2    | 0    | 4    | 3    | 5    | 18    | 33.3  | 66.7  | 44.4  | 55.6  |

## R7 and R8 incoming Unidentified-<3

| name            | skid     | pR7a | pR7b | yR7a | yR7b | pR8a | pR8b | yR8a | yR8b | total | %R7 | %R8 | %p  | %y  |
|-----------------|----------|------|------|------|------|------|------|------|------|-------|-----|-----|-----|-----|
| neuron 11456493 | 11456492 | 0    | 1    | 0    | 0    | 0    | 0    | 0    | 0    | 1     | 100 | 0   | 100 | 0   |
| neuron 11679982 | 11679981 | 0    | 0    | 1    | 0    | 0    | 0    | 0    | 0    | 1     | 100 | 0   | 0   | 100 |
| neuron 11472423 | 11472422 | 0    | 0    | 0    | 1    | 0    | 0    | 0    | 0    | 1     | 100 | 0   | 0   | 100 |
| neuron 11466245 | 11466244 | 0    | 0    | 0    | 0    | 1    | 0    | 0    | 0    | 1     | 0   | 100 | 100 | 0   |
| Total           |          | 0    | 1    | 1    | 1    | 1    | 0    | 0    | 0    | 4     | 75  | 25  | 50  | 50  |

## R7-DRA and R8-DRA outgoing Dm-DRA1

| name                            | skid     | R7-DRA-a | R7-DRA-b | R7-DRA-c | R8-DRA-a | R8-DRA-b | R8-DRA-c | total | %R7-DRA | %R8-DRA |
|---------------------------------|----------|----------|----------|----------|----------|----------|----------|-------|---------|---------|
| Putative Dm-DRA1 10440161 TO    | 10440160 | 0        | 0        | 21       | 0        | 0        | 0        | 21    | 100     | 0       |
| Putative Dm-DRA1 11896102 EK    | 11896101 | 0        | 18       | 0        | 0        | 0        | 0        | 18    | 100     | 0       |
| Putative Dm-DRA1 16766813 EK    | 16766812 | 0        | 0        | 16       | 0        | 0        | 0        | 16    | 100     | 0       |
| Putative Dm-DRA1 12106450 TO    | 12106449 | 16       | 0        | 0        | 0        | 0        | 0        | 16    | 100     | 0       |
| Putative Dm-DRA1 10247371 TO    | 10247370 | 5        | 10       | 0        | 0        | 0        | 0        | 15    | 100     | 0       |
| Putative Dm-DRA1 17156428 EK    | 17156427 | 0        | 0        | 14       | 0        | 0        | 0        | 14    | 100     | 0       |
| Putative Dm-DRA1 17155322 EK    | 17155321 | 0        | 0        | 13       | 0        | 0        | 0        | 13    | 100     | 0       |
| Putative Dm-DRA1 14065299 GS-EK | 14065298 | 4        | 9        | 0        | 0        | 0        | 0        | 13    | 100     | 0       |
| Putative Dm-DRA1 10265807 TO EK | 10265806 | 8        | 5        | 0        | 0        | 0        | 0        | 13    | 100     | 0       |
| Putative Dm-DRA1 11903983 GS    | 11903982 | 0        | 10       | 0        | 0        | 0        | 0        | 10    | 100     | 0       |
| Putative Dm-DRA1 11992844 EK    | 11992843 | 9        | 0        | 0        | 0        | 0        | 0        | 9     | 100     | 0       |
| Putative Dm-DRA1 11141230 GS    | 11141229 | 0        | 9        | 0        | 0        | 0        | 0        | 9     | 100     | 0       |
| Putative Dm-DRA1 13979722 EK    | 13979721 | 6        | 2        | 0        | 0        | 0        | 0        | 8     | 100     | 0       |
| Putative Dm-DRA1 11993799 EK    | 11993798 | 7        | 0        | 0        | 0        | 0        | 0        | 7     | 100     | 0       |
| Putative Dm-DRA1 11993077 EK    | 11993076 | 7        | 0        | 0        | 0        | 0        | 0        | 7     | 100     | 0       |
| Putative Dm-DRA1 13607721 EK    | 13607720 | 6        | 0        | 0        | 0        | 0        | 0        | 6     | 100     | 0       |
| Putative Dm-DRA1 11769715 TO EK | 11769714 | 6        | 0        | 0        | 0        | 0        | 0        | 6     | 100     | 0       |
| Putative Dm-DRA1 17170764 EK    | 17170763 | 0        | 0        | 5        | 0        | 0        | 0        | 5     | 100     | 0       |
| Putative Dm-DRA1 15976818 EK    | 15976817 | 0        | 3        | 0        | 0        | 0        | 0        | 3     | 100     | 0       |
| Putative Dm-DRA1 11993696 EK    | 11993695 | 3        | 0        | 0        | 0        | 0        | 0        | 3     | 100     | 0       |
| Total                           |          | 77       | 66       | 69       | 0        | 0        | 0        | 212   | 100     | 0       |

## R7-DRA and R8-DRA outgoing Dm9

| name                     | skid     | R7-DRA-a | R7-DRA-b | R7-DRA-c | R8-DRA-a | R8-DRA-b | R8-DRA-c | total | %R7-DRA | %R8-DRA |
|--------------------------|----------|----------|----------|----------|----------|----------|----------|-------|---------|---------|
| Putative Dm9 12013130 EK | 12013129 | 0        | 0        | 31       | 0        | 0        | 36       | 67    | 46.3    | 53.7    |
| Putative Dm9 11916196 EK | 11916195 | 26       | 0        | 0        | 36       | 0        | 0        | 62    | 41.9    | 58.1    |
| Putative Dm9 10657501 GS | 10657500 | 0        | 17       | 0        | 0        | 35       | 0        | 52    | 32.7    | 67.3    |
| Putative Dm9 14310275 GS | 14310274 | 0        | 16       | 0        | 0        | 5        | 0        | 21    | 76.2    | 23.8    |
| Putative Dm9 14933803 EK | 14933802 | 0        | 3        | 0        | 0        | 1        | 0        | 4     | 75.0    | 25.0    |
| Putative Dm9 10655889 EK | 10655888 | 0        | 2        | 0        | 0        | 2        | 0        | 4     | 50.0    | 50.0    |
| Total                    |          | 26       | 38       | 31       | 36       | 43       | 36       | 210   | 45.2    | 54.8    |

## R7-DRA and R8-DRA outgoing MeTu-DRA

| name                            | skid     | R7-DRA-a | R7-DRA-b | R7-DRA-c | R8-DRA-a | R8-DRA-b | R8-DRA-c | total | %R7-DRA | %R8-DRA |
|---------------------------------|----------|----------|----------|----------|----------|----------|----------|-------|---------|---------|
| Putative MeTu_DRA 11995074 EK   | 11995073 | 14       | 0        | 0        | 0        | 0        | 0        | 14    | 100     | 0       |
| Putative MeTu_DRA 11994449 EK   | 11994448 | 12       | 0        | 0        | 0        | 0        | 0        | 12    | 100     | 0       |
| Putative MeTu_DRA 11908711 GS   | 11908710 | 0        | 10       | 0        | 0        | 0        | 0        | 10    | 100     | 0       |
| Putative MeTu_DRA 11695294 PA   | 11695293 | 0        | 0        | 10       | 0        | 0        | 0        | 10    | 100     | 0       |
| Putative MeTu_DRA 10737979 TO   | 15749047 | 10       | 0        | 0        | 0        | 0        | 0        | 10    | 100     | 0       |
| Putative MeTu_DRA 12106384 EK   | 12106383 | 0        | 0        | 9        | 0        | 0        | 0        | 9     | 100     | 0       |
| Putative MeTu_DRA 11994564 EK   | 11994563 | 8        | 0        | 0        | 0        | 0        | 0        | 8     | 100     | 0       |
| Putative MeTu_DRA 10438340 TO   | 10438339 | 0        | 0        | 8        | 0        | 0        | 0        | 8     | 100     | 0       |
| Putative MeTu_DRA 7749081264 EK | 15952007 | 0        | 0        | 7        | 0        | 0        | 0        | 7     | 100     | 0       |
| Putative MeTu_DRA 13136157 EK   | 13136156 | 0        | 7        | 0        | 0        | 0        | 0        | 7     | 100     | 0       |
| Putative MeTu_DRA 11995103 EK   | 11995102 | 7        | 0        | 0        | 0        | 0        | 0        | 7     | 100     | 0       |
| Putative MeTu_DRA 15616478 EK   | 15616477 | 0        | 6        | 0        | 0        | 0        | 0        | 6     | 100     | 0       |
| Putative MeTu_DRA 15600899 EK   | 15600898 | 0        | 6        | 0        | 0        | 0        | 0        | 6     | 100     | 0       |
| Putative MeTu_DRA 11993031 EK   | 11993030 | 6        | 0        | 0        | 0        | 0        | 0        | 6     | 100     | 0       |
| Putative MeTu_DRA 10479162 TO   | 15698953 | 0        | 6        | 0        | 0        | 0        | 0        | 6     | 100     | 0       |
| Putative MeTu_DRA 12127370 TO   | 12127369 | 5        | 0        | 0        | 0        | 0        | 0        | 5     | 100     | 0       |
| Putative MeTu_DRA 11993383 EK   | 11993382 | 5        | 0        | 0        | 0        | 0        | 0        | 5     | 100     | 0       |
| Putative MeTu_DRA 11992933 EK   | 11992932 | 5        | 0        | 0        | 0        | 0        | 0        | 5     | 100     | 0       |
| Putative MeTu_DRA 6844453075 EK | 15949451 | 0        | 0        | 4        | 0        | 0        | 0        | 4     | 100     | 0       |
| Putative MeTu_DRA 17250637 EK   | 17250636 | 0        | 0        | 4        | 0        | 0        | 0        | 4     | 100     | 0       |
| Putative MeTu_DRA 14889232 EK   | 14889231 | 0        | 0        | 4        | 0        | 0        | 0        | 4     | 100     | 0       |
| Putative MeTu_DRA 11995359 EK   | 11995358 | 4        | 0        | 0        | 0        | 0        | 0        | 4     | 100     | 0       |
| Putative MeTu_DRA 11993353 EK   | 11993352 | 4        | 0        | 0        | 0        | 0        | 0        | 4     | 100     | 0       |
| Putative MeTu_DRA 11993315 EK   | 11993314 | 2        | 2        | 0        | 0        | 0        | 0        | 4     | 100     | 0       |
| Putative MeTu_DRA 11908744 GS   | 11908743 | 0        | 4        | 0        | 0        | 0        | 0        | 4     | 100     | 0       |
| Putative MeTu_DRA 9706730253 EK | 14864504 | 0        | 3        | 0        | 0        | 0        | 0        | 3     | 100     | 0       |
| Putative MeTu_DRA 14936635 EK   | 14936634 | 0        | 0        | 3        | 0        | 0        | 0        | 3     | 100     | 0       |
| Putative MeTu_DRA 11993065 EK   | 11993064 | 3        | 0        | 0        | 0        | 0        | 0        | 3     | 100     | 0       |
| Putative MeTu_DRA 11908669 GS   | 11908668 | 0        | 3        | 0        | 0        | 0        | 0        | 3     | 100     | 0       |
| Putative MeTu_DRA 11903993 EK   | 11903992 | 0        | 3        | 0        | 0        | 0        | 0        | 3     | 100     | 0       |
| Total                           |          | 85       | 50       | 49       | 0        | 0        | 0        | 184   | 100     | 0       |

## R7-DRA and R8-DRA outgoing R7-DRA

| name                        | skid     | R7-DRA-a | R7-DRA-b | R7-DRA-c | R8-DRA-a | R8-DRA-b | R8-DRA-c | total | %R7-DRA | %R8-DRA |
|-----------------------------|----------|----------|----------|----------|----------|----------|----------|-------|---------|---------|
| Putative R7_DRA 11728780 TO | 11728779 | 0        | 0        | 1        | 0        | 0        | 37       | 38    | 2.6     | 97.4    |
| Putative R7_DRA 10300950 TO | 10300949 | 0        | 0        | 0        | 0        | 38       | 0        | 38    | 0.0     | 100.0   |
| Putative R7_DRA 10191736 TO | 10191735 | 0        | 0        | 0        | 33       | 0        | 0        | 33    | 0.0     | 100.0   |
| Total                       |          | 0        | 0        | 1        | 33       | 38       | 37       | 109   | 0.9     | 99.1    |

## R7-DRA and R8-DRA outgoing Dm-DRA2

| name                         | skid     | R7-DRA-a | R7-DRA-b | R7-DRA-c | R8-DRA-a | R8-DRA-b | R8-DRA-c | total | %R7-DRA | %R8-DRA |
|------------------------------|----------|----------|----------|----------|----------|----------|----------|-------|---------|---------|
| Putative Dm-DRA2 10411789 TO | 10411788 | 0        | 1        | 0        | 0        | 31       | 0        | 32    | 3.1     | 96.9    |
| Putative Dm-DRA2 10483849 TO | 10483848 | 0        | 0        | 0        | 19       | 0        | 0        | 19    | 0.0     | 100.0   |
| Putative Dm-DRA2 11710980 TO | 11710979 | 0        | 0        | 1        | 0        | 0        | 12       | 13    | 7.7     | 92.3    |
| Putative Dm-DRA2 10449077 TO | 10449076 | 0        | 0        | 0        | 9        | 0        | 0        | 9     | 0.0     | 100.0   |
| Putative Dm-DRA2 10484772 TO | 10484771 | 0        | 0        | 0        | 0        | 8        | 0        | 8     | 0.0     | 100.0   |
| Putative Dm-DRA2 17163677 EK | 17163676 | 0        | 0        | 0        | 0        | 0        | 7        | 7     | 0.0     | 100.0   |
| Putative Dm-DRA2 13262260 EK | 13262259 | 0        | 0        | 0        | 7        | 0        | 0        | 7     | 0.0     | 100.0   |
| Putative Dm-DRA2 14311484 GS | 14311483 | 0        | 1        | 0        | 0        | 5        | 0        | 6     | 16.7    | 83.3    |
| Putative Dm-DRA2 11918437 EK | 11918436 | 0        | 0        | 0        | 5        | 0        | 0        | 5     | 0.0     | 100.0   |
| Total                        |          | 0        | 2        | 1        | 40       | 44       | 19       | 106   | 2.8     | 97.2    |

## R7-DRA and R8-DRA outgoing Dm2

| name                     | skid     | R7-DRA-a | R7-DRA-b | R7-DRA-c | R8-DRA-a | R8-DRA-b | R8-DRA-c | total | %R7-DRA | %R8-DRA |
|--------------------------|----------|----------|----------|----------|----------|----------|----------|-------|---------|---------|
| Putative Dm2 17162383 EK | 17162382 | 0        | 0        | 6        | 0        | 0        | 15       | 21    | 28.6    | 71.4    |
| Putative Dm2 11918131 EK | 11918130 | 5        | 0        | 0        | 7        | 0        | 0        | 12    | 41.7    | 58.3    |
| Putative Dm2 14065354 EK | 14065353 | 0        | 10       | 0        | 0        | 1        | 0        | 11    | 90.9    | 9.1     |
| Putative Dm2 10655669 TO | 10655668 | 0        | 0        | 0        | 0        | 4        | 0        | 4     | 0.0     | 100.0   |
| Total                    |          | 5        | 10       | 6        | 7        | 5        | 15       | 48    | 43.8    | 56.2    |

## R7-DRA and R8-DRA outgoing R8-DRA

| name                        | skid     | R7-DRA-a | R7-DRA-b | R7-DRA-c | R8-DRA-a | R8-DRA-b | R8-DRA-c | total | %R7-DRA | %R8-DRA |
|-----------------------------|----------|----------|----------|----------|----------|----------|----------|-------|---------|---------|
| Putative R8_DRA 10300964 TO | 10300963 | 0        | 16       | 0        | 0        | 0        | 0        | 16    | 100.0   | 0.0     |
| Putative R8_DRA 11728828 TO | 11728827 | 0        | 0        | 15       | 0        | 0        | 0        | 15    | 100.0   | 0.0     |
| Putative R8_DRA 10190509 TO | 10190508 | 10       | 0        | 0        | 1        | 0        | 0        | 11    | 90.9    | 9.1     |
| Total                       |          | 10       | 16       | 15       | 1        | 0        | 0        | 42    | 97.6    | 2.4     |

## R7-DRA and R8-DRA outgoing Mi15

| name                      | skid     | R7-DRA-a | R7-DRA-b | R7-DRA-c | R8-DRA-a | R8-DRA-b | R8-DRA-c | total | %R7-DRA | %R8-DRA |
|---------------------------|----------|----------|----------|----------|----------|----------|----------|-------|---------|---------|
| Putative Mi15 10655927 TO | 10655926 | 0        | 8        | 0        | 0        | 10       | 0        | 18    | 44.4    | 55.6    |
| Putative Mi15 12017151 EK | 12017150 | 0        | 0        | 5        | 0        | 0        | 5        | 10    | 50.0    | 50.0    |
| Putative Mi15 11916191 EK | 11916190 | 4        | 0        | 0        | 3        | 0        | 0        | 7     | 57.1    | 42.9    |
| Putative Mi15 12002140 EK | 12002139 | 0        | 0        | 4        | 0        | 0        | 0        | 4     | 100.0   | 0.0     |
| Total                     |          | 4        | 8        | 9        | 3        | 10       | 5        | 39    | 53.8    | 46.2    |

## R7-DRA and R8-DRA outgoing Mti-DRA-1

| name                           | skid     | R7-DRA-a | R7-DRA-b | R7-DRA-c | R8-DRA-a | R8-DRA-b | R8-DRA-c | total | %R7-DRA | %R8-DRA |
|--------------------------------|----------|----------|----------|----------|----------|----------|----------|-------|---------|---------|
| Putative Mti_DRA_1 11993472 EK | 11993471 | 6        | 7        | 4        | 0        | 0        | 0        | 17    | 100     | 0       |
| Putative Mti_DRA_1 14430737 EK | 14430736 | 4        | 2        | 1        | 0        | 0        | 0        | 7     | 100     | 0       |
| Putative Mti_DRA_1 11994581 EK | 11994580 | 2        | 0        | 2        | 0        | 0        | 0        | 4     | 100     | 0       |
| Putative Mti_DRA_1 11995267 EK | 11995266 | 1        | 0        | 2        | 0        | 0        | 0        | 3     | 100     | 0       |
| Putative Mti_DRA_1 11686948 EK | 11686947 | 0        | 1        | 2        | 0        | 0        | 0        | 3     | 100     | 0       |
| Putative Mti_DRA_1 10474754 PA | 10474753 | 0        | 0        | 3        | 0        | 0        | 0        | 3     | 100     | 0       |
| Total                          |          | 13       | 10       | 14       | 0        | 0        | 0        | 37    | 100     | 0       |

## R7-DRA and R8-DRA outgoing MeMe-DRA

| name                          | skid     | R7-DRA-a | R7-DRA-b | R7-DRA-c | R8-DRA-a | R8-DRA-b | R8-DRA-c | total | %R7-DRA | %R8-DRA |
|-------------------------------|----------|----------|----------|----------|----------|----------|----------|-------|---------|---------|
| Putative MeMe_DRA 10439443 EK | 10439442 | 6        | 0        | 21       | 0        | 0        | 0        | 27    | 100     | 0       |
| Putative MeMe_DRA 11993544 EK | 11993543 | 9        | 0        | 0        | 0        | 0        | 0        | 9     | 100     | 0       |
| Total                         |          | 15       | 0        | 21       | 0        | 0        | 0        | 36    | 100     | 0       |

## R7-DRA and R8-DRA outgoing L3

| name                    | skid     | R7-DRA-a | R7-DRA-b | R7-DRA-c | R8-DRA-a | R8-DRA-b | R8-DRA-c | total | %R7-DRA | %R8-DRA |
|-------------------------|----------|----------|----------|----------|----------|----------|----------|-------|---------|---------|
| Putative L3 12018070 EK | 12018069 | 0        | 0        | 7        | 0        | 0        | 6        | 13    | 53.8    | 46.2    |
| Putative L3 10653986 EK | 10653985 | 0        | 5        | 0        | 0        | 7        | 0        | 12    | 41.7    | 58.3    |
| Putative L3 11917228 EK | 11917227 | 4        | 0        | 0        | 3        | 0        | 0        | 7     | 57.1    | 42.9    |
| Total                   |          | 4        | 5        | 7        | 3        | 7        | 6        | 32    | 50.0    | 50.0    |

## R7-DRA and R8-DRA outgoing VPN-DRA

| name                                 | skid     | R7-DRA-a | R7-DRA-b | R7-DRA-c | R8-DRA-a | R8-DRA-b | R8-DRA-c | total | %R7-DRA | %R8-DRA |
|--------------------------------------|----------|----------|----------|----------|----------|----------|----------|-------|---------|---------|
| Putative VPN_DRA ME.R 11992908 EK    | 11992907 | 2        | 0        | 6        | 0        | 0        | 0        | 8     | 100     | 0       |
| Putative VPN_DRA ME.R 11904074 GS EK | 11904073 | 5        | 2        | 0        | 0        | 0        | 0        | 7     | 100     | 0       |
| Putative VPN_DRA ME.R 4271777 EK     | 4271776  | 1        | 4        | 0        | 0        | 0        | 0        | 5     | 100     | 0       |
| Putative VPN_DRA ME.R 17165716 EK    | 17165715 | 0        | 0        | 4        | 0        | 0        | 0        | 4     | 100     | 0       |
| Putative VPN_DRA ME.R 8541155621 EK  | 15969128 | 3        | 0        | 0        | 0        | 0        | 0        | 3     | 100     | 0       |
| Putative VPN_DRA ME.R 16886431 PA    | 16886430 | 0        | 0        | 3        | 0        | 0        | 0        | 3     | 100     | 0       |
| Total                                |          | 11       | 6        | 13       | 0        | 0        | 0        | 30    | 100     | 0       |

## R7-DRA and R8-DRA outgoing L1

| name                       | skid     | R7-DRA-a | R7-DRA-b | R7-DRA-c | R8-DRA-a | R8-DRA-b | R8-DRA-c | total | %R7-DRA | %R8-DRA |
|----------------------------|----------|----------|----------|----------|----------|----------|----------|-------|---------|---------|
| Putative L1 10654563 EK-GS | 10654562 | 0        | 3        | 0        | 0        | 5        | 0        | 8     | 37.5    | 62.5    |
| Putative L1 11915726 EK    | 11915725 | 3        | 0        | 0        | 4        | 0        | 0        | 7     | 42.9    | 57.1    |
| Putative L1 12019445 EK    | 12019444 | 0        | 0        | 3        | 0        | 0        | 0        | 3     | 100.0   | 0.0     |
| Total                      |          | 3        | 3        | 3        | 4        | 5        | 0        | 18    | 50.0    | 50.0    |

## R7-DRA and R8-DRA outgoing Tm20

| name                      | skid     | R7-DRA-a | R7-DRA-b | R7-DRA-c | R8-DRA-a | R8-DRA-b | R8-DRA-c | total | %R7-DRA | %R8-DRA |
|---------------------------|----------|----------|----------|----------|----------|----------|----------|-------|---------|---------|
| Putative Tm20 12018770 EK | 12018769 | 0        | 0        | 0        | 0        | 0        | 8        | 8     | 0       | 100     |
| Putative Tm20 11918620 EK | 11918619 | 0        | 0        | 0        | 4        | 0        | 0        | 4     | 0       | 100     |
| Putative Tm20 10655482 EK | 10655481 | 0        | 0        | 0        | 0        | 4        | 0        | 4     | 0       | 100     |
| Total                     |          | 0        | 0        | 0        | 4        | 4        | 8        | 16    | 0       | 100     |

## R7-DRA and R8-DRA outgoing Mti-DRA-2

| name                           | skid     | R7-DRA-a | R7-DRA-b | R7-DRA-c | R8-DRA-a | R8-DRA-b | R8-DRA-c | total | %R7-DRA | %R8-DRA |
|--------------------------------|----------|----------|----------|----------|----------|----------|----------|-------|---------|---------|
| Putative Mti_DRA_2 11995289 EK | 11995288 | 5        | 0        | 0        | 0        | 0        | 0        | 5     | 100     | 0       |
| Putative Mti_DRA_2 11693572 PA | 11693571 | 0        | 0        | 4        | 0        | 0        | 0        | 4     | 100     | 0       |
| Putative Mti_DRA_2 11993445 EK | 11993444 | 3        | 0        | 0        | 0        | 0        | 0        | 3     | 100     | 0       |
| Putative Mti_DRA_2 11903803 GS | 11903802 | 0        | 3        | 0        | 0        | 0        | 0        | 3     | 100     | 0       |
| Total                          |          | 8        | 3        | 4        | 0        | 0        | 0        | 15    | 100     | 0       |

## R7-DRA and R8-DRA outgoing Mi1

| name                        | skid     | R7-DRA-a | R7-DRA-b | R7-DRA-c | R8-DRA-a | R8-DRA-b | R8-DRA-c | total | %R7-DRA | %R8-DRA |
|-----------------------------|----------|----------|----------|----------|----------|----------|----------|-------|---------|---------|
| Putative Mi1 11829851 HL    | 11829850 | 0        | 0        | 1        | 0        | 0        | 5        | 6     | 16.7    | 83.3    |
| Putative Mi1 13294452 EK    | 13294451 | 3        | 0        | 0        | 2        | 0        | 0        | 5     | 60.0    | 40.0    |
| Putative Mi1 11660604824 CL | 14811021 | 0        | 2        | 0        | 0        | 2        | 0        | 4     | 50.0    | 50.0    |
| Total                       |          | 3        | 2        | 1        | 2        | 2        | 5        | 15    | 40.0    | 60.0    |

## R7-DRA and R8-DRA outgoing MeTu

| name                      | skid     | R7-DRA-a | R7-DRA-b | R7-DRA-c | R8-DRA-a | R8-DRA-b | R8-DRA-c | total | %R7-DRA | %R8-DRA |
|---------------------------|----------|----------|----------|----------|----------|----------|----------|-------|---------|---------|
| Putative MeTu 16730683 AT | 16730682 | 0        | 0        | 8        | 0        | 0        | 0        | 8     | 100     | 0       |
| Putative MeTu 14888321 AT | 14888320 | 0        | 0        | 5        | 0        | 0        | 0        | 5     | 100     | 0       |
| Total                     |          | 0        | 0        | 13       | 0        | 0        | 0        | 13    | 100     | 0       |

## R7-DRA and R8-DRA outgoing Tm5-like

| name                          | skid     | R7-DRA-a | R7-DRA-b | R7-DRA-c | R8-DRA-a | R8-DRA-b | R8-DRA-c | total | %R7-DRA | %R8-DRA |
|-------------------------------|----------|----------|----------|----------|----------|----------|----------|-------|---------|---------|
| Putative Tm5-like 12016007 EK | 12016006 | 0        | 0        | 0        | 0        | 0        | 12       | 12    | 0       | 100     |
| Total                         |          | 0        | 0        | 0        | 0        | 0        | 12       | 12    | 0       | 100     |

## R7-DRA and R8-DRA outgoing Mi9

| name                     | skid     | R7-DRA-a | R7-DRA-b | R7-DRA-c | R8-DRA-a | R8-DRA-b | R8-DRA-c | total | %R7-DRA | %R8-DRA |
|--------------------------|----------|----------|----------|----------|----------|----------|----------|-------|---------|---------|
| Putative Mi9 12015967 EK | 12015966 | 0        | 0        | 0        | 0        | 0        | 9        | 9     | 0       | 100     |
| Putative Mi9 11918591 EK | 11918590 | 0        | 0        | 0        | 3        | 0        | 0        | 3     | 0       | 100     |
| Total                    |          | 0        | 0        | 0        | 3        | 0        | 9        | 12    | 0       | 100     |

## R7-DRA and R8-DRA outgoing Dm11

| name                      | skid     | R7-DRA-a | R7-DRA-b | R7-DRA-c | R8-DRA-a | R8-DRA-b | R8-DRA-c | total | %R7-DRA | %R8-DRA |
|---------------------------|----------|----------|----------|----------|----------|----------|----------|-------|---------|---------|
| Putative Dm11 17161736 EK | 17161735 | 0        | 0        | 4        | 0        | 0        | 8        | 12    | 33.3    | 66.7    |
| Total                     |          | 0        | 0        | 4        | 0        | 0        | 8        | 12    | 33.3    | 66.7    |

## R7-DRA and R8-DRA outgoing aMe12

| name                                                        | skid   | R7-DRA-a | R7-DRA-b | R7-DRA-c | R8-DRA-a | R8-DRA-b | R8-DRA-c | total | %R7-DRA | %R8-DRA |
|-------------------------------------------------------------|--------|----------|----------|----------|----------|----------|----------|-------|---------|---------|
| Putative aMe12 VPN MER to vACA OLCT bilateral 164545 GA ECM | 164544 | 0        | 1        | 2        | 0        | 1        | 0        | 4     | 75      | 25      |
| Total                                                       |        | 0        | 1        | 2        | 0        | 1        | 0        | 4     | 75      | 25      |

## R7-DRA and R8-DRA outgoing TmY

| name                     | skid     | R7-DRA-a | R7-DRA-b | R7-DRA-c | R8-DRA-a | R8-DRA-b | R8-DRA-c | total | %R7-DRA | %R8-DRA |
|--------------------------|----------|----------|----------|----------|----------|----------|----------|-------|---------|---------|
| Putative TmY 12043438 EK | 12043437 | 0        | 0        | 0        | 3        | 0        | 0        | 3     | 0       | 100     |
| Total                    |          | 0        | 0        | 0        | 3        | 0        | 0        | 3     | 0       | 100     |



## R7-DRA and R8-DRA outgoing ML-VPN2

| name                         | skid     | R7-DRA-a | R7-DRA-b | R7-DRA-c | R8-DRA-a | R8-DRA-b | R8-DRA-c | total | %R7-DRA | %R8-DRA |
|------------------------------|----------|----------|----------|----------|----------|----------|----------|-------|---------|---------|
| Putative ML_VPN2 11995243 EK | 11995242 | 3        | 0        | 0        | 0        | 0        | 0        | 3     | 100     | 0       |
| Total                        |          | 3        | 0        | 0        | 0        | 0        | 0        | 3     | 100     | 0       |

## R7-DRA and R8-DRA outgoing C2

| name                    | skid     | R7-DRA-a | R7-DRA-b | R7-DRA-c | R8-DRA-a | R8-DRA-b | R8-DRA-c | total | %R7-DRA | %R8-DRA |
|-------------------------|----------|----------|----------|----------|----------|----------|----------|-------|---------|---------|
| Putative C2 11906498 GS | 11906497 | 0        | 2        | 0        | 0        | 1        | 0        | 3     | 66.7    | 33.3    |
| Total                   |          | 0        | 2        | 0        | 0        | 1        | 0        | 3     | 66.7    | 33.3    |

## R7-DRA and R8-DRA outgoing Identified-<3

| name                                                      | skid     | R7-DRA-a | R7-DRA-b | R7-DRA-c | R8-DRA-a | R8-DRA-b | R8-DRA-c | total | %R7-DRA | %R8-DRA |
|-----------------------------------------------------------|----------|----------|----------|----------|----------|----------|----------|-------|---------|---------|
| Putative Tm5-like 12017355 EK                             | 12017354 | 0        | 0        | 2        | 0        | 0        | 0        | 2     | 100.0   | 0.0     |
| Putative Mi9 10655487 EK                                  | 10655486 | 0        | 0        | 0        | 0        | 2        | 0        | 2     | 0.0     | 100.0   |
| Putative MeTu_DRA 11993247 EK                             | 15749075 | 2        | 0        | 0        | 0        | 0        | 0        | 2     | 100.0   | 0.0     |
| Putative MeTu 10806612 EK                                 | 10806611 | 2        | 0        | 0        | 0        | 0        | 0        | 2     | 100.0   | 0.0     |
| Putative MeTu 10473597 EK                                 | 10473596 | 0        | 0        | 2        | 0        | 0        | 0        | 2     | 100.0   | 0.0     |
| Putative L2 12043826 EK                                   | 12043825 | 0        | 0        | 2        | 0        | 0        | 0        | 2     | 100.0   | 0.0     |
| Putative L2 11915907 EK                                   | 11915906 | 1        | 0        | 0        | 1        | 0        | 0        | 2     | 50.0    | 50.0    |
| Putative Dm2 17254551 EK                                  | 17254550 | 0        | 0        | 2        | 0        | 0        | 0        | 2     | 100.0   | 0.0     |
| Putative Dm2 14305319 EK                                  | 14305318 | 0        | 0        | 0        | 2        | 0        | 0        | 2     | 0.0     | 100.0   |
| Putative Dm 16110050 EK                                   | 16110049 | 0        | 2        | 0        | 0        | 0        | 0        | 2     | 100.0   | 0.0     |
| Putative Dm 11993804 EK                                   | 11993803 | 1        | 0        | 0        | 1        | 0        | 0        | 2     | 50.0    | 50.0    |
| Putative Dm 10479098 EK                                   | 10479097 | 2        | 0        | 0        | 0        | 0        | 0        | 2     | 100.0   | 0.0     |
| Putative Dm-DRA2 11981476 EK                              | 11981475 | 0        | 0        | 0        | 2        | 0        | 0        | 2     | 0.0     | 100.0   |
| Putative C2 12044213 EK                                   | 12044212 | 0        | 0        | 1        | 0        | 0        | 1        | 2     | 50.0    | 50.0    |
| Putative aMe12 VPN MER to vACA OLCT bilateral 28842 AA GA | 28841    | 0        | 2        | 0        | 0        | 0        | 0        | 2     | 100.0   | 0.0     |
| Putative VPN_DRA MER 8656926956 EK                        | 15997281 | 0        | 1        | 0        | 0        | 0        | 0        | 1     | 100.0   | 0.0     |
| Putative VPN_DRA MER 16215492 EK                          | 16215491 | 0        | 1        | 0        | 0        | 0        | 0        | 1     | 100.0   | 0.0     |
| Putative VPN_DRA MER 12188203 EK                          | 12188202 | 1        | 0        | 0        | 0        | 0        | 0        | 1     | 100.0   | 0.0     |
| Putative VPN_DRA MER 10088063089 EK                       | 15984100 | 1        | 0        | 0        | 0        | 0        | 0        | 1     | 100.0   | 0.0     |
| Putative T2 17252542 EK                                   | 17252541 | 0        | 0        | 1        | 0        | 0        | 0        | 1     | 100.0   | 0.0     |
| Putative Mt_DRA_2 12109027 EK                             | 12109026 | 1        | 0        | 0        | 0        | 0        | 0        | 1     | 100.0   | 0.0     |
| Putative Mt_DRA_2 11993433 EK                             | 11993432 | 1        | 0        | 0        | 0        | 0        | 0        | 1     | 100.0   | 0.0     |
| Putative Mt_DRA_2 11992771 EK                             | 11992770 | 1        | 0        | 0        | 0        | 0        | 0        | 1     | 100.0   | 0.0     |
| Putative Mi9 11947153 EK                                  | 11947152 | 0        | 0        | 0        | 1        | 0        | 0        | 1     | 0.0     | 100.0   |
| Putative Mi4 12045603 EK                                  | 12045602 | 0        | 0        | 0        | 0        | 1        | 0        | 1     | 0.0     | 100.0   |
| Putative MeTu_DRA 10820917 EK                             | 10820916 | 1        | 0        | 0        | 0        | 0        | 0        | 1     | 100.0   | 0.0     |
| Putative MeTu_DRA 10755132 EK                             | 10755131 | 1        | 0        | 0        | 0        | 0        | 0        | 1     | 100.0   | 0.0     |
| Putative MeTu 4735813145 EK                               | 15978559 | 0        | 1        | 0        | 0        | 0        | 0        | 1     | 100.0   | 0.0     |
| Putative MeTu 14726393 MF                                 | 14726392 | 1        | 0        | 0        | 0        | 0        | 0        | 1     | 100.0   | 0.0     |
| Putative L3 6831613493 EK                                 | 15970720 | 0        | 1        | 0        | 0        | 0        | 0        | 1     | 100.0   | 0.0     |
| Putative L3 17253296 EK                                   | 17253295 | 0        | 0        | 0        | 0        | 0        | 1        | 1     | 0.0     | 100.0   |
| Putative Dm3 12018854 EK                                  | 12018853 | 0        | 0        | 0        | 0        | 0        | 1        | 1     | 0.0     | 100.0   |
| Putative C3 12002623 EK                                   | 12002622 | 0        | 0        | 0        | 0        | 0        | 1        | 1     | 0.0     | 100.0   |
| Total                                                     |          | 16       | 8        | 10       | 7        | 3        | 4        | 48    | 70.8    | 29.2    |

## R7-DRA and R8-DRA outgoing Unidentified->=3

| name                               | skid     | R7-DRA-a | R7-DRA-b | R7-DRA-c | R8-DRA-a | R8-DRA-b | R8-DRA-c | total | %R7-DRA | %R8-DRA |
|------------------------------------|----------|----------|----------|----------|----------|----------|----------|-------|---------|---------|
| Neuron 15007628 (not traceable) EK | 15007627 | 0        | 5        | 0        | 0        | 0        | 0        | 5     | 100     | 0       |
| 10655594 EK (untraceable)          | 10655593 | 0        | 0        | 0        | 0        | 5        | 0        | 5     | 0       | 100     |
| Total                              |          | 0        | 5        | 0        | 0        | 5        | 0        | 10    | 50      | 50      |

## R7-DRA and R8-DRA outgoing Unidentified-<3

| name                               | skid     | R7-DRA-a | R7-DRA-b | R7-DRA-c | R8-DRA-a | R8-DRA-b | R8-DRA-c | total | %R7-DRA | %R8-DRA |
|------------------------------------|----------|----------|----------|----------|----------|----------|----------|-------|---------|---------|
| Neuron 15767888                    | 15767887 | 0        | 2        | 0        | 0        | 0        | 0        | 2     | 100.0   | 0.0     |
| Neuron 14867404                    | 14867403 | 0        | 2        | 0        | 0        | 0        | 0        | 2     | 100.0   | 0.0     |
| Neuron 14788296 EK                 | 14788295 | 0        | 2        | 0        | 0        | 0        | 0        | 2     | 100.0   | 0.0     |
| neuron 11994901 EK                 | 11994900 | 0        | 0        | 0        | 2        | 0        | 0        | 2     | 0.0     | 100.0   |
| neuron 11947310 EK (untraceable)   | 11947309 | 0        | 0        | 0        | 2        | 0        | 0        | 2     | 0.0     | 100.0   |
| neuron 11918119 EK (untraceable)   | 11918118 | 0        | 0        | 0        | 2        | 0        | 0        | 2     | 0.0     | 100.0   |
| neuron 11918097 EK (untraceable)   | 11918096 | 0        | 0        | 0        | 2        | 0        | 0        | 2     | 0.0     | 100.0   |
| neuron 11904799 GS (untraceable)   | 11904798 | 0        | 2        | 0        | 0        | 0        | 0        | 2     | 100.0   | 0.0     |
| neuron 11904043 GS (not traceable) | 11904042 | 0        | 2        | 0        | 0        | 0        | 0        | 2     | 100.0   | 0.0     |
| neuron 11903818 GS (not traceable) | 11903817 | 0        | 2        | 0        | 0        | 0        | 0        | 2     | 100.0   | 0.0     |
| Neuron 14991389                    | 14991388 | 0        | 1        | 0        | 0        | 0        | 0        | 1     | 100.0   | 0.0     |
| Neuron 14798841                    | 14798840 | 0        | 1        | 0        | 0        | 0        | 0        | 1     | 100.0   | 0.0     |
| Neuron 14315234                    | 14315233 | 0        | 0        | 0        | 0        | 1        | 0        | 1     | 0.0     | 100.0   |
| Neuron 14081457 GS                 | 14081456 | 0        | 1        | 0        | 0        | 0        | 0        | 1     | 100.0   | 0.0     |
| Neuron 13938782                    | 13938781 | 0        | 1        | 0        | 0        | 0        | 0        | 1     | 100.0   | 0.0     |
| Neuron 13433448 EK (untraceable)   | 13433447 | 1        | 0        | 0        | 0        | 0        | 0        | 1     | 100.0   | 0.0     |
| neuron 13179813 EK                 | 13179812 | 0        | 1        | 0        | 0        | 0        | 0        | 1     | 100.0   | 0.0     |
| neuron 12043433 EK                 | 12043432 | 0        | 0        | 0        | 1        | 0        | 0        | 1     | 0.0     | 100.0   |
| neuron 12019263                    | 12019262 | 0        | 0        | 1        | 0        | 0        | 0        | 1     | 100.0   | 0.0     |
| neuron 12019256                    | 12019255 | 0        | 0        | 0        | 0        | 0        | 1        | 1     | 0.0     | 100.0   |
| neuron 12018755                    | 12018754 | 0        | 0        | 0        | 0        | 0        | 1        | 1     | 0.0     | 100.0   |
| neuron 12017797                    | 12017796 | 0        | 0        | 1        | 0        | 0        | 0        | 1     | 100.0   | 0.0     |
| neuron 12017523                    | 12017522 | 0        | 0        | 1        | 0        | 0        | 0        | 1     | 100.0   | 0.0     |
| neuron 12017236                    | 12017235 | 0        | 0        | 0        | 0        | 0        | 1        | 1     | 0.0     | 100.0   |
| neuron 12017107                    | 12017106 | 0        | 0        | 0        | 0        | 0        | 1        | 1     | 0.0     | 100.0   |
| neuron 12016873                    | 12016872 | 0        | 0        | 0        | 0        | 0        | 1        | 1     | 0.0     | 100.0   |
| neuron 12016687                    | 12016686 | 0        | 0        | 1        | 0        | 0        | 0        | 1     | 100.0   | 0.0     |
| neuron 12016413                    | 12016412 | 0        | 0        | 0        | 0        | 0        | 1        | 1     | 0.0     | 100.0   |
| neuron 12015890                    | 12015889 | 0        | 0        | 0        | 0        | 0        | 1        | 1     | 0.0     | 100.0   |
| neuron 12015018                    | 12015017 | 0        | 0        | 1        | 0        | 0        | 0        | 1     | 100.0   | 0.0     |
| neuron 12014001                    | 12014000 | 0        | 0        | 1        | 0        | 0        | 0        | 1     | 100.0   | 0.0     |
| neuron 12013715                    | 12013714 | 0        | 0        | 1        | 0        | 0        | 0        | 1     | 100.0   | 0.0     |
| neuron 12002539                    | 12002538 | 0        | 0        | 1        | 0        | 0        | 0        | 1     | 100.0   | 0.0     |
| neuron 12002237                    | 12002236 | 0        | 0        | 1        | 0        | 0        | 0        | 1     | 100.0   | 0.0     |
| neuron 12002170                    | 12002169 | 0        | 0        | 1        | 0        | 0        | 0        | 1     | 100.0   | 0.0     |
| neuron 12002160                    | 12002159 | 0        | 0        | 1        | 0        | 0        | 0        | 1     | 100.0   | 0.0     |
| neuron 11995171 EK                 | 11995170 | 1        | 0        | 0        | 0        | 0        | 0        | 1     | 100.0   | 0.0     |
| neuron 11995069 EK                 | 11995068 | 1        | 0        | 0        | 0        | 0        | 0        | 1     | 100.0   | 0.0     |
| neuron 11995028 EK                 | 11995027 | 1        | 0        | 0        | 0        | 0        | 0        | 1     | 100.0   | 0.0     |
| neuron 11994592 EK                 | 11994591 | 1        | 0        | 0        | 0        | 0        | 0        | 1     | 100.0   | 0.0     |
| neuron 11994244 EK                 | 11994243 | 1        | 0        | 0        | 0        | 0        | 0        | 1     | 100.0   | 0.0     |
| neuron 11993824 EK                 | 11993823 | 1        | 0        | 0        | 0        | 0        | 0        | 1     | 100.0   | 0.0     |
| neuron 11992865 EK                 | 11992864 | 1        | 0        | 0        | 0        | 0        | 0        | 1     | 100.0   | 0.0     |
| neuron 11981310 EK                 | 11981309 | 0        | 0        | 0        | 1        | 0        | 0        | 1     | 0.0     | 100.0   |
| neuron 11981299 EK                 | 11981298 | 0        | 0        | 0        | 1        | 0        | 0        | 1     | 0.0     | 100.0   |
| neuron 11908911 GS                 | 11908910 | 0        | 0        | 0        | 0        | 1        | 0        | 1     | 0.0     | 100.0   |
| neuron 11908664                    | 11908663 | 0        | 1        | 0        | 0        | 0        | 0        | 1     | 100.0   | 0.0     |
| neuron 11904702                    | 11904701 | 0        | 1        | 0        | 0        | 0        | 0        | 1     | 100.0   | 0.0     |
| neuron 11904687                    | 11904686 | 0        | 1        | 0        | 0        | 0        | 0        | 1     | 100.0   | 0.0     |
| neuron 11904395                    | 11904394 | 0        | 1        | 0        | 0        | 0        | 0        | 1     | 100.0   | 0.0     |
| neuron 11904241                    | 11904240 | 0        | 1        | 0        | 0        | 0        | 0        | 1     | 100.0   | 0.0     |
| neuron 11904203                    | 11904202 | 0        | 1        | 0        | 0        | 0        | 0        | 1     | 100.0   | 0.0     |
| neuron 11904153                    | 11904152 | 0        | 1        | 0        | 0        | 0        | 0        | 1     | 100.0   | 0.0     |
| neuron 11904033                    | 11904032 | 0        | 1        | 0        | 0        | 0        | 0        | 1     | 100.0   | 0.0     |
| neuron 11903739                    | 11903738 | 0        | 1        | 0        | 0        | 0        | 0        | 1     | 100.0   | 0.0     |
| neuron 11902130                    | 11902129 | 0        | 1        | 0        | 0        | 0        | 0        | 1     | 100.0   | 0.0     |
| neuron 11829995                    | 11829994 | 0        | 0        | 0        | 0        | 0        | 1        | 1     | 0.0     | 100.0   |
| Total                              |          | 8        | 27       | 11       | 11       | 2        | 8        | 67    | 68.7    | 31.3    |

## R7-DRA and R8-DRA incoming Dm9

| name                     | skid     | R7-DRA-a | R7-DRA-b | R7-DRA-c | R8-DRA-a | R8-DRA-b | R8-DRA-c | total | %R7-DRA | %R8-DRA |
|--------------------------|----------|----------|----------|----------|----------|----------|----------|-------|---------|---------|
| Putative Dm9 11916196 EK | 11916195 | 39       | 0        | 0        | 34       | 0        | 0        | 73    | 53.4    | 46.6    |
| Putative Dm9 12013130 EK | 12013129 | 0        | 0        | 34       | 0        | 0        | 35       | 69    | 49.3    | 50.7    |
| Putative Dm9 10657501 GS | 10657500 | 0        | 30       | 0        | 0        | 36       | 0        | 66    | 45.5    | 54.5    |
| Putative Dm9 10655889 EK | 10655888 | 0        | 2        | 0        | 0        | 1        | 0        | 3     | 66.7    | 33.3    |
| Total                    |          | 39       | 32       | 34       | 34       | 37       | 35       | 211   | 49.8    | 50.2    |

## R7-DRA and R8-DRA incoming R8-DRA

| name                        | skid     | R7-DRA-a | R7-DRA-b | R7-DRA-c | R8-DRA-a | R8-DRA-b | R8-DRA-c | total | %R7-DRA | %R8-DRA |
|-----------------------------|----------|----------|----------|----------|----------|----------|----------|-------|---------|---------|
| Putative R8_DRA 10300964 TO | 10300963 | 0        | 38       | 0        | 0        | 0        | 0        | 38    | 100.0   | 0.0     |
| Putative R8_DRA 11728828 TO | 11728827 | 0        | 0        | 37       | 0        | 0        | 0        | 37    | 100.0   | 0.0     |
| Putative R8_DRA 10190509 TO | 10190508 | 33       | 0        | 0        | 1        | 0        | 0        | 34    | 97.1    | 2.9     |
| Total                       |          | 33       | 38       | 37       | 1        | 0        | 0        | 109   | 99.1    | 0.9     |

## R7-DRA and R8-DRA incoming R7-DRA

| name                        | skid     | R7-DRA-a | R7-DRA-b | R7-DRA-c | R8-DRA-a | R8-DRA-b | R8-DRA-c | total | %R7-DRA | %R8-DRA |
|-----------------------------|----------|----------|----------|----------|----------|----------|----------|-------|---------|---------|
| Putative R7_DRA 11728780 TO | 11728779 | 0        | 0        | 1        | 0        | 0        | 15       | 16    | 6.2     | 93.8    |
| Putative R7_DRA 10300950 TO | 10300949 | 0        | 0        | 0        | 0        | 16       | 0        | 16    | 0.0     | 100.0   |
| Putative R7_DRA 10191736 TO | 10191735 | 0        | 0        | 0        | 10       | 0        | 0        | 10    | 0.0     | 100.0   |
| Total                       |          | 0        | 0        | 1        | 10       | 16       | 15       | 42    | 2.4     | 97.6    |

## R7-DRA and R8-DRA incoming C2

| name                    | skid     | R7-DRA-a | R7-DRA-b | R7-DRA-c | R8-DRA-a | R8-DRA-b | R8-DRA-c | total | %R7-DRA | %R8-DRA |
|-------------------------|----------|----------|----------|----------|----------|----------|----------|-------|---------|---------|
| Putative C2 12044213 EK | 12044212 | 0        | 0        | 2        | 0        | 0        | 3        | 5     | 40.0    | 60.0    |
| Putative C2 11906498 GS | 11906497 | 0        | 2        | 0        | 0        | 1        | 0        | 3     | 66.7    | 33.3    |
| Total                   |          | 0        | 2        | 2        | 0        | 1        | 3        | 8     | 50.0    | 50.0    |

## R7-DRA and R8-DRA incoming Mi15

| name                      | skid     | R7-DRA-a | R7-DRA-b | R7-DRA-c | R8-DRA-a | R8-DRA-b | R8-DRA-c | total | %R7-DRA | %R8-DRA |
|---------------------------|----------|----------|----------|----------|----------|----------|----------|-------|---------|---------|
| Putative Mi15 10655927 TO | 10655926 | 0        | 2        | 0        | 0        | 2        | 0        | 4     | 50      | 50      |
| Total                     |          | 0        | 2        | 0        | 0        | 2        | 0        | 4     | 50      | 50      |

## R7-DRA and R8-DRA incoming Identified-<3

| name                         | skid     | R7-DRA-a | R7-DRA-b | R7-DRA-c | R8-DRA-a | R8-DRA-b | R8-DRA-c | total | %R7-DRA | %R8-DRA |
|------------------------------|----------|----------|----------|----------|----------|----------|----------|-------|---------|---------|
| Putative Dm-DRA1 11993077 EK | 11993076 | 1        | 0        | 0        | 0        | 0        | 0        | 1     | 100.0   | 0.0     |
| Putative Dm-DRA1 11993696 EK | 11993695 | 1        | 0        | 0        | 0        | 0        | 0        | 1     | 100.0   | 0.0     |
| Putative Dm9 14933803 EK     | 14933802 | 0        | 1        | 0        | 0        | 0        | 0        | 1     | 100.0   | 0.0     |
| Putative L3 12018070 EK      | 12018069 | 0        | 0        | 1        | 0        | 0        | 0        | 1     | 100.0   | 0.0     |
| Putative Dm-DRA1 16766813 EK | 16766812 | 0        | 0        | 1        | 0        | 0        | 0        | 1     | 100.0   | 0.0     |
| Putative Dm-DRA1 17155322 EK | 17155321 | 0        | 0        | 1        | 0        | 0        | 0        | 1     | 100.0   | 0.0     |
| Putative L1 11915726 EK      | 11915725 | 0        | 0        | 0        | 1        | 0        | 0        | 1     | 0.0     | 100.0   |
| Putative Mi15 11916191 EK    | 11916190 | 0        | 0        | 0        | 1        | 0        | 0        | 1     | 0.0     | 100.0   |
| Putative L3 10653986 EK      | 10653985 | 0        | 0        | 0        | 0        | 1        | 0        | 1     | 0.0     | 100.0   |
| Total                        |          | 2        | 1        | 3        | 2        | 1        | 0        | 9     | 66.7    | 33.3    |

## R7-DRA and R8-DRA incoming Unidentified-<3

| name            | skid     | R7-DRA-a | R7-DRA-b | R7-DRA-c | R8-DRA-a | R8-DRA-b | R8-DRA-c | total | %R7-DRA | %R8-DRA |
|-----------------|----------|----------|----------|----------|----------|----------|----------|-------|---------|---------|
| neuron 11915809 | 11915808 | 1        | 0        | 0        | 1        | 0        | 0        | 2     | 50.0    | 50.0    |
| neuron 11903225 | 11903224 | 0        | 1        | 0        | 0        | 0        | 0        | 1     | 100.0   | 0.0     |
| Total           |          | 1        | 1        | 0        | 1        | 0        | 0        | 3     | 66.7    | 33.3    |
