# Supplementary material for: Synaptic targets of photoreceptors specialized to detect color and skylight polarization in Drosophila
Source: eLife journal article supplement (doi:10.7554/elife.71858), 2021-12-16

**Ai***posterior DmDRA1*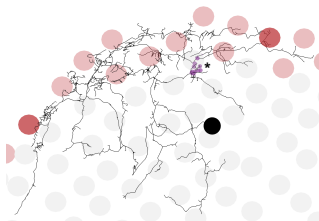**Aii***polar DmDRA1*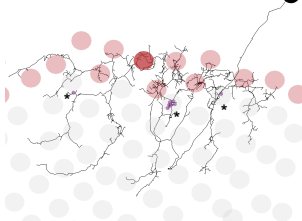**Aiii***anterior DmDRA1*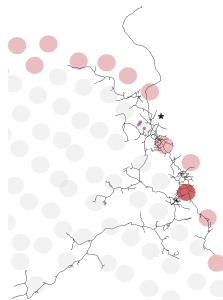**Aiv**

R7-DRA synapses  
R7 synapses

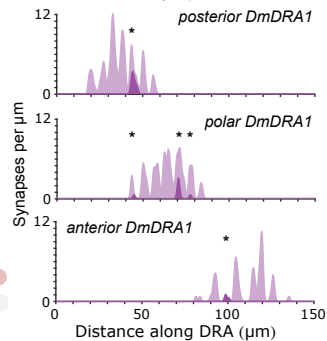**Bi***polar DmDRA2*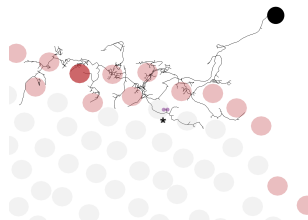**Bii***anterior DmDRA2*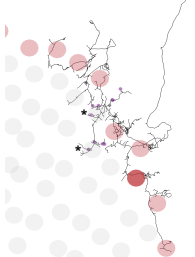**Biii**

R8-DRA synapses  
R7 synapses

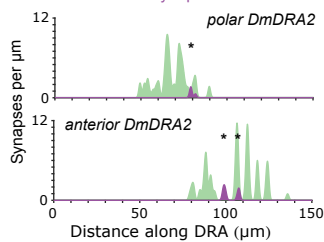

Supplement: supp [file elife-71858-supp-v2.zip]
