# Supplementary material for: Synaptic targets of photoreceptors specialized to detect color and skylight polarization in Drosophila
Source: eLife journal article supplement (doi:10.7554/elife.71858), 2021-12-16
Supplement: supp [file elife-71858-supp-v2.zip]

# Supplementary File 3: Tables of seed column synapses outside the medulla

## Contents

|                                      |   |
|--------------------------------------|---|
| R7 and R8 outgoing . . . . .         | 2 |
| R7 and R8 incoming . . . . .         | 3 |
| R7-DRA and R8-DRA outgoing . . . . . | 4 |
| R7-DRA and R8-DRA outgoing . . . . . | 5 |

## R7 and R8 outgoing

| Type             | No. | pR7 | yR7 | pR8 | yR8 | Sum |
|------------------|-----|-----|-----|-----|-----|-----|
| Dm9              | 6   | 13  | 9   | 6   | 6   | 34  |
| Dm8              | 15  | 0   | 0   | 0   | 0   | 0   |
| MeTu             | 7   | 0   | 0   | 0   | 0   | 0   |
| R7               | 5   | 0   | 0   | 16  | 25  | 41  |
| Tm5c             | 6   | 0   | 5   | 2   | 9   | 16  |
| Tm20             | 4   | 0   | 1   | 0   | 1   | 2   |
| Mi15             | 4   | 5   | 5   | 15  | 35  | 60  |
| Mi4              | 4   | 0   | 0   | 0   | 4   | 4   |
| ML1              | 4   | 0   | 0   | 0   | 0   | 0   |
| Dm2              | 4   | 0   | 0   | 0   | 0   | 0   |
| Dm11             | 2   | 16  | 23  | 1   | 4   | 44  |
| L3               | 4   | 15  | 17  | 7   | 10  | 49  |
| Mi1              | 4   | 0   | 0   | 1   | 1   | 2   |
| R8               | 4   | 22  | 24  | 0   | 0   | 46  |
| Tm5a             | 2   | 0   | 0   | 0   | 0   | 0   |
| Tm5b             | 2   | 0   | 0   | 0   | 0   | 0   |
| Tm               | 9   | 0   | 0   | 0   | 0   | 0   |
| Tm5b-like        | 3   | 0   | 0   | 0   | 0   | 0   |
| Mi9              | 4   | 0   | 0   | 0   | 0   | 0   |
| L1               | 4   | 2   | 1   | 10  | 7   | 20  |
| aMe12            | 2   | 0   | 0   | 0   | 0   | 0   |
| Dm               | 5   | 0   | 0   | 0   | 0   | 0   |
| ML-VPN1          | 3   | 0   | 0   | 0   | 0   | 0   |
| C2               | 2   | 1   | 0   | 4   | 0   | 5   |
| Mt-VPN           | 4   | 0   | 1   | 0   | 7   | 8   |
| Mti              | 3   | 0   | 0   | 0   | 0   | 0   |
| Tm5a-like        | 1   | 0   | 0   | 0   | 0   | 0   |
| TmY10            | 1   | 0   | 0   | 0   | 0   | 0   |
| Mi10             | 1   | 0   | 0   | 0   | 0   | 0   |
| Mi               | 1   | 0   | 0   | 0   | 0   | 0   |
| C3               | 1   | 0   | 0   | 0   | 0   | 0   |
| Identified <3    | 26  | 0   | 0   | 2   | 0   | 2   |
| Unidentified >=3 | 2   | 0   | 0   | 0   | 2   | 2   |
| Unidentified <3  | 62  | 1   | 0   | 0   | 3   | 4   |
| Total            | 211 | 75  | 86  | 64  | 114 | 339 |

## R7 and R8 incoming

| Type             | No. | pR7 | yR7 | pR8 | yR8 | Sum |
|------------------|-----|-----|-----|-----|-----|-----|
| Dm9              | 6   | 8   | 4   | 5   | 1   | 18  |
| R8               | 4   | 16  | 25  | 0   | 0   | 41  |
| R7               | 4   | 0   | 0   | 22  | 24  | 46  |
| Mt-VPN           | 1   | 0   | 2   | 0   | 3   | 5   |
| C2               | 1   | 0   | 0   | 0   | 0   | 0   |
| L3               | 1   | 0   | 0   | 0   | 0   | 0   |
| Identified <3    | 11  | 1   | 0   | 2   | 5   | 8   |
| Unidentified >=3 | 0   | 0   | 0   | 0   | 0   | 0   |
| Unidentified <3  | 4   | 0   | 2   | 0   | 0   | 2   |
| Total            | 32  | 25  | 33  | 29  | 33  | 120 |

## R7-DRA and R8-DRA outgoing

| Type             | No. | R7-DRA | R8-DRA | Sum |
|------------------|-----|--------|--------|-----|
| Dm-DRA1          | 20  | 0      | 0      | 0   |
| Dm9              | 6   | 1      | 1      | 2   |
| MeTu-DRA         | 30  | 0      | 0      | 0   |
| R7-DRA           | 3   | 0      | 16     | 16  |
| Dm-DRA2          | 9   | 0      | 6      | 6   |
| Dm2              | 4   | 0      | 0      | 0   |
| R8-DRA           | 3   | 19     | 0      | 19  |
| Mi15             | 4   | 12     | 8      | 20  |
| Mti-DRA-1        | 6   | 0      | 0      | 0   |
| MeMe-DRA         | 2   | 0      | 0      | 0   |
| L3               | 3   | 10     | 8      | 18  |
| VPN-DRA          | 6   | 0      | 0      | 0   |
| L1               | 3   | 4      | 3      | 7   |
| Tm20             | 3   | 0      | 0      | 0   |
| Mti-DRA-2        | 4   | 0      | 0      | 0   |
| Mi1              | 3   | 0      | 0      | 0   |
| MeTu             | 2   | 0      | 0      | 0   |
| Tm5-like         | 1   | 0      | 0      | 0   |
| Mi9              | 2   | 0      | 0      | 0   |
| Dm11             | 1   | 0      | 0      | 0   |
| aMe12            | 1   | 0      | 0      | 0   |
| TmY              | 1   | 0      | 0      | 0   |
| ML-VPN2          | 1   | 0      | 0      | 0   |
| C2               | 1   | 2      | 1      | 3   |
| Identified <3    | 33  | 3      | 2      | 5   |
| Unidentified >=3 | 2   | 0      | 0      | 0   |
| Unidentified <3  | 57  | 0      | 0      | 0   |
| Total            | 211 | 51     | 45     | 96  |

R7-DRA and R8-DRA outgoing

| Type             | No. | R7-DRA | R8-DRA | Sum |
|------------------|-----|--------|--------|-----|
| Dm9              | 4   | 0      | 0      | 0   |
| R8-DRA           | 3   | 16     | 0      | 16  |
| R7-DRA           | 3   | 0      | 19     | 19  |
| C2               | 2   | 3      | 3      | 6   |
| Mi15             | 1   | 2      | 2      | 4   |
| Identified <3    | 9   | 0      | 0      | 0   |
| Unidentified >=3 | 0   | 0      | 0      | 0   |
| Unidentified <3  | 2   | 1      | 1      | 2   |
| Total            | 24  | 22     | 25     | 47  |
