# Supplementary figures and images for: Synaptic targets of photoreceptors specialized to detect color and skylight polarization in Drosophila
Source: eLife journal article supplement (doi:10.7554/elife.71858), 2021-12-16

**A** 6x Mti-DRA-1 cells

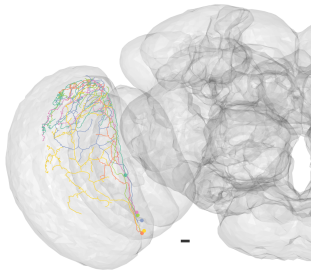

**B** 4x Mti-DRA-2 cells

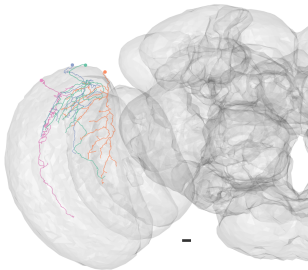

**C**

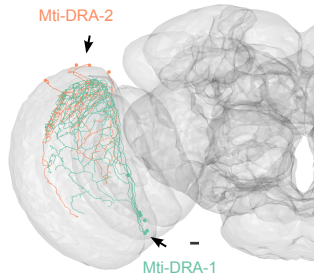

Supplement: supp [file elife-71858-supp-v2.zip]

**Ai***posterior DmDRA1*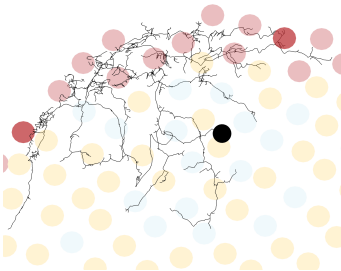**Aii***polar DmDRA1*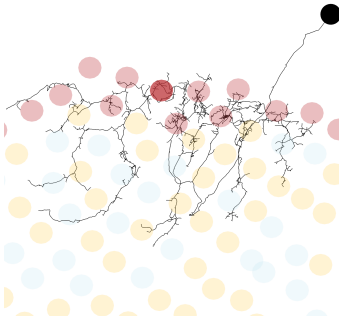**Aiii***anterior DmDRA1*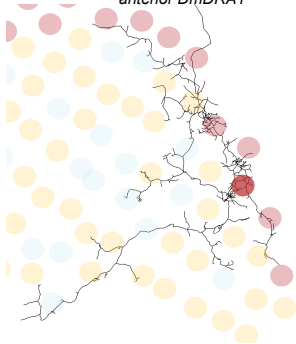

Supplement: supp [file elife-71858-supp-v2.zip]

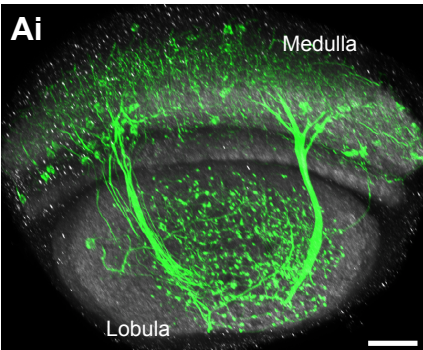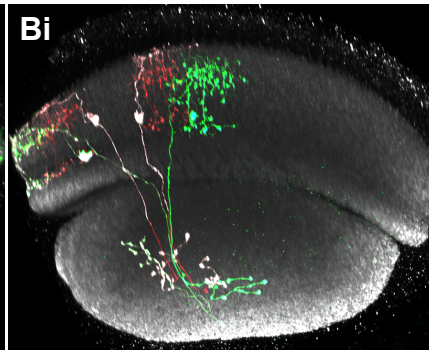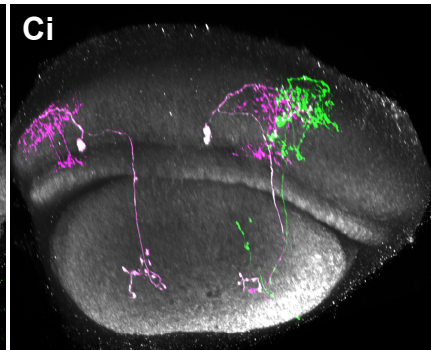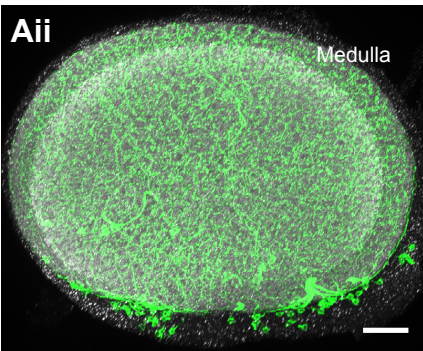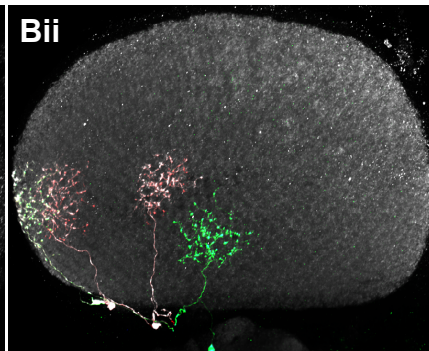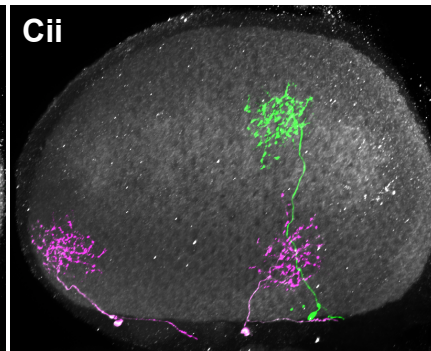

Supplement: supp [file elife-71858-supp-v2.zip]

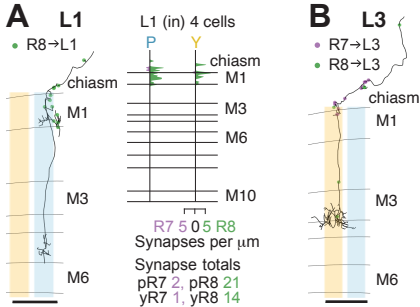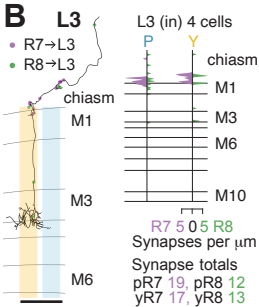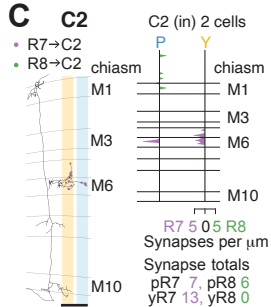

Supplement: supp [file elife-71858-supp-v2.zip]

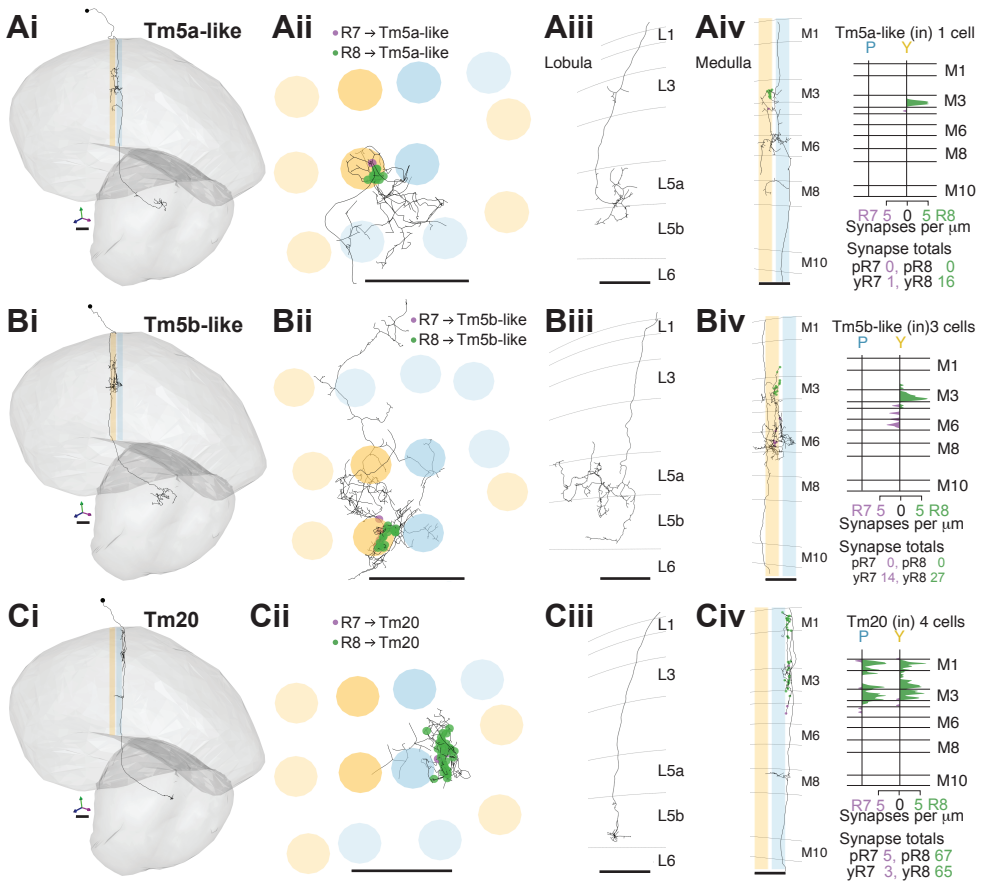

Supplement: supp [file elife-71858-supp-v2.zip]

**Ai**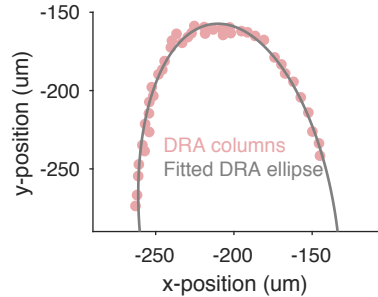**Aii**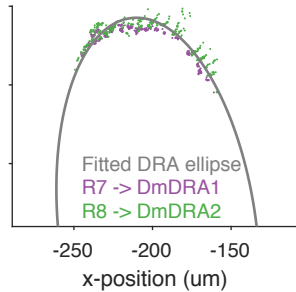**Aiii**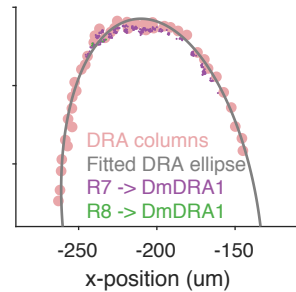**Aiv**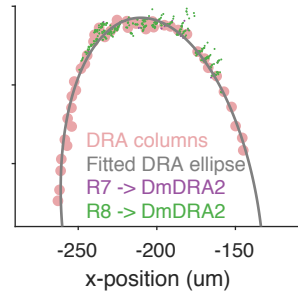

Supplement: supp [file elife-71858-supp-v2.zip]

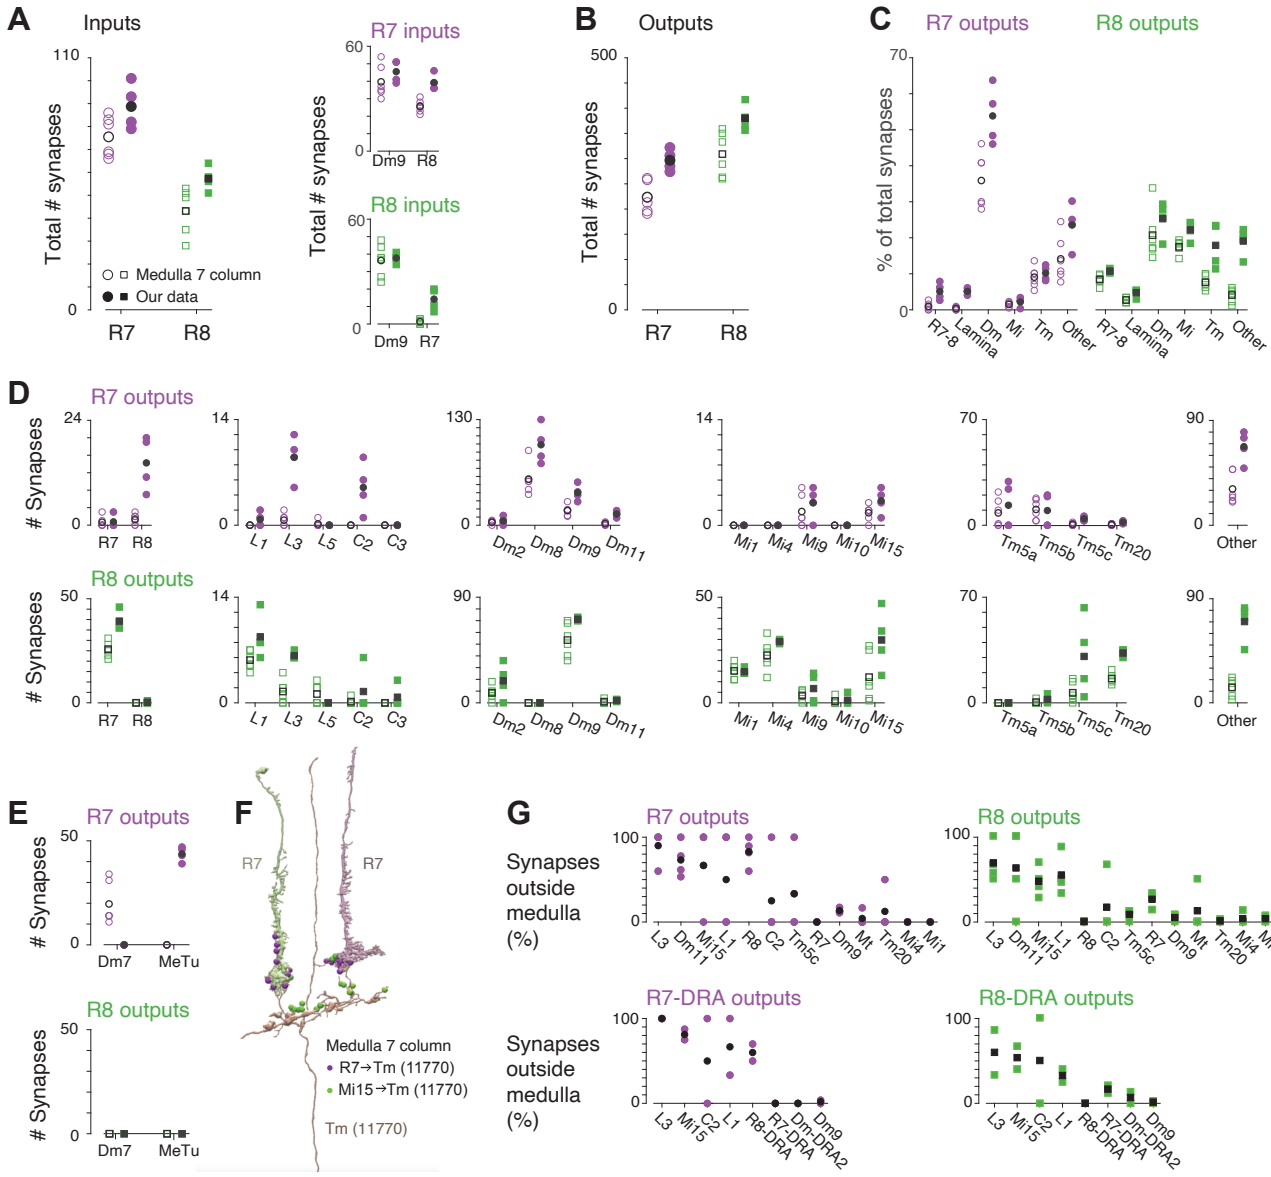

Supplement: supp [file elife-71858-supp-v2.zip]

**Ai MeTu-DRA**

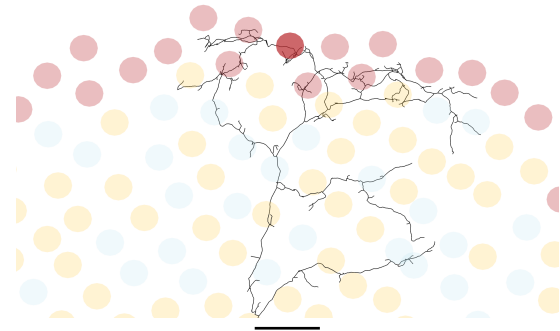

**Bi VPN-DRA**  
15969128

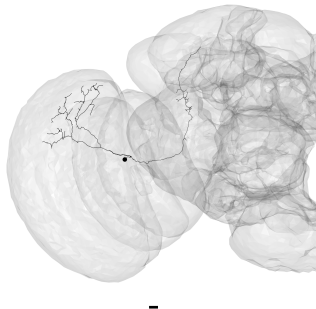

**Bii**

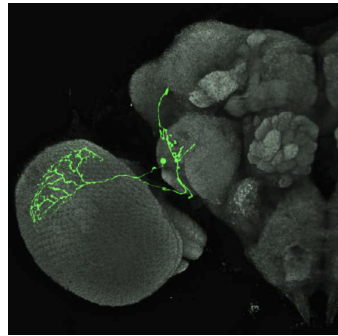

Supplement: supp [file elife-71858-supp-v2.zip]

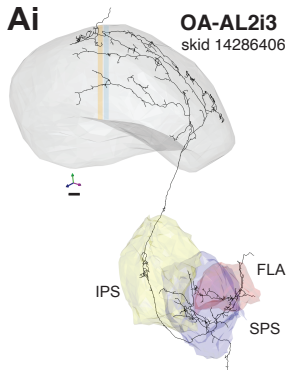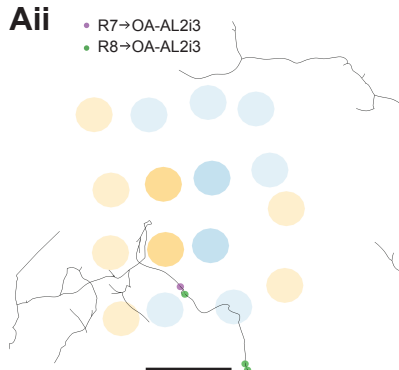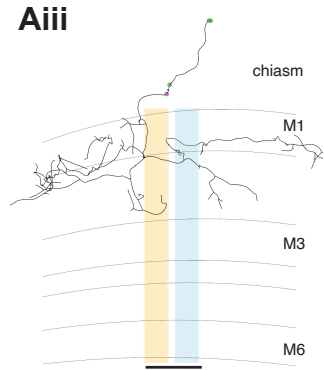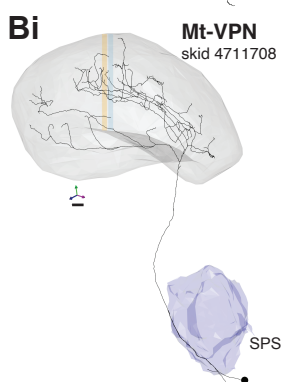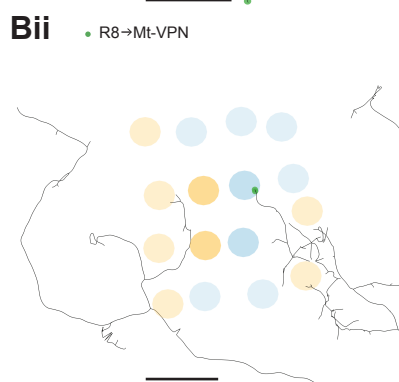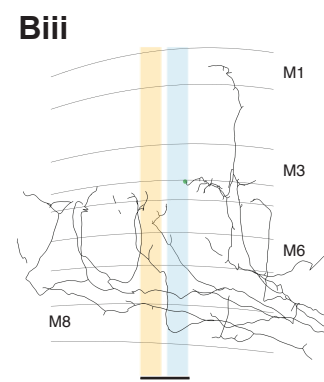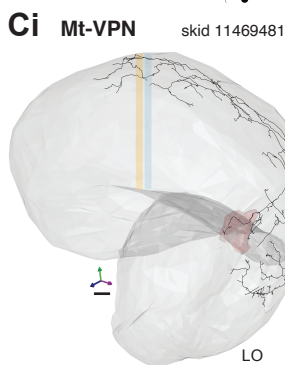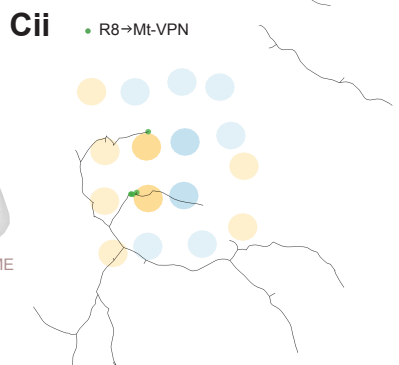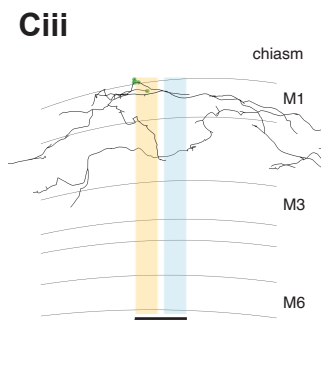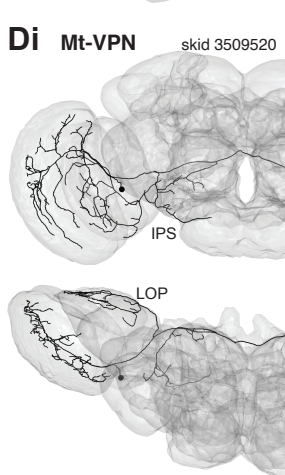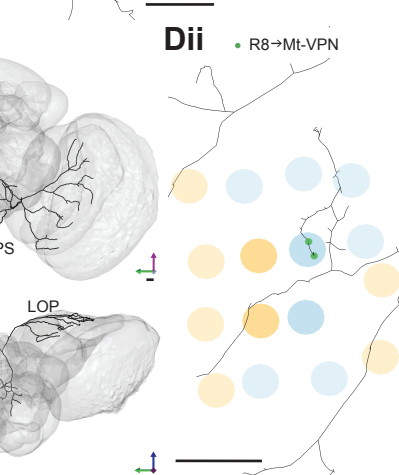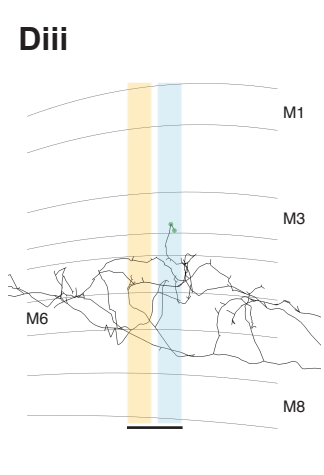

Supplement: supp [file elife-71858-supp-v2.zip]

**Ai**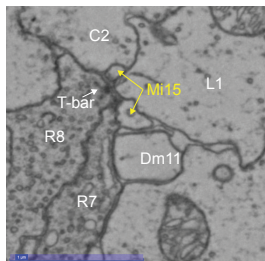**Aii**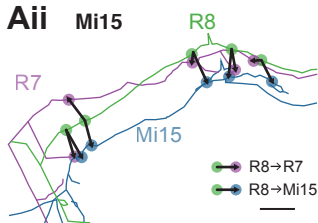**B**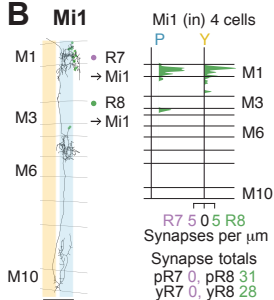**C**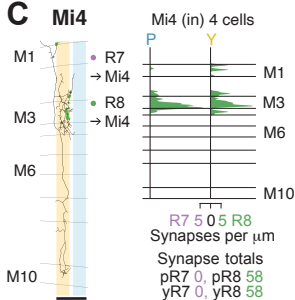**D**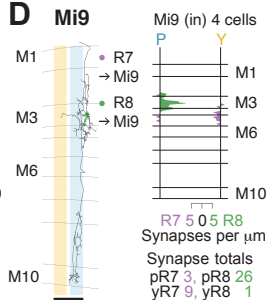

Supplement: supp [file elife-71858-supp-v2.zip]

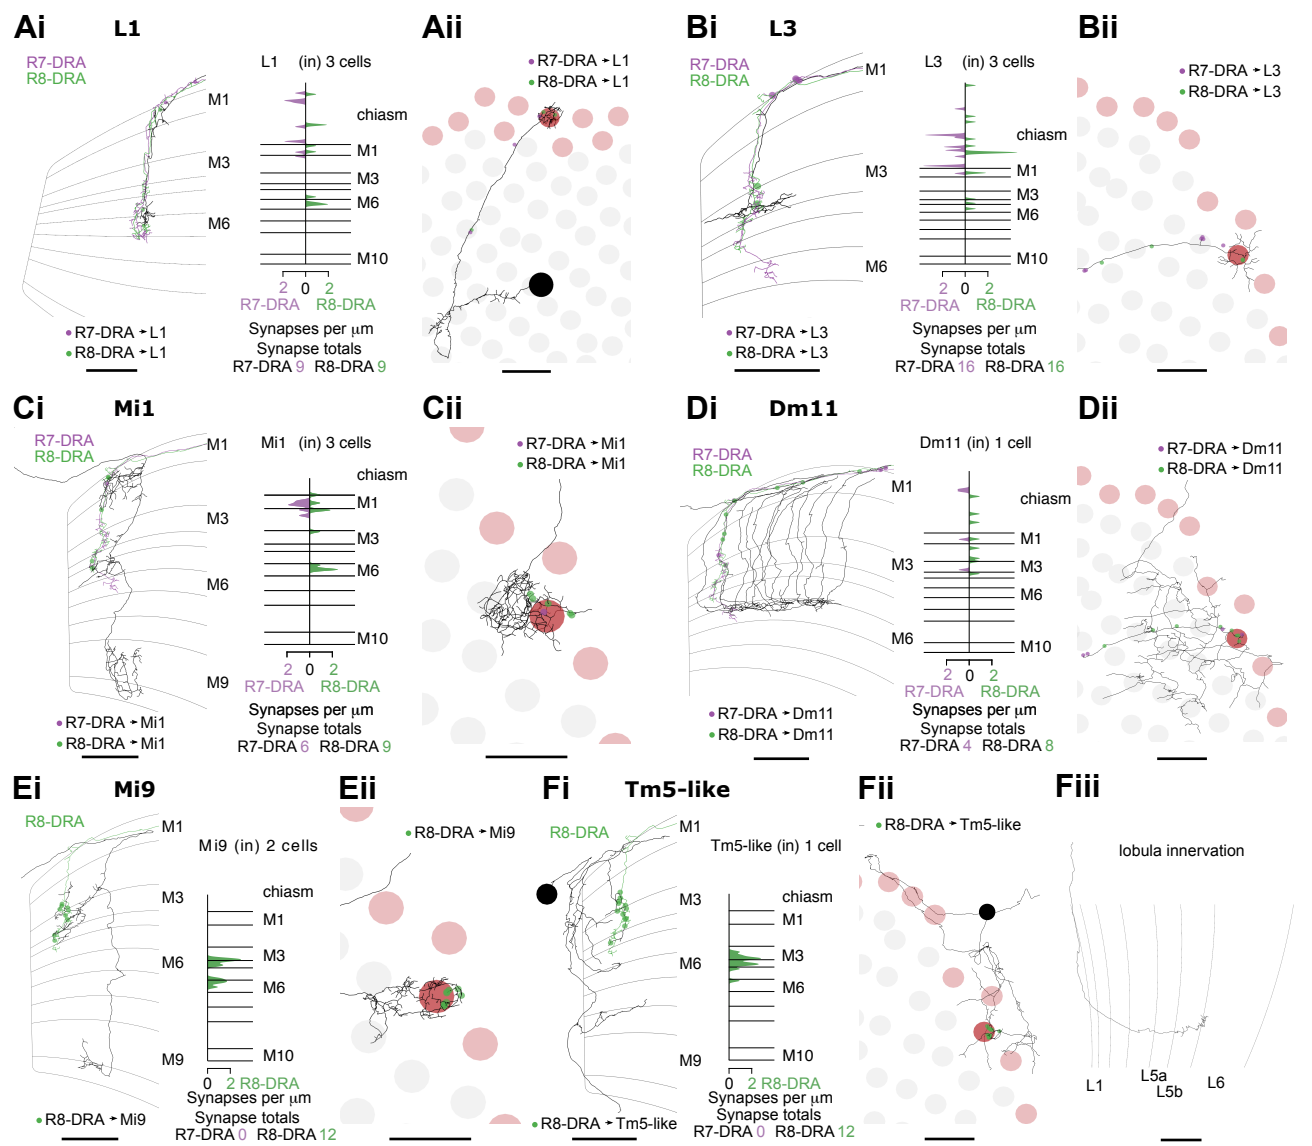

Supplement: supp [file elife-71858-supp-v2.zip]

**A**

R7 output

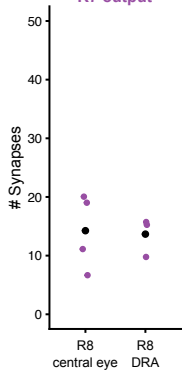**B**

R8 output

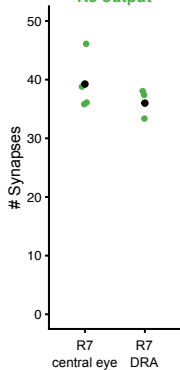**C**

R7 output

R8 output

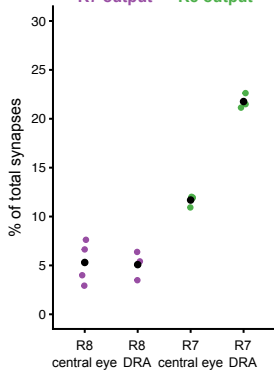

Supplement: supp [file elife-71858-supp-v2.zip]

**A** Synapses in M6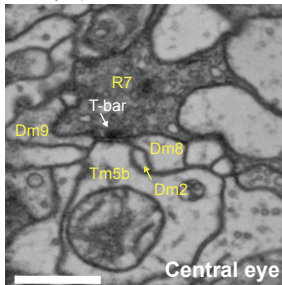**B** Synapses outside the medulla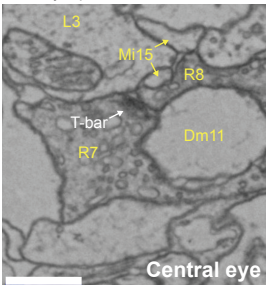**C** Synapses with glia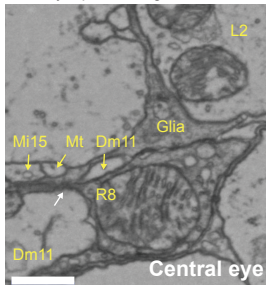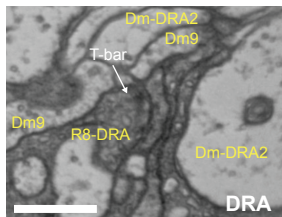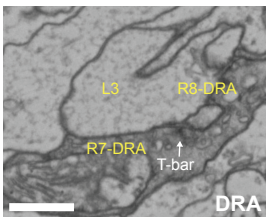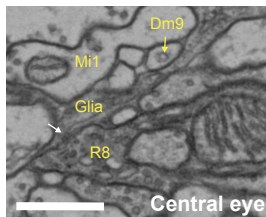

Supplement: supp [file elife-71858-supp-v2.zip]

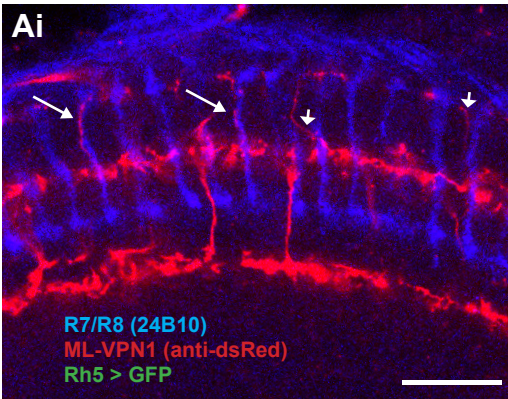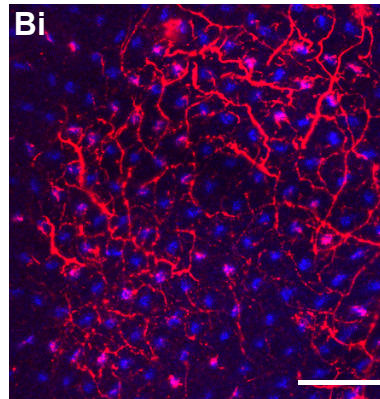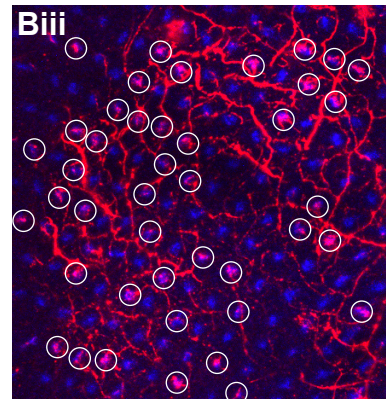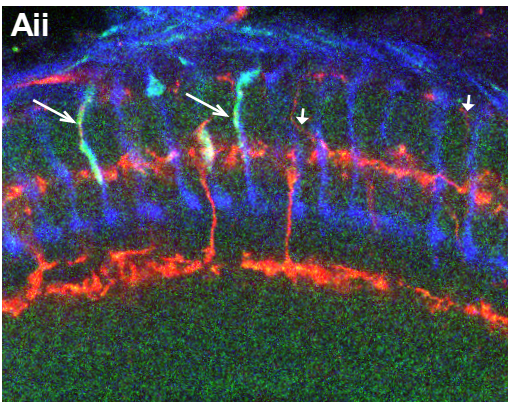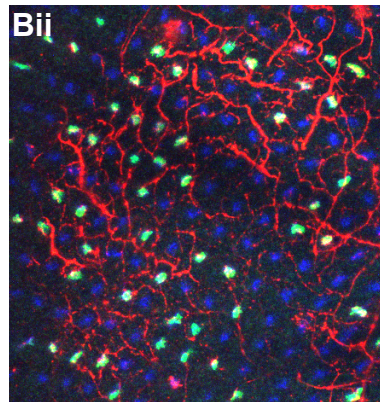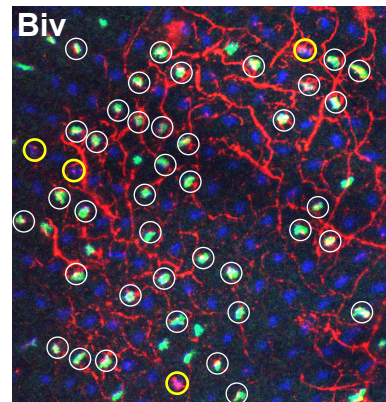

Supplement: supp [file elife-71858-supp-v2.zip]
